# Supplementary material for: Carbohydrate–lectin recognition of well-defined heterogeneous dendronized glycopolymers: systematic studies on the heterogeneity in glycopolymer–lectin binding
Source: Royal Society of Chemistry journal article supplement (doi:10.1039/d1py01001h), 2021-01-01
Supplement: d1py01001h1.pdf [file d1py01001h1.pdf]

# Supporting Information

## Carbohydrate-lectin recognition of well-defined heterogeneous dendronized glycopolymers: systematic studies on heterogeneity in glycopolymer-lectin binding

Xingyou Wang,<sup>a</sup> Mengtong Wang,<sup>a</sup> Caiyun Wang,<sup>a</sup> Wei Deng,<sup>a</sup> Meina Liu,<sup>\*a,b,c</sup>

<sup>a</sup>*School of Chemical and Environmental Engineering, Shanghai Institute of Technology, 100 Haiquan Road, Shanghai 201418, People's Republic of China. Email: meina.liu@sit.edu.cn*

<sup>b</sup>*Key laboratory of Synthetic and Self-Assembly Chemistry for Organic Function Molecules, Shanghai Institute of Organic Chemistry, Chinese Academy of Sciences, 345 Lingling Road, Shanghai 200032, People's Republic of China.*

<sup>c</sup>*State Key laboratory of Molecular Engineering of Polymers, Fudan University, 220 Handan Road, Shanghai 200433, People's Republic of China*

### Table of Contents:

|                                                                                                  |     |
|--------------------------------------------------------------------------------------------------|-----|
| 1. Experimental Section .....                                                                    | S2  |
| 1.1 Synthesis of azide-sugars .....                                                              | S2  |
| 1.2 Experimental details for synthesis and characterization of compounds and glycopolymers ..... | S2  |
| 1.3 References .....                                                                             | S12 |
| 2. Copies of NMR spectra of compounds and glycopolymers .....                                    | S13 |
| 3. FT-IR spectra of glycopolymers .....                                                          | S46 |
| 4. Dynamic light scattering .....                                                                | S46 |
| 5. ITC thermograms .....                                                                         | S47 |
| 6. Characterization of OAc-protected glycopolymers .....                                         | S51 |

## 1. Experimental Section

### 1.1 Synthesis of azide-sugars

#### 2,3,4,6-Tetra-*O*-acetyl- $\beta$ -D-glucopyranosyl azide ( $\beta$ Glu-OAc-N<sub>3</sub>)<sup>1</sup>

A white solid ( $\beta$ Glu-OAc-N<sub>3</sub>) was obtained by using procedures known in the literature.<sup>1</sup> <sup>1</sup>H NMR (500 MHz, CDCl<sub>3</sub>):  $\delta$  = 5.20 (t, *J* = 9.5 Hz, 1H), 5.09 (t, *J* = 10.0 Hz, 1H), 4.94 (dd, *J* = 9.5, 9.0 Hz, 1H), 4.64 (d, *J* = 9.0 Hz, 1H), 4.26 (dd, *J* = 12.5, 5.0 Hz, 1H), 4.15 (dd, *J* = 12.5, 2.0 Hz, 1H), 3.78 (ddd, *J* = 10.0, 5.0, 2.5 Hz, 1H), 2.09 (s, 3H), 2.06 (s, 3H), 2.01 (s, 3H), 1.99 (s, 3H).

#### 2,3,4,6-Tetra-*O*-acetyl- $\beta$ -D-galactopyranosyl azide ( $\beta$ Gal-OAc-N<sub>3</sub>)<sup>2</sup>

A white solid ( $\beta$ Gal-OAc-N<sub>3</sub>) was obtained by using procedures known in the literature.<sup>2</sup> <sup>1</sup>H NMR (500 MHz, CDCl<sub>3</sub>):  $\delta$  = 5.39 (d, *J* = 2.5 Hz, 1H), 5.13 (t, *J* = 10.0 Hz, 1H), 5.01 (dd, *J* = 10.5, 3.5 Hz, 1H), 4.58 (d, *J* = 8.5 Hz, 1H), 4.14 (t, *J* = 6.5 Hz, 2H), 4.00 (t, *J* = 6.0 Hz, 1H), 2.05 (dd, *J* = 54.5, 38.5 Hz, 12H).

#### 2,3,4,6-Tetra-*O*-acetyl- $\alpha$ -D-mannopyranosyl azide ( $\alpha$ Man-OAc-N<sub>3</sub>)<sup>2</sup>

A colorless oil ( $\alpha$ Man-OAc-N<sub>3</sub>) was obtained by using procedures known in the literature.<sup>3</sup> <sup>1</sup>H NMR (500 MHz, CDCl<sub>3</sub>):  $\delta$  = 5.39 (d, *J* = 1.5 Hz, 1H), 5.31 – 5.23 (m, 2H), 5.15 (d, *J* = 1.0 Hz, 1H), 4.30 (dd, *J* = 12.5, 5.5 Hz, 1H), 4.18 – 4.13 (m, 2H), 2.17 (s, 3H), 2.11 (s, 3H), 2.05 (s, 3H), 1.99 (s, 3H).

### 1.2 Experimental details for synthesis and characterization of compounds and glycopolymers

#### Synthesis of *N*-(*tert*-Butyloxycarbonyl)tris(hydroxymethyl)aminomethane <sup>3</sup>

A solution of di-*tert*-butyl dicarbonate (Boc<sub>2</sub>O, 23.42 g, 107.31 mmol) in *t*-BuOH (100 mL) was added under RT to a suspension of tris(hydroxymethyl)aminomethane (10.00 g, 82.55 mmol) in a mixture of MeOH (75 mL) and *t*-BuOH (75 mL). The mixture was stirred at RT for 18 h, then the solution concentrated under reduced pressure. The residue was purified by precipitation with cold ethyl acetate, and vacuum filtered to afford the pure compound as a white solid (16.44 g, 90%). <sup>1</sup>H NMR (500 MHz, DMSO-d<sub>6</sub>):  $\delta$  = 5.71 (s, 1H), 4.55 (s, 3H, OH), 3.46 (s, 6H), 1.31 (s, 9H).

#### Synthesis of *N*-(*tert*-Butyloxycarbonyl)tris[(propargyloxy)methyl]aminomethane (**1**) <sup>3</sup>

*N*-(*tert*-Butyloxycarbonyl)tris(hydroxymethyl)aminomethane (10.00 g, 45.20 mmol) was dissolved in anhydrous DMF (50 mL) and stirred at 0 °C for 10 min. 3-Bromopropyne (10.97 mL, 140.11 mmol) was added dropwise. Then powdered potassium hydroxide (7.86 g, 140.11 mmol) was added, and keeping stirring for 1 h at 0 °C. The reaction was allowed to warm to RT and stirred for 18 h. At the end of the reaction, the reaction mixture was diluted with 100 mL of ethyl acetate and was washed with water (3 × 50 mL). The organic layer was collected, dried over anhydrous Na<sub>2</sub>SO<sub>4</sub>, filtered, and concentrated. The residue was purified by silica gel column chromatography (petroleum ether/ethyl acetate 9 : 1) to give the product as a yellow oil **1**

(petroleum ether/ethyl acetate 6 : 1,  $R_f = 0.55$ ) (9.85 g, 65% yield).  $^1\text{H NMR}$  (500 MHz,  $\text{CDCl}_3$ ):  $\delta = 4.89$  (s, 1H), 4.11 (d,  $J = 2.0$  Hz, 6H), 3.74 (s, 6H), 2.41 (t,  $J = 2.0$  Hz, 3H), 1.39 (s, 9H).

### Synthesis of Boc- $\beta$ Gal- $\beta$ Gal- $\beta$ Gal-OAc (**11**, BBB)

Compound **1** (0.48 g, 1.43 mmol), 2,3,4,6-tetra-O-acetyl- $\beta$ -D-galactopyranosyl azide (1.60 g, 4.29 mmol) were dissolved in a 8 mL mixture of t-BuOH/H<sub>2</sub>O (1 : 1 v/v). Then copper(II) sulfate pentahydrate (0.18 g, 0.72 mmol) and sodium ascorbate (0.28 g, 1.43 mmol) were added successively. After stirring for 3 hours at room temperature TLC (petroleum ether/ethyl acetate 1 : 4, compound **11**,  $R_f = 0.41$ ) showed the reaction was completed. The reaction solution was mixed with 50 mL dichloromethane (DCM) and washed with water ( $3 \times 25$  mL). The separated organic layer was dried over anhydrous  $\text{Na}_2\text{SO}_4$ , filtered, and concentrated to give the residue which was purified by flash column chromatography (petroleum ether/ethyl acetate 1:3) to afford the desired product Boc- $\beta$ Gal- $\beta$ Gal- $\beta$ Gal-OAc (**11**, BBB) (1.77 g, 90%) as a colorless oil.  $^1\text{H NMR}$  (500 MHz,  $\text{CDCl}_3$ ):  $\delta = 7.86$  (s, 3H), 5.92 (d,  $J = 9.0$  Hz, 3H), 5.60 (t,  $J = 9.5$  Hz, 6H), 5.54 (d,  $J = 3.0$  Hz, 3H), 5.29 (s, 6H), 5.00 (s, 1H), 4.63 (d,  $J = 5.0$  Hz, 6H), 4.28 (t,  $J = 6.5$  Hz, 3H), 4.17 (d,  $J = 6.0$  Hz, 7H), 3.74 (dd,  $J = 27.3, 9.0$  Hz, 6H), 2.21 (s, 10H), 2.03 (s, 21H), 2.00 (s, 9H), 1.80 (s, 10H), 1.40 (s, 10H).  $^{13}\text{C NMR}$  (125 MHz,  $\text{CDCl}_3$ ):  $\delta = 170.53, 170.15, 169.10, 145.62, 121.83, 86.19, 74.01, 71.03, 69.67, 68.09, 67.04, 64.88, 61.25, 53.63, 28.56, 21.03, 20.34, 0.16$ . HRMS (ESI):  $m/z$  calc. for  $\text{C}_{60}\text{H}_{82}\text{N}_{10}\text{O}_{32}\text{Na}$   $[\text{M}+\text{Na}]^+$ : 1477.49888; found: 1477.49886.

### Synthesis of Boc- $\beta$ Glu- $\beta$ Glu- $\beta$ Glu-OAc (**12**, CCC)

Compound **1** (0.48 g, 1.43 mmol), 2,3,4,6-tetra-O-acetyl- $\beta$ -D-glucopyranosyl azide (1.60 g, 4.29 mmol) were dissolved in a 8 mL mixture of t-BuOH/H<sub>2</sub>O (1 : 1 v/v). Then copper(II) sulfate pentahydrate (0.18 g, 0.72 mmol) and sodium ascorbate (0.28 g, 1.43 mmol) were added successively. After stirring for 3 hours at room temperature TLC (petroleum ether/ethyl acetate 1 : 4, compound **12**,  $R_f = 0.39$ ) showed the reaction was completed. The reaction solution was mixed with 50 mL dichloromethane (DCM) and washed with water ( $3 \times 25$  mL). The separated organic layer was dried over anhydrous  $\text{Na}_2\text{SO}_4$ , filtered, and concentrated to give the residue, which was purified by flash column chromatography (petroleum ether/ethyl acetate 1:3) to afford the desired product Boc- $\beta$ Glu- $\beta$ Glu- $\beta$ Glu-OAc (**12**, CCC) (1.75 g, 89%) as a colorless oil.  $^1\text{H NMR}$  (500 MHz,  $\text{CDCl}_3$ ):  $\delta = 7.96$  (s, 3H), 5.97 (d,  $J = 9.0$  Hz, 4H), 5.52 (t,  $J = 9.0$  Hz, 5H), 5.42 (t,  $J = 9.5$  Hz, 3H), 5.31 (t,  $J = 9.5$  Hz, 5H), 4.95 (s, 1H), 4.62 (s, 8H), 4.31 – 4.25 (m, 4H), 4.11 (dd,  $J = 15.5, 8.0$  Hz, 12H), 3.75 – 3.68 (m, 11H), 2.05 (d,  $J = 2.0$  Hz, 41H), 2.01 (s, 18H), 1.79 (s, 11H), 1.37 (s, 14H).  $^{13}\text{C NMR}$  (125 MHz,  $\text{CDCl}_3$ ):  $\delta = 171.17, 170.56, 170.01, 169.48, 168.86, 154.84, 85.68, 79.22, 75.01, 72.82, 70.29, 69.62, 67.79, 64.79, 61.65, 60.40, 58.42, 28.37, 21.05, 20.89 – 20.38, 20.11$ . HRMS (ESI):  $m/z$  calc. for  $\text{C}_{60}\text{H}_{82}\text{N}_{10}\text{O}_{32}\text{Na}$   $[\text{M}+\text{Na}]^+$ : 1477.49888; found: 1477.49885.

### Deprotection of the Boc-Protected compound Boc- $\alpha$ Man- $\alpha$ Man- $\alpha$ Man-OAc (**2**, AAA)

Compound **2** (0.40 g, 0.27 mmol) was dissolved in 1 mL DCM and trifluoroacetic acid (0.55 mL) dissolved in 0.55 mL DCM was added dropwise at 0 °C. After stirring at 0 °C for 1 hour, the reaction mixture was stirred at room temperature for 3 hours. After the reaction was completed, the mixture was concentrated to dryness. The residue was re-dissolved in  $\text{CH}_2\text{Cl}_2$  (20 mL) and washed successively with  $\text{H}_2\text{O}$  (2 x 20 mL), followed by saturated aq.  $\text{NaHCO}_3$  solution (20 mL).

The organic layer was collected and dried over anhydrous Na<sub>2</sub>SO<sub>4</sub>, the solvent was evaporated to give a product **NH<sub>2</sub>- $\alpha$ Man- $\alpha$ Man- $\alpha$ Man-OAc 13** (0.35 g, 94%) which was used directly without further purification. <sup>1</sup>H NMR (500 MHz, CDCl<sub>3</sub>):  $\delta$  = 7.80 (s, 3H), 6.06 (d, *J* = 2.5 Hz, 3H), 5.95 – 5.89 (m, 6H), 5.38 (t, *J* = 9.0 Hz, 3H), 4.63 (d, *J* = 3.0 Hz, 6H), 4.36 (dd, *J* = 12.5, 5.0 Hz, 3H), 4.06 (dd, *J* = 12.5, 2.5 Hz, 3H), 3.93 – 3.89 (m, 3H), 3.47 (s, 6H), 2.18 (s, 9H), 2.08 (s, 9H), 2.06 (s, 9H), 2.03 (s, 9H), 1.83 (s, 2H). <sup>13</sup>C NMR (125 MHz, CDCl<sub>3</sub>):  $\delta$  = 170.59, 169.75, 169.51, 145.61, 123.25, 83.71, 72.12, 68.93, 68.30, 66.06, 64.60, 61.68, 56.26, 20.76, 20.63. HRMS (ESI): *m/z* calc. for C<sub>55</sub>H<sub>74</sub>N<sub>10</sub>O<sub>30</sub>Na [M+Na]<sup>+</sup>: 1377.44645; found: 1377.44642.

### Deprotection of the Boc-Protected compound Boc- $\alpha$ Man- $\alpha$ Man-yne-OAc (3, AAX)

Compound **3** (0.43 g, 0.39 mmol) was dissolved in 1 mL DCM and trifluoroacetic acid (0.79 mL) dissolved in 0.79 mL DCM was added dropwise at 0 °C. After stirring at 0 °C for 1 hour, the reaction mixture was stirred at room temperature for 3 hours. After the reaction was completed, the mixture was concentrated to dryness. The residue was re-dissolved in CH<sub>2</sub>Cl<sub>2</sub> (20 mL) and washed successively with H<sub>2</sub>O (2 x 20 mL), followed by saturated aq. NaHCO<sub>3</sub> solution (20 mL). The organic layer was collected and dried over anhydrous Na<sub>2</sub>SO<sub>4</sub>, the solvent was evaporated to give a product **NH<sub>2</sub>- $\alpha$ Man- $\alpha$ Man-yne-OAc 19** (0.38 g, 98%) which was used directly without further purification. <sup>1</sup>H NMR (500 MHz, CDCl<sub>3</sub>):  $\delta$  = 7.78 (d, *J* = 2.0 Hz, 2H), 6.03 (s, 2H), 5.95 – 5.88 (m, 4H), 5.37 (t, *J* = 9.0 Hz, 2H), 4.66 (d, *J* = 1.5 Hz, 4H), 4.35 (dd, *J* = 12.5, 5.0 Hz, 2H), 4.12 (d, *J* = 2.0 Hz, 2H), 4.05 (dd, *J* = 12.5, 2.5 Hz, 2H), 3.90 (s, 2H), 3.46 (d, *J* = 5.0 Hz, 6H), 2.45 (s, 1H), 2.17 (s, 6H), 2.08 – 2.03 (m, 18H), 1.97 (d, *J* = 3.5 Hz, 2H). <sup>13</sup>C NMR (125 MHz, CDCl<sub>3</sub>):  $\delta$  = 170.58, 169.76, 169.73, 169.47, 145.80, 123.10, 83.64, 79.78, 74.90, 72.28, 72.15, 71.69, 68.88, 68.34, 66.07, 64.73, 61.64, 58.67, 56.06, 20.75, 20.63. HRMS (ESI): *m/z* calc. for C<sub>41</sub>H<sub>55</sub>N<sub>7</sub>O<sub>21</sub>Na [M+Na]<sup>+</sup>: 1004.33432; found: 1004.33429.

### Deprotection of the Boc-Protected compound Boc- $\alpha$ Man-yne-yne-OAc (4, AXX)

Compound **4** (0.31 g, 0.43 mmol) was dissolved in 1 mL DCM and trifluoroacetic acid (0.87 mL) dissolved in 0.87 mL DCM was added dropwise at 0 °C. After stirring at 0 °C for 1 hour, the reaction mixture was stirred at room temperature for 3 hours. After the reaction was completed, the mixture was concentrated to dryness. The residue was re-dissolved in CH<sub>2</sub>Cl<sub>2</sub> (20 mL) and washed successively with H<sub>2</sub>O (2 x 20 mL), followed by saturated aq. NaHCO<sub>3</sub> solution (20 mL). The organic layer was collected and dried over anhydrous Na<sub>2</sub>SO<sub>4</sub>, the solvent was evaporated to give a product **NH<sub>2</sub>- $\alpha$ Man-yne-yne-OAc 20** (0.25 g, 96%) which was used directly without further purification. <sup>1</sup>H NMR (500 MHz, CDCl<sub>3</sub>):  $\delta$  = 7.78 (s, 1H), 6.00 (d, *J* = 2.0 Hz, 1H), 5.93 (d, *J* = 7.0 Hz, 2H), 5.37 (t, *J* = 9.0 Hz, 1H), 4.69 (s, 2H), 4.35 (dd, *J* = 12.5, 5.5 Hz, 1H), 4.14 (d, *J* = 2.0 Hz, 4H), 4.05 (dd, *J* = 12.5, 2.5 Hz, 1H), 3.93 – 3.89 (m, 1H), 3.47 (d, *J* = 6.0 Hz, 6H), 2.44 (t, *J* = 2.0 Hz, 2H), 2.29 (s, 2H), 2.18 (s, 3H), 2.08 (s, 3H), 2.06 (s, 3H), 2.04 (s, 3H). <sup>13</sup>C NMR (125 MHz, CDCl<sub>3</sub>):  $\delta$  = 170.62, 169.81, 169.74, 169.50, 145.91, 123.09, 83.61, 79.69, 74.88, 72.16, 71.99, 71.41, 68.88, 68.38, 66.08, 64.82, 61.63, 58.71, 56.13, 29.71, 20.74, 20.63. HRMS (ESI): *m/z* calc. for C<sub>27</sub>H<sub>36</sub>N<sub>4</sub>O<sub>12</sub>Na [M+Na]<sup>+</sup>: 631.22219; found: 631.22212.

### Deprotection of the Boc-Protected compound Boc- $\alpha$ Man- $\alpha$ Man- $\beta$ Gal-OAc (5, AAB)

Compound **5** (0.32 g, 0.22 mmol) was dissolved in 1 mL DCM and trifluoroacetic acid (0.44 mL) dissolved in 0.44 mL DCM was added dropwise at 0 °C. After stirring at 0 °C for 1 hour, the

reaction mixture was stirred at room temperature for 3 hours. After the reaction was completed, the mixture was concentrated to dryness. The residue was re-dissolved in CH<sub>2</sub>Cl<sub>2</sub> (20 mL) and washed successively with H<sub>2</sub>O (2 x 20 mL), followed by saturated aq. NaHCO<sub>3</sub> solution (20 mL). The organic layer was collected and dried over anhydrous Na<sub>2</sub>SO<sub>4</sub>, the solvent was evaporated to give a product **NH<sub>2</sub>- $\alpha$ Man- $\alpha$ Man- $\beta$ Gal-OAc 14** (0.28 g, 96%) which was used directly without further purification. <sup>1</sup>H NMR (500 MHz, CDCl<sub>3</sub>):  $\delta$  = 7.87 (s, 1H), 7.82 (d, *J* = 3.5 Hz, 2H), 6.11 – 6.08 (m, 2H), 5.96 – 5.91 (m, 4H), 5.89 (d, *J* = 9.5 Hz, 1H), 5.59 – 5.54 (m, 2H), 5.40 (t, *J* = 9.0 Hz, 2H), 5.29 (dd, *J* = 10.5, 3.5 Hz, 1H), 4.67 – 4.60 (m, 6H), 4.35 (dd, *J* = 12.5, 5.0 Hz, 2H), 4.28 (s, 1H), 4.15 (dd, *J* = 8.5, 6.5 Hz, 2H), 4.07 (d, *J* = 12.0 Hz, 2H), 3.93 (s, 2H), 3.45 (s, 4H), 3.38 (s, 2H), 2.20 (d, *J* = 12.0 Hz, 9H), 2.09 – 2.00 (m, 27H), 1.81 (s, 2H). <sup>13</sup>C NMR (125 MHz, CDCl<sub>3</sub>):  $\delta$  = 170.71, 170.54, 170.26, 169.93, 169.85, 169.64, 169.41, 145.82, 145.43, 123.37, 121.76, 83.86, 74.08, 72.22, 71.87, 70.95, 69.06, 68.52, 67.14, 66.12, 64.82, 64.44, 61.81, 61.35, 56.19, 20.92, 20.85, 20.74, 20.66, 20.33. HRMS (ESI): *m/z* calc. for C<sub>55</sub>H<sub>74</sub>N<sub>10</sub>O<sub>30</sub>Na [M+Na]<sup>+</sup>: 1377.44645; found: 1377.44636.

#### **Deprotection of the Boc-Protected compound Boc- $\alpha$ Man- $\alpha$ Man- $\beta$ Glu-OAc (6, AAC)**

Compound **6** (0.39 g, 0.27 mmol) was dissolved in 1 mL DCM and trifluoroacetic acid (0.54 mL) dissolved in 0.54 mL DCM was added dropwise at 0 °C. After stirring at 0 °C for 1 hour, the reaction mixture was stirred at room temperature for 3 hours. After the reaction was completed, the mixture was concentrated to dryness. The residue was re-dissolved in CH<sub>2</sub>Cl<sub>2</sub> (20 mL) and washed successively with H<sub>2</sub>O (2 x 20 mL), followed by saturated aq. NaHCO<sub>3</sub> solution (20 mL). The organic layer was collected and dried over anhydrous Na<sub>2</sub>SO<sub>4</sub>, the solvent was evaporated to give a product **NH<sub>2</sub>- $\alpha$ Man- $\alpha$ Man- $\beta$ Glu-OAc 15** (0.36 g, 98%) which was used directly without further purification. <sup>1</sup>H NMR (500 MHz, CDCl<sub>3</sub>):  $\delta$  = 7.84 (s, 1H), 7.81 (d, *J* = 2.5 Hz, 2H), 6.09 (d, *J* = 2.0 Hz, 2H), 5.96 – 5.90 (m, 5H), 5.47 (dd, *J* = 16.5, 9.0 Hz, 2H), 5.39 (t, *J* = 9.0 Hz, 2H), 5.25 (t, *J* = 9.5 Hz, 1H), 4.69 – 4.59 (m, 6H), 4.35 (dd, *J* = 12.5, 5.0 Hz, 2H), 4.30 (dd, *J* = 12.5, 5.0 Hz, 1H), 4.15 (d, *J* = 10.5 Hz, 1H), 4.07 (dd, *J* = 12.5, 2.0 Hz, 3H), 3.94 – 3.90 (m, 2H), 3.45 (s, 4H), 3.39 (s, 2H), 2.19 (s, 6H), 2.09 – 2.01 (m, 30H), 1.87 (s, 2H). <sup>13</sup>C NMR (125 MHz, CDCl<sub>3</sub>):  $\delta$  = 170.56, 169.94, 169.77, 169.70, 169.52, 169.43, 169.09, 145.63, 145.60, 145.39, 123.23, 121.59, 85.48, 83.72, 74.95, 72.66, 72.24, 72.06, 71.73, 70.25, 68.92, 68.34, 67.80, 65.96, 64.61, 64.45, 61.67, 56.12, 20.78, 20.70, 20.59, 20.53, 20.10. HRMS (ESI): *m/z* calc. for C<sub>55</sub>H<sub>74</sub>N<sub>10</sub>O<sub>30</sub>Na [M+Na]<sup>+</sup>: 1377.44645; found: 1377.44638.

#### **Deprotection of the Boc-Protected compound Boc- $\alpha$ Man- $\beta$ Gal- $\beta$ Gal-OAc (9, ABB)**

Compound **9** (0.25 g, 0.17 mmol) was dissolved in 1 mL DCM and trifluoroacetic acid (0.34 mL) dissolved in 0.34 mL DCM was added dropwise at 0 °C. After stirring at 0 °C for 1 hour, the reaction mixture was stirred at room temperature for 3 hours. After the reaction was completed, the mixture was concentrated to dryness. The residue was re-dissolved in CH<sub>2</sub>Cl<sub>2</sub> (20 mL) and washed successively with H<sub>2</sub>O (2 x 20 mL), followed by saturated aq. NaHCO<sub>3</sub> solution (20 mL). The organic layer was collected and dried over anhydrous Na<sub>2</sub>SO<sub>4</sub>, the solvent was evaporated to give a product **NH<sub>2</sub>- $\alpha$ Man- $\beta$ Gal- $\beta$ Gal-OAc 16** (0.22 g, 97%) which was used directly without further purification. <sup>1</sup>H NMR (500 MHz, CDCl<sub>3</sub>):  $\delta$  = 7.88 (d, *J* = 3.5 Hz, 2H), 7.85 (s, 1H), 6.13 (d, *J* = 1.5 Hz, 1H), 5.95 (dd, *J* = 4.5, 2.0 Hz, 2H), 5.90 (dd, *J* = 9.5, 2.0 Hz, 2H), 5.62 – 5.56 (m, 2H), 5.55 (d, *J* = 3.5 Hz, 2H), 5.42 (t, *J* = 9.5 Hz, 1H), 5.28 (dd, *J* = 10.5, 3.5 Hz, 2H), 4.66 – 4.58

(m, 6H), 4.37 – 4.33 (m, 1H), 4.28 (t,  $J = 6.5$  Hz, 2H), 4.16 (dd,  $J = 11.5, 5.0$  Hz, 4H), 4.08 – 4.05 (m, 1H), 3.96 – 3.92 (m, 1H), 3.47 – 3.40 (m, 6H), 2.21 (d,  $J = 7.5$  Hz, 9H), 2.09 – 2.00 (m, 27H), 1.96 (s, 2H).  $^{13}\text{C}$  NMR (125 MHz,  $\text{CDCl}_3$ ):  $\delta = 170.66, 170.48, 170.20, 169.95, 169.79, 169.67, 169.27, 145.67, 145.44, 123.51, 121.72, 86.11, 83.85, 74.00, 72.31, 72.11, 71.79, 70.89, 69.06, 68.52, 68.04, 67.07, 65.98, 64.73, 64.56, 61.78, 61.28, 56.25, 29.76, 20.76, 20.59, 20.28$ . HRMS (ESI):  $m/z$  calc. for  $\text{C}_{55}\text{H}_{74}\text{N}_{10}\text{O}_{30}\text{Na}$   $[\text{M}+\text{Na}]^+$ : 1377.44645; found: 1377.44640.

#### Deprotection of the Boc-Protected compound Boc- $\alpha$ Man- $\beta$ Glu- $\beta$ Glu-OAc (10, ACC)

Compound **10** (0.37 g, 0.25 mmol) was dissolved in 1 mL DCM and trifluoroacetic acid (0.50 mL) dissolved in 0.50 mL DCM was added dropwise at 0 °C. After stirring at 0 °C for 1 hour, the reaction mixture was stirred at room temperature for 3 hours. After the reaction was completed, the mixture was concentrated to dryness. The residue was re-dissolved in  $\text{CH}_2\text{Cl}_2$  (20 mL) and washed successively with  $\text{H}_2\text{O}$  (2 x 20 mL), followed by saturated aq.  $\text{NaHCO}_3$  solution (20 mL). The organic layer was collected and dried over anhydrous  $\text{Na}_2\text{SO}_4$ , the solvent was evaporated to give a product **NH<sub>2</sub>- $\alpha$ Man- $\beta$ Glu- $\beta$ Glu-OAc 17** (0.32 g, 93%) which was used directly without further purification.  $^1\text{H}$  NMR (500 MHz,  $\text{CDCl}_3$ ):  $\delta = 7.91$  (d,  $J = 4.0$  Hz, 2H), 7.81 (s, 1H), 6.11 (d,  $J = 2.0$  Hz, 1H), 5.97 – 5.92 (m, 4H), 5.51 (td,  $J = 9.5, 3.5$  Hz, 2H), 5.43 (dd,  $J = 18.0, 8.5$  Hz, 3H), 5.30 (t,  $J = 10.0$  Hz, 2H), 4.66 – 4.60 (m, 6H), 4.37 – 4.29 (m, 3H), 4.16 (d,  $J = 12.5$  Hz, 2H), 4.09 – 4.05 (m, 3H), 3.96 – 3.92 (m, 1H), 3.46 – 3.40 (m, 6H), 2.20 (s, 3H), 2.13 – 1.98 (m, 33H), 1.75 (s, 2H).  $^{13}\text{C}$  NMR (125 MHz,  $\text{CDCl}_3$ ):  $\delta = 170.63, 170.04, 169.87, 169.76, 169.54, 169.07, 145.77, 145.68, 123.26, 121.51, 85.62, 83.81, 75.07, 72.80, 72.55, 72.14, 70.37, 68.98, 68.47, 67.88, 66.03, 64.74, 64.65, 61.70, 56.11, 20.75, 20.65, 20.60, 20.17$ . HRMS (ESI):  $m/z$  calc. for  $\text{C}_{55}\text{H}_{74}\text{N}_{10}\text{O}_{30}\text{Na}$   $[\text{M}+\text{Na}]^+$ : 1377.44645; found: 1377.44628.

#### Deprotection of the Boc-Protected compound Boc- $\beta$ Gal- $\beta$ Gal- $\beta$ Gal-OAc (11, BBB)

Compound **11** (0.25 g, 0.17 mmol) was dissolved in 1 mL DCM and trifluoroacetic acid (0.34 mL) dissolved in 0.34 mL DCM was added dropwise at 0 °C. After stirring at 0 °C for 1 hour, the reaction mixture was stirred at room temperature for 3 hours. After the reaction was completed, the mixture was concentrated to dryness. The residue was re-dissolved in  $\text{CH}_2\text{Cl}_2$  (20 mL) and washed successively with  $\text{H}_2\text{O}$  (2 x 20 mL), followed by saturated aq.  $\text{NaHCO}_3$  solution (20 mL). The organic layer was collected and dried over anhydrous  $\text{Na}_2\text{SO}_4$ , the solvent was evaporated to give a product **NH<sub>2</sub>- $\beta$ Gal- $\beta$ Gal- $\beta$ Gal-OAc 21** (0.22 g, 97%) which was used directly without further purification.  $^1\text{H}$  NMR (500 MHz,  $\text{CDCl}_3$ ):  $\delta = 7.85$  (s, 3H), 5.91 (d,  $J = 9.0$  Hz, 3H), 5.61 – 5.51 (m, 6H), 5.28 (d,  $J = 1.5$  Hz, 8H), 4.62 (d,  $J = 3.5$  Hz, 7H), 4.27 (t,  $J = 6.5$  Hz, 3H), 4.16 (d,  $J = 6.5$  Hz, 6H), 3.39 (d,  $J = 10.0$  Hz, 6H), 2.19 (d,  $J = 1.5$  Hz, 10H), 2.01 (d,  $J = 2.0$  Hz, 21H), 1.98 (d,  $J = 1.5$  Hz, 9H), 1.79 (d,  $J = 1.5$  Hz, 10H).  $^{13}\text{C}$  NMR (125 MHz,  $\text{CDCl}_3$ ):  $\delta = 170.49, 170.11, 169.10, 145.68$  (s, 2H), 121.71 (s, 3H), 86.13 (s, 3H), 73.99 (s, 3H), 72.37, 70.94, 68.10, 67.03, 64.81, 61.25, 53.61, 21.05, 20.34. HRMS (ESI):  $m/z$  calc. for  $\text{C}_{55}\text{H}_{74}\text{N}_{10}\text{O}_{30}\text{Na}$   $[\text{M}+\text{Na}]^+$ : 1377.44645; found: 1377.44642.

#### Deprotection of the Boc-Protected compound Boc- $\beta$ Glu- $\beta$ Glu- $\beta$ Glu-OAc (12, CCC)

Compound **12** (0.37 g, 0.25 mmol) was dissolved in 1 mL DCM and trifluoroacetic acid (0.50 mL) dissolved in 0.50 mL DCM was added dropwise at 0 °C. After stirring at 0 °C for 1 hour, the reaction mixture was stirred at room temperature for 3 hours. After the reaction was completed,

the mixture was concentrated to dryness. The residue was re-dissolved in CH<sub>2</sub>Cl<sub>2</sub> (20 mL) and washed successively with H<sub>2</sub>O (2 x 20 mL), followed by saturated aq. NaHCO<sub>3</sub> solution (20 mL). The organic layer was collected and dried over anhydrous Na<sub>2</sub>SO<sub>4</sub>, the solvent was evaporated to give a product **NH<sub>2</sub>-βGlu-βGlu-βGlu-OAc 22** (0.32 g, 93%) which was used directly without further purification. <sup>1</sup>H NMR (500 MHz, CDCl<sub>3</sub>): δ = 7.92 (s, 3H), 5.96 (d, *J* = 9.5 Hz, 3H), 5.50 (t, *J* = 9.5 Hz, 7H), 5.41 (t, *J* = 9.5 Hz, 3H), 5.30 (t, *J* = 9.5 Hz, 6H), 5.26 (d, *J* = 0.5 Hz, 2H), 4.60 (s, 7H), 4.28 (dd, *J* = 12.5, 5.0 Hz, 4H), 4.12 (d, *J* = 12.0 Hz, 7H), 3.69 – 3.62 (m, 3H), 3.40 (d, *J* = 5.5 Hz, 7H), 2.04 (s, 34H), 2.00 (d, *J* = 3.0 Hz, 18H), 1.78 (s, 10H). <sup>13</sup>C NMR (125 MHz, CDCl<sub>3</sub>): δ = 170.68, 170.11, 169.59, 168.99, 145.86, 121.48, 85.66, 75.09, 72.87, 72.38, 70.40, 67.88, 64.85, 61.72, 58.28, 53.60, 20.99, 20.21. HRMS (ESI): *m/z* calc. for C<sub>55</sub>H<sub>74</sub>N<sub>10</sub>O<sub>30</sub>Na [M+Na]<sup>+</sup>: 1377.44645; found: 1377.44644.

### Synthesis of Pentafluorophenyl acrylate (PFPA)

PFPA was synthesized according to the general procedure published recently.<sup>4</sup> To the solution of pentafluorophenol (0.62 g, 3.37 mmol) in anhydrous DCM (6 mL) at 0 °C was added dropwise freshly distilled trimethylamine (0.55 mL, 3.97 mmol). The mixture was stirred at 0 °C for 15 min, and then acryloyl chloride (0.32 mL, 3.97 mmol) was added dropwise. After stirred at 0 °C for further 30 min, the reaction mixture was allowed to stir at room temperature for 2 h. After completion of the reaction, the reaction mixture was diluted with DCM, filtered, and washed with DCM. The filtrate was extracted twice with brine. The organic phase was dried over anhydrous Na<sub>2</sub>SO<sub>4</sub>, filtered, concentrated. The residue was purified by SGC chromatography (100% petroleum ether) to give the product PFPA as a colorless oil (0.56 g, 70% yield). <sup>1</sup>H NMR (500 MHz, CDCl<sub>3</sub>): δ = 6.72 (d, *J* = 17.0 Hz, 1H), 6.37 (dd, *J* = 17.5, 10.5 Hz, 1H), 6.18 (d, *J* = 10.5 Hz, 1H). <sup>19</sup>F NMR (470 MHz, CDCl<sub>3</sub>): δ = -152.52 (m, 2F, *ortho*), -158.08 (t, 1F, *para*), -162.26 (m, 2F, *meta*).

### Synthesis of P(αMan-αMan-αMan-OAc)

Into a solution of pPFPA (30 mg, 0.13 mmol) and NH<sub>2</sub>-αMan-αMan-αMan-OAc **13** (239.1 mg, 0.18 mmol) in dry DMF (2 mL) was added dimethylaminopyridine (DMAP) (7.7 mg, 0.06 mmol) under nitrogen atmosphere. The reaction mixture was allowed to stir at 65 °C for 24 hours in nitrogen-filled glove box. After the completion of the reaction, the reaction solution was precipitated in diethyl ether, centrifuged to obtain the crude glycopolymer, then redissolved in THF, precipitated again twice into diethyl ether, centrifuged, and finally dried in a vacuum oven at 40 °C. The product **P(αMan-αMan-αMan-OAc)** was obtained as light yellow powder (99.5 mg, 56%). There was no fluorine signal in the <sup>19</sup>F NMR of the product. FT-IR (KBr, cm<sup>-1</sup>): 1754 (C=O stretching of OAc ester), 1652 (C=O stretching of carbonyl in amide bond).

### Synthesis of P(αMan-αMan-βGal-OAc)

Into a solution of pPFPA (30 mg, 0.13 mmol) and NH<sub>2</sub>-αMan-αMan-βGal-OAc **14** (239.1 mg, 0.18 mmol) in dry DMF (2 mL) was added dimethylaminopyridine (DMAP) (7.7 mg, 0.06 mmol) under nitrogen atmosphere. The reaction mixture was allowed to stir at 65 °C for 24 hours in nitrogen-filled glove box. After the completion of the reaction, the reaction solution was precipitated in diethyl ether, centrifuged to obtain the crude glycopolymer, then redissolved in THF, precipitated again twice into diethyl ether, centrifuged, and finally dried in a vacuum oven at

40 °C. The product **P( $\alpha$ Man- $\alpha$ Man- $\beta$ Gal-OAc)** was obtained as light yellow powder (97.7 mg, 55%). There was no fluorine signal in the  $^{19}\text{F}$  NMR of the product. FT-IR (KBr,  $\text{cm}^{-1}$ ): 1754 (C=O stretching of OAc ester), 1652 (C=O stretching of carbonyl in amide bond).

#### Synthesis of **P( $\alpha$ Man- $\alpha$ Man- $\beta$ Glu-OAc)**

Into a solution of pPFPA (30 mg, 0.13 mmol) and  $\text{NH}_2$ - $\alpha$ Man- $\alpha$ Man- $\beta$ Glu-OAc **15** (239.1 mg, 0.18 mmol) in dry DMF (2 mL) was added dimethylaminopyridine (DMAP) (7.7 mg, 0.06 mmol) under nitrogen atmosphere. The reaction mixture was allowed to stir at 65 °C for 24 hours in nitrogen-filled glove box. After the completion of the reaction, the reaction solution was precipitated in diethyl ether, centrifuged to obtain the crude glycopolymer, then redissolved in THF, precipitated again twice into diethyl ether, centrifuged, and finally dried in a vacuum oven at 40 °C. The product **P( $\alpha$ Man- $\alpha$ Man- $\beta$ Glu-OAc)** was obtained as light yellow powder (103.0 mg, 58%). There was no fluorine signal in the  $^{19}\text{F}$  NMR of the product. FT-IR (KBr,  $\text{cm}^{-1}$ ): 1753 (C=O stretching of OAc ester), 1652 (C=O stretching of carbonyl in amide bond).

#### Synthesis of **P( $\alpha$ Man- $\beta$ Gal- $\beta$ Gal-OAc)**

Into a solution of pPFPA (30 mg, 0.13 mmol) and  $\text{NH}_2$ - $\alpha$ Man- $\beta$ Gal- $\beta$ Gal-OAc **16** (239.1 mg, 0.18 mmol) in dry DMF (2 mL) was added dimethylaminopyridine (DMAP) (7.7 mg, 0.06 mmol) under nitrogen atmosphere. The reaction mixture was allowed to stir at 65 °C for 24 hours in nitrogen-filled glove box. After the completion of the reaction, the reaction solution was precipitated in diethyl ether, centrifuged to obtain the crude glycopolymer, then redissolved in THF, precipitated again twice into diethyl ether, centrifuged, and finally dried in a vacuum oven at 40 °C. The product **P( $\alpha$ Man- $\beta$ Gal- $\beta$ Gal-OAc)** was obtained as light yellow powder (99.4 mg, 56%). There was no fluorine signal in the  $^{19}\text{F}$  NMR of the product. FT-IR (KBr,  $\text{cm}^{-1}$ ): 1754 (C=O stretching of OAc ester), 1652 (C=O stretching of carbonyl in amide bond).

#### Synthesis of **P( $\alpha$ Man- $\beta$ Glu- $\beta$ Glu-OAc)**

Into a solution of pPFPA (30 mg, 0.13 mmol) and  $\text{NH}_2$ - $\alpha$ Man- $\beta$ Glu- $\beta$ Glu-OAc **17** (239.1 mg, 0.18 mmol) in dry DMF (2 mL) was added dimethylaminopyridine (DMAP) (7.7 mg, 0.06 mmol) under nitrogen atmosphere. The reaction mixture was allowed to stir at 65 °C for 24 hours in nitrogen-filled glove box. After the completion of the reaction, the reaction solution was precipitated in diethyl ether, centrifuged to obtain the crude glycopolymer, then redissolved in THF, precipitated again twice into diethyl ether, centrifuged, and finally dried in a vacuum oven at 40 °C. The product **P( $\alpha$ Man- $\beta$ Glu- $\beta$ Glu-OAc)** was obtained as light yellow powder (103.0 mg, 58%). There was no fluorine signal in the  $^{19}\text{F}$  NMR of the product. FT-IR (KBr,  $\text{cm}^{-1}$ ): 1754 (C=O stretching of OAc ester), 1651 (C=O stretching of carbonyl in amide bond).

#### Synthesis of **P( $\alpha$ Man- $\alpha$ Man-yne-OAc)**

Into a solution of pPFPA (50 mg, 0.21 mmol) and  $\text{NH}_2$ - $\alpha$ Man- $\alpha$ Man-yne-OAc **19** (288.7 mg, 0.29 mmol) in dry DMF (4 mL) was added dimethylaminopyridine (DMAP) (12.8 mg, 0.10 mmol) under nitrogen atmosphere. The reaction mixture was allowed to stir at 65 °C for 24 hours in nitrogen-filled glove box. After the completion of the reaction, the reaction solution was precipitated in diethyl ether, centrifuged to obtain the crude glycopolymer, then redissolved in



THF, precipitated again twice into diethyl ether, centrifuged, and finally dried in a vacuum oven at 40 °C. The product **P( $\alpha$ Man- $\alpha$ Man-yne-OAc)** was obtained as light yellow powder (119.7 mg, 55%). There was no fluorine signal in the  $^{19}\text{F}$  NMR of the product. FT-IR (KBr,  $\text{cm}^{-1}$ ): 1754 (C=O stretching of OAc ester), 1651 (C=O stretching of carbonyl in amide bond).

#### Synthesis of **P( $\alpha$ Man-yne-yne-OAc)**

Into a solution of pPFPA (50 mg, 0.21 mmol) and  $\text{NH}_2$ - $\alpha$ Man-yne-yne-OAc **20** (179.9 mg, 0.29 mmol) in dry DMF (4 mL) was added dimethylaminopyridine (DMAP) (12.8 mg, 0.10 mmol) under nitrogen atmosphere. The reaction mixture was allowed to stir at 65 °C for 24 hours in nitrogen-filled glove box. After the completion of the reaction, the reaction solution was precipitated in diethyl ether, centrifuged to obtain the crude glycopolymer, then redissolved in THF, precipitated again twice into diethyl ether, centrifuged, and finally dried in a vacuum oven at 40 °C. The product **P( $\alpha$ Man-yne-yne-OAc)** was obtained as light yellow powder (77.9 mg, 56%). There was no fluorine signal in the  $^{19}\text{F}$  NMR of the product. FT-IR (KBr,  $\text{cm}^{-1}$ ): 1755 (C=O stretching of OAc ester), 1651 (C=O stretching of carbonyl in amide bond).

#### Synthesis of **P( $\beta$ Gal- $\beta$ Gal- $\beta$ Gal-OAc)**

Into a solution of pPFPA (30 mg, 0.13 mmol) and  $\text{NH}_2$ - $\beta$ Gal- $\beta$ Gal- $\beta$ Gal-OAc **21** (239.1 mg, 0.18 mmol) in dry DMF (2 mL) was added dimethylaminopyridine (DMAP) (7.7 mg, 0.06 mmol) under nitrogen atmosphere. The reaction mixture was allowed to stir at 65 °C for 24 hours in nitrogen-filled glove box. After the completion of the reaction, the reaction solution was precipitated in diethyl ether, centrifuged to obtain the crude glycopolymer. then redissolved in THF, precipitated again twice into diethyl ether, centrifuged, and finally dried in a vacuum oven at 40 °C. The product **P( $\beta$ Gal- $\beta$ Gal- $\beta$ Gal-OAc)** was obtained as light yellow powder (99.3 mg, 56%). There was no fluorine signal in the  $^{19}\text{F}$  NMR of the product. FT-IR (KBr,  $\text{cm}^{-1}$ ): 1754 (C=O stretching of OAc ester), 1652 (C=O stretching of carbonyl in amide bond).

#### Synthesis of **P( $\beta$ Glu- $\beta$ Glu- $\beta$ Glu-OAc)**

Into a solution of pPFPA (30 mg, 0.13 mmol) and  $\text{NH}_2$ - $\beta$ Glu- $\beta$ Glu- $\beta$ Glu-OAc **22** (239.1 mg, 0.18 mmol) in dry DMF (2 mL) was added dimethylaminopyridine (DMAP) (7.7 mg, 0.06 mmol) under nitrogen atmosphere. The reaction mixture was allowed to stir at 65 °C for 24 hours in nitrogen-filled glove box. After the completion of the reaction, the reaction solution was precipitated in diethyl ether, centrifuged to obtain the crude glycopolymer, then redissolved in THF, precipitated again twice into diethyl ether, centrifuged, and finally dried in a vacuum oven at 40 °C. The product **P( $\beta$ Glu- $\beta$ Glu- $\beta$ Glu-OAc)** was obtained as light yellow powder (103.0 mg, 58%). There was no fluorine signal in the  $^{19}\text{F}$  NMR of the product. FT-IR (KBr,  $\text{cm}^{-1}$ ): 1754 (C=O stretching of OAc ester), 1651 (C=O stretching of carbonyl in amide bond).

#### Synthesis of deacetylated glycopolymer **P( $\alpha$ Man- $\alpha$ Man- $\alpha$ Man) (P1)**

OAc-Protected glycopolymer **P( $\alpha$ Man- $\alpha$ Man- $\alpha$ Man-OAc)** (50 mg, 0.04 mmol) was dissolved in MeOH/DCM (2 mL, 1: 1 v/v) and sodium methoxide (23 mg) in MeOH (0.5 mL) was added at room temperature. The reaction mixture was stirred at room temperature for 1 hour. Subsequently the solvent was evaporated, the residue was redissolved in  $\text{H}_2\text{O}$ , and then the Dowex  $\text{H}^+$  resin was

added to neutralize to pH = 7. The aqueous solution was filtered and purified by dialysis against methyl alcohol (MWCO 3500 Da). The final glycopolymer **P1** P( $\alpha$ Man- $\alpha$ Man- $\alpha$ Man) was obtained after lyophilisation as a pale brown powder (31.5 mg, 98%). FT-IR (KBr,  $\text{cm}^{-1}$ ): 3430 (O-H stretching in carbohydrate), 1645 (C=O stretching of carbonyl in amide bond).

#### **Synthesis of deacetylated glycopolymer P( $\alpha$ Man- $\alpha$ Man- $\beta$ Gal) (P2)**

OAc-Protected glycopolymer P( $\alpha$ Man- $\alpha$ Man- $\beta$ Gal-OAc) (50 mg, 0.04 mmol) was dissolved in MeOH/DCM (2 mL, 1: 1 v/v) and sodium methoxide (23 mg) in MeOH (0.5 mL) was added at room temperature. The reaction mixture was stirred at room temperature for 1 hour. Subsequently the solvent was evaporated, the residue was redissolved in H<sub>2</sub>O, and then the Dowex H<sup>+</sup> resin was added to neutralize to pH = 7. The aqueous solution was filtered and purified by dialysis against methyl alcohol (MWCO 3500 Da). The final glycopolymer **P2** P( $\alpha$ Man- $\alpha$ Man- $\beta$ Gal) was obtained after lyophilisation as a pale brown powder (30.5 mg, 95%). FT-IR (KBr,  $\text{cm}^{-1}$ ): 3433 (O-H stretching in carbohydrate), 1640 (C=O stretching of carbonyl in amide bond).

#### **Synthesis of deacetylated glycopolymer P( $\alpha$ Man- $\alpha$ Man- $\beta$ Glu) (P3)**

OAc-Protected glycopolymer P( $\alpha$ Man- $\alpha$ Man- $\beta$ Glu-OAc) (50 mg, 0.04 mmol) was dissolved in MeOH/DCM (2 mL, 1: 1 v/v) and sodium methoxide (23 mg) in MeOH (0.5 mL) was added at room temperature. The reaction mixture was stirred at room temperature for 1 hour. Subsequently the solvent was evaporated, the residue was redissolved in H<sub>2</sub>O, and then the Dowex H<sup>+</sup> resin was added to neutralize to pH = 7. The aqueous solution was filtered and purified by dialysis against methyl alcohol (MWCO 3500 Da). The final glycopolymer **P3** P( $\alpha$ Man- $\alpha$ Man- $\beta$ Glu) was obtained after lyophilisation as a pale brown powder (31.1 mg, 97%). FT-IR (KBr,  $\text{cm}^{-1}$ ): 3438 (O-H stretching in carbohydrate), 1644 (C=O stretching of carbonyl in amide bond).

#### **Synthesis of deacetylated glycopolymer P( $\alpha$ Man- $\alpha$ Man-yne) (P4)**

OAc-Protected glycopolymer P( $\alpha$ Man- $\alpha$ Man-yne-OAc) (50 mg, 0.05 mmol) was dissolved in MeOH/DCM (2 mL, 1: 1 v/v) and sodium methoxide (21 mg) in MeOH (0.5 mL) was added at room temperature. The reaction mixture was stirred at room temperature for 1 hour. Subsequently the solvent was evaporated, the residue was redissolved in H<sub>2</sub>O, and then the Dowex H<sup>+</sup> resin was added to neutralize to pH = 7. The aqueous solution was filtered and purified by dialysis against methyl alcohol (MWCO 3500 Da). The final glycopolymer **P4** P( $\alpha$ Man- $\alpha$ Man-yne) was obtained after lyophilisation as a pale brown powder (32.4 mg, 97%). FT-IR (KBr,  $\text{cm}^{-1}$ ): 3435 (O-H stretching in carbohydrate), 1646 (C=O stretching of carbonyl in amide bond).

#### **Synthesis of deacetylated glycopolymer P( $\alpha$ Man- $\beta$ Gal- $\beta$ Gal) (P6)**

OAc-Protected glycopolymer P( $\alpha$ Man- $\beta$ Gal- $\beta$ Gal-OAc) (50 mg, 0.04 mmol) was dissolved in MeOH/DCM (2 mL, 1: 1 v/v) and sodium methoxide (23 mg) in MeOH (0.5 mL) was added at room temperature. The reaction mixture was stirred at room temperature for 1 hour. Subsequently the solvent was evaporated, the residue was redissolved in H<sub>2</sub>O, and then the Dowex H<sup>+</sup> resin was added to neutralize to pH = 7. The aqueous solution was filtered and purified by dialysis against methyl alcohol (MWCO 3500 Da). The final glycopolymer **P6** P( $\alpha$ Man- $\beta$ Gal- $\beta$ Gal) was obtained after lyophilisation as a pale brown powder (30.5 mg, 95%). FT-IR (KBr,  $\text{cm}^{-1}$ ): 3422 (O-H

stretching in carbohydrate), 1646 (C=O stretching of carbonyl in amide bond).

#### **Synthesis of deacetylated glycopolymer P( $\alpha$ Man- $\beta$ Glu- $\beta$ Glu) (P7)**

OAc-Protected glycopolymer P( $\alpha$ Man- $\beta$ Glu- $\beta$ Glu-OAc) (50 mg, 0.04 mmol) was dissolved in MeOH/DCM (2 mL, 1: 1 v/v) and sodium methoxide (23 mg) in MeOH (0.5 mL) was added at room temperature. The reaction mixture was stirred at room temperature for 1 hour. Subsequently the solvent was evaporated, the residue was redissolved in H<sub>2</sub>O, and then the Dowex H<sup>+</sup> resin was added to neutralize to pH = 7. The aqueous solution was filtered and purified by dialysis against methyl alcohol (MWCO 3500 Da). The final glycopolymer **P7** P( $\alpha$ Man- $\beta$ Glu- $\beta$ Glu) was obtained after lyophilisation as a pale brown powder (31.1 mg, 97%). FT-IR (KBr, cm<sup>-1</sup>): 3432 (O-H stretching in carbohydrate), 1644 (C=O stretching of carbonyl in amide bond).

#### **Synthesis of deacetylated glycopolymer P( $\alpha$ Man-yne-yne) (P8)**

OAc-Protected glycopolymer P( $\alpha$ Man-yne-yne-OAc) (50 mg, 0.08 mmol) was dissolved in MeOH/DCM (2 mL, 1: 1 v/v) and sodium methoxide (16 mg) in MeOH (0.5 mL) was added at room temperature. The reaction mixture was stirred at room temperature for 1 hour. Subsequently the solvent was evaporated, the residue was redissolved in H<sub>2</sub>O, and then the Dowex H<sup>+</sup> resin was added to neutralize to pH = 7. The aqueous solution was filtered and purified by dialysis against methyl alcohol (MWCO 3500 Da). The final glycopolymer **P8** P( $\alpha$ Man-yne-yne) was obtained after lyophilisation as a pale brown powder (35.8 mg, 96%). FT-IR (KBr, cm<sup>-1</sup>): 3437 (O-H stretching in carbohydrate), 1649 (C=O stretching of carbonyl in amide bond).

#### **Synthesis of deacetylated glycopolymer P( $\beta$ Gal- $\beta$ Gal- $\beta$ Gal) (P9)**

OAc-Protected glycopolymer P( $\beta$ Gal- $\beta$ Gal- $\beta$ Gal-OAc) (50 mg, 0.04 mmol) was dissolved in MeOH/DCM (2 mL, 1: 1 v/v) and sodium methoxide (23 mg) in MeOH (0.5 mL) was added at room temperature. The reaction mixture was stirred at room temperature for 1 hour. Subsequently the solvent was evaporated, the residue was redissolved in H<sub>2</sub>O, and then the Dowex H<sup>+</sup> resin was added to neutralize to pH = 7. The aqueous solution was filtered and purified by dialysis against methyl alcohol (MWCO 3500 Da). The final glycopolymer **P9** P( $\beta$ Gal- $\beta$ Gal- $\beta$ Gal) was obtained after lyophilisation as a pale brown powder (30.5 mg, 95%). FT-IR (KBr, cm<sup>-1</sup>): 3422 (O-H stretching in carbohydrate), 1646 (C=O stretching of carbonyl in amide bond).

#### **Synthesis of deacetylated glycopolymer P( $\beta$ Glu- $\beta$ Glu- $\beta$ Glu) (P10)**

OAc-Protected glycopolymer P( $\beta$ Glu- $\beta$ Glu- $\beta$ Glu-OAc) (50 mg, 0.04 mmol) was dissolved in MeOH/DCM (2 mL, 1: 1 v/v) and sodium methoxide (23 mg) in MeOH (0.5 mL) was added at room temperature. The reaction mixture was stirred at room temperature for 1 hour. Subsequently the solvent was evaporated, the residue was redissolved in H<sub>2</sub>O, and then the Dowex H<sup>+</sup> resin was added to neutralize to pH = 7. The aqueous solution was filtered and purified by dialysis against methyl alcohol (MWCO 3500 Da). The final glycopolymer **P10** P( $\beta$ Glu- $\beta$ Glu- $\beta$ Glu) was obtained after lyophilisation as a pale brown powder (31.1 mg, 97%). FT-IR (KBr, cm<sup>-1</sup>): 3432 (O-H stretching in carbohydrate), 1644 (C=O stretching of carbonyl in amide bond).

### **1.3 References**

- 1 A. Bianchi and A. Bernardi, *J. Org. Chem.*, 2006, **71**, 4565-4577.
- 2 V. Percec, P. Leowanawat, H.-J. Sun, O. Kulikov, C. D. Nusbaum, T. M. Tran, A. Bertin, D. A. Wilson, M. Peterca, S. Zhang, N. P. Kamat, K. Vargo, D. Mooock, E. D. Johnston, D. A. Hammer, D. J. Pochan, Y. Chen, Y. M. Chabre, T. C. Shiao, M. Bergeron-Brlek, S. André, R. Roy, H.-J. Gabius and P. A. Heiney, *J. Am. Chem. Soc.*, 2013, **135**, 9055-9077.
- 3 Y. M. Chabre, C. Contino-Pépin, V. Placide, T. C. Shiao and R. Roy, *J. Org. Chem.*, 2008, **73**, 5602-5605.
- 4 W. Graisuwan, H. Zhao, S. Kiatkamjornwong, P. Theato and V. P. Hoven, *J. Polym. Sci.*, 2015, **53**, 1103-1113

## 2. Copies of NMR spectra of compounds and glycopolymers

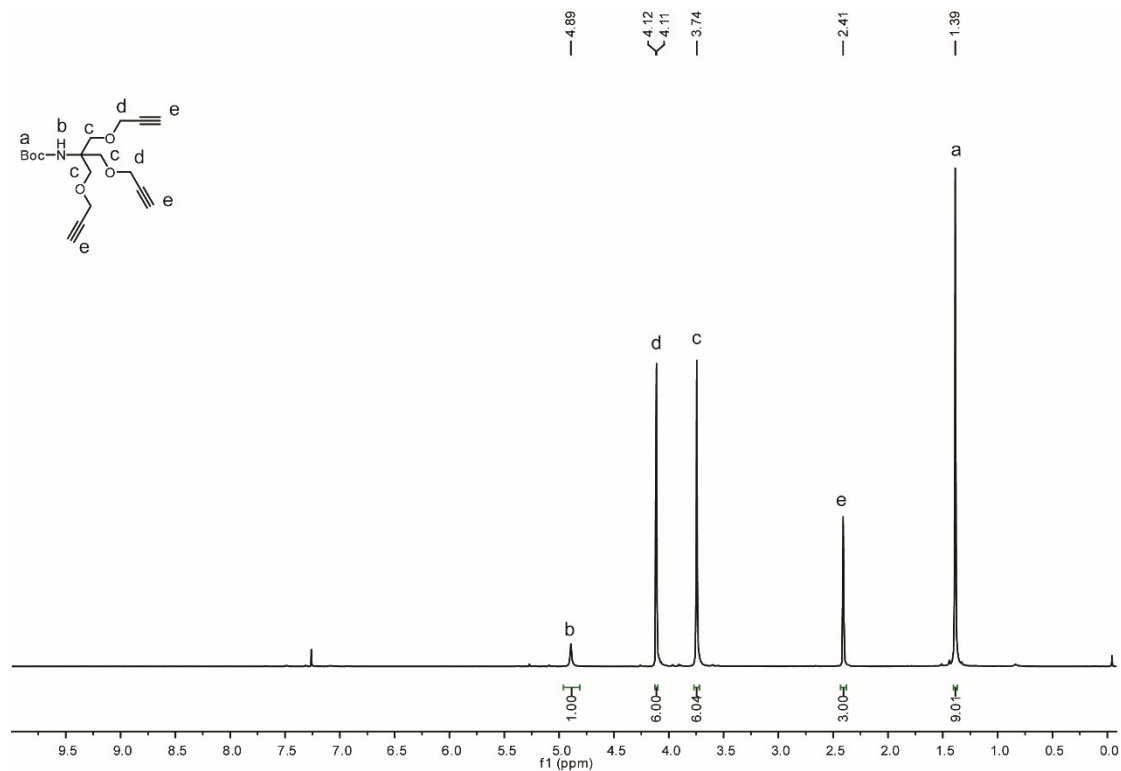

Figure S1. <sup>1</sup>H NMR spectrum of Compound 1 in CDCl<sub>3</sub>.

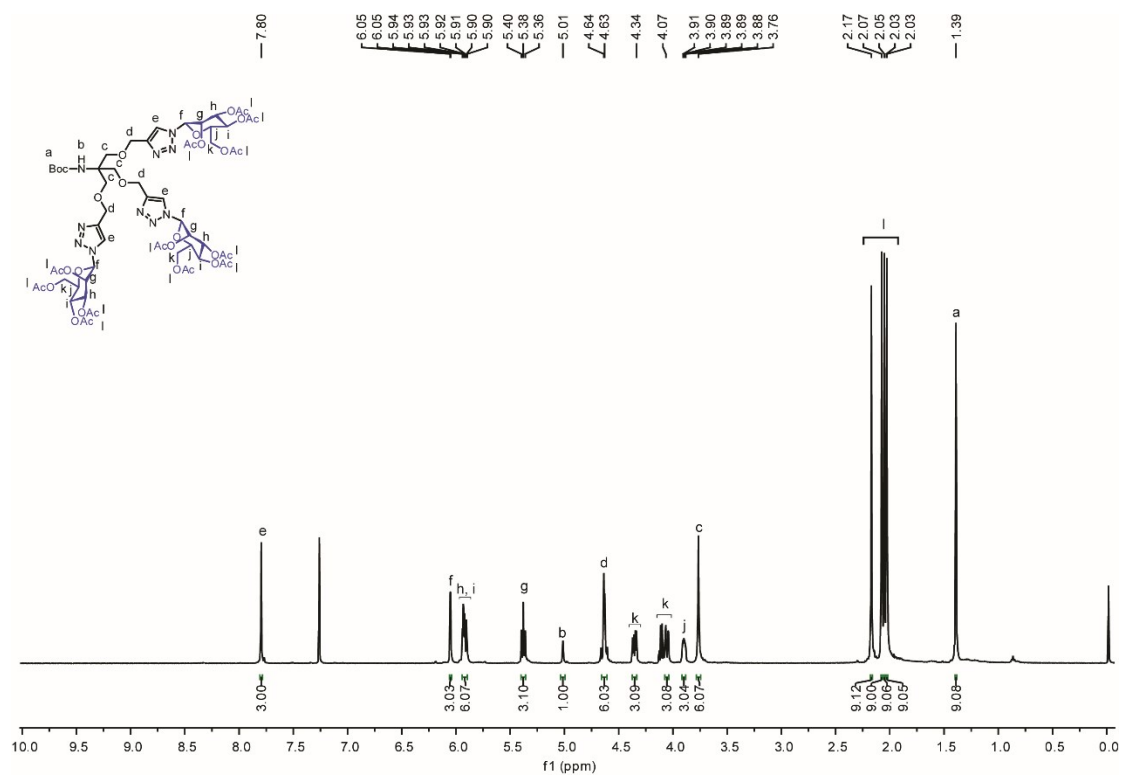

Figure S2. <sup>1</sup>H NMR spectrum of Compound 2 in CDCl<sub>3</sub>.

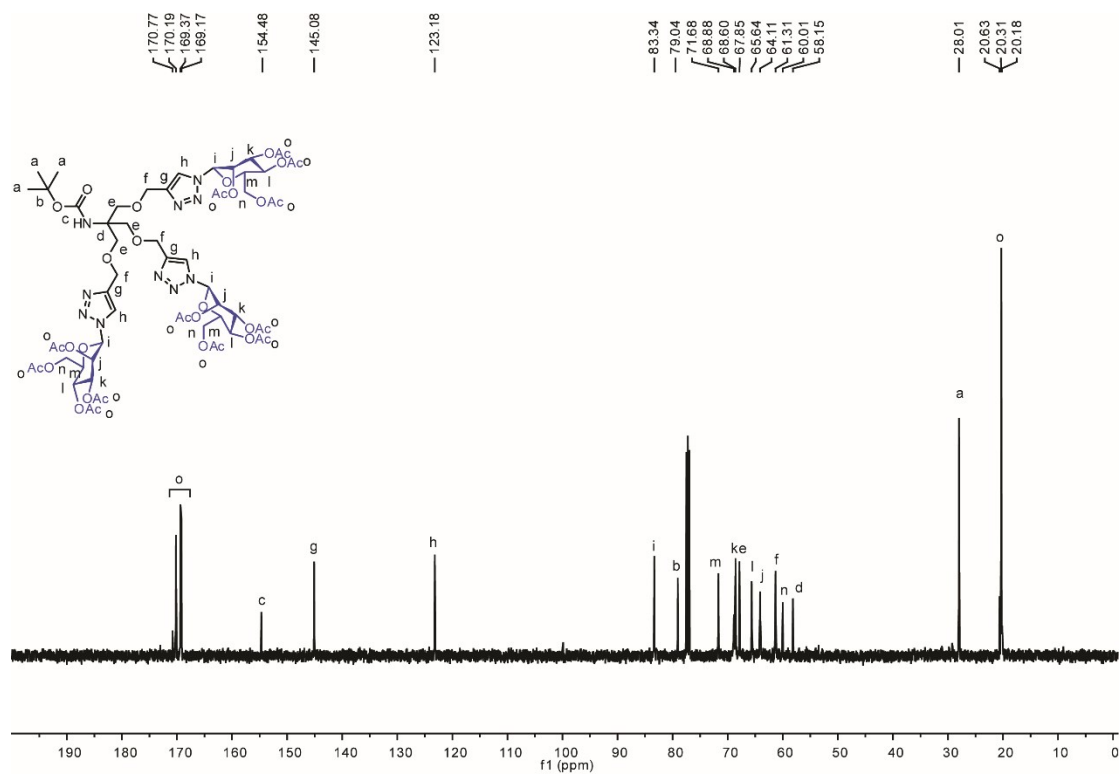

Figure S3. <sup>13</sup>C NMR spectrum of compound 2 in CDCl<sub>3</sub>

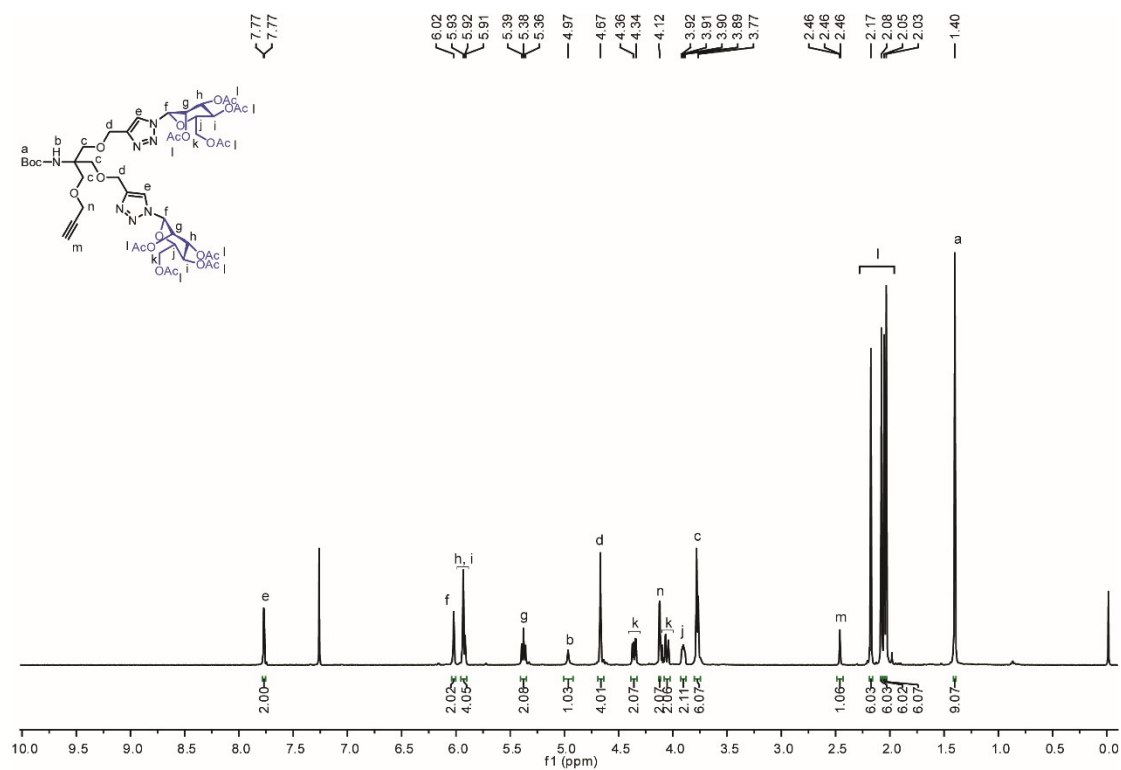

Figure S4. <sup>1</sup>H NMR spectrum of Compound 3 in CDCl<sub>3</sub>

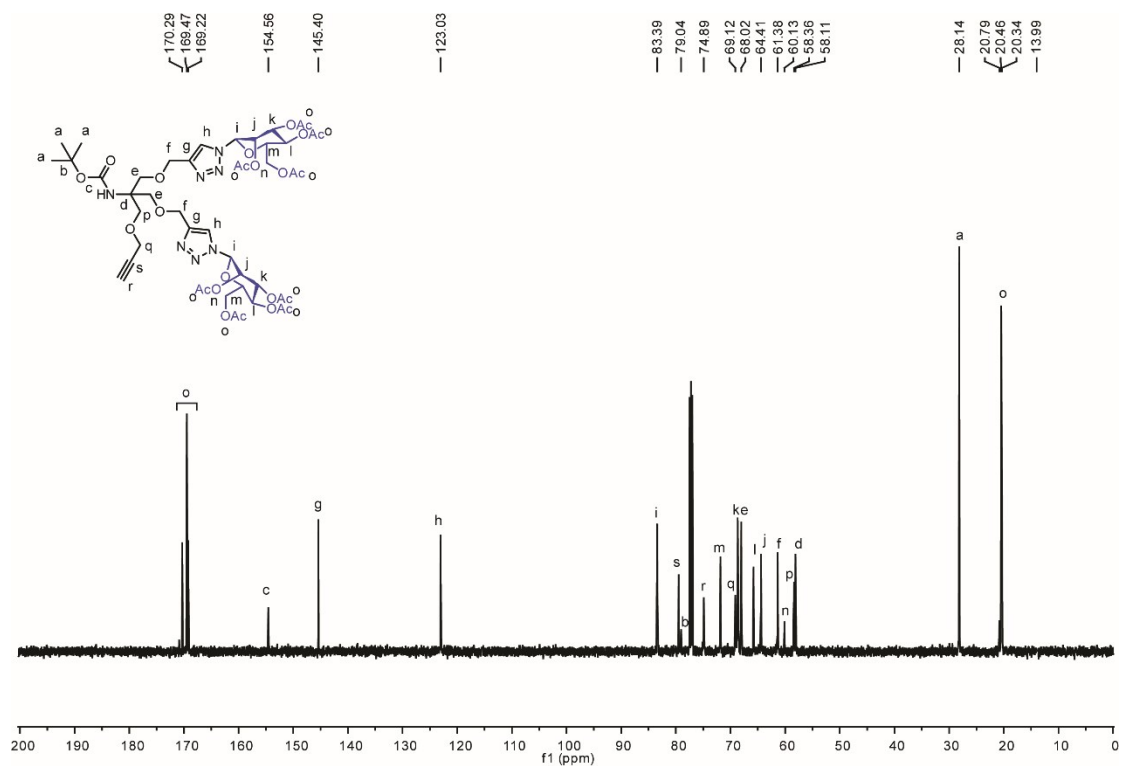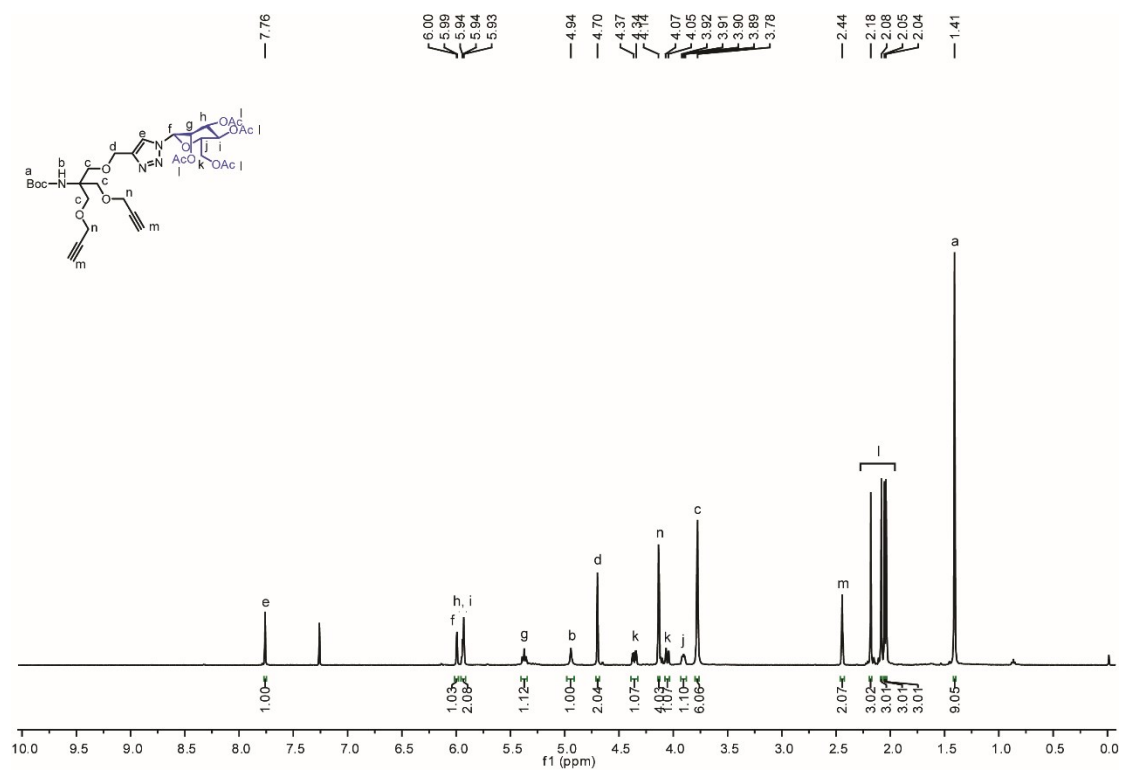

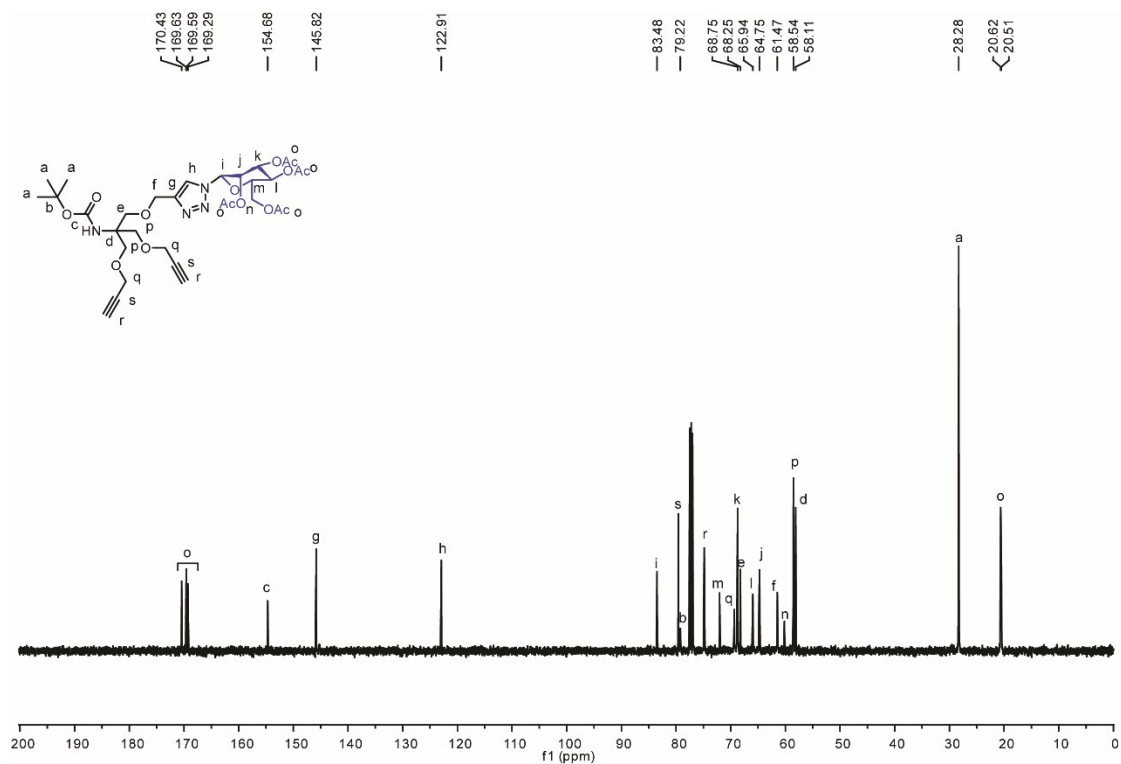

Figure S7.  $^{13}\text{C}$  NMR spectrum of compound **4** in  $\text{CDCl}_3$

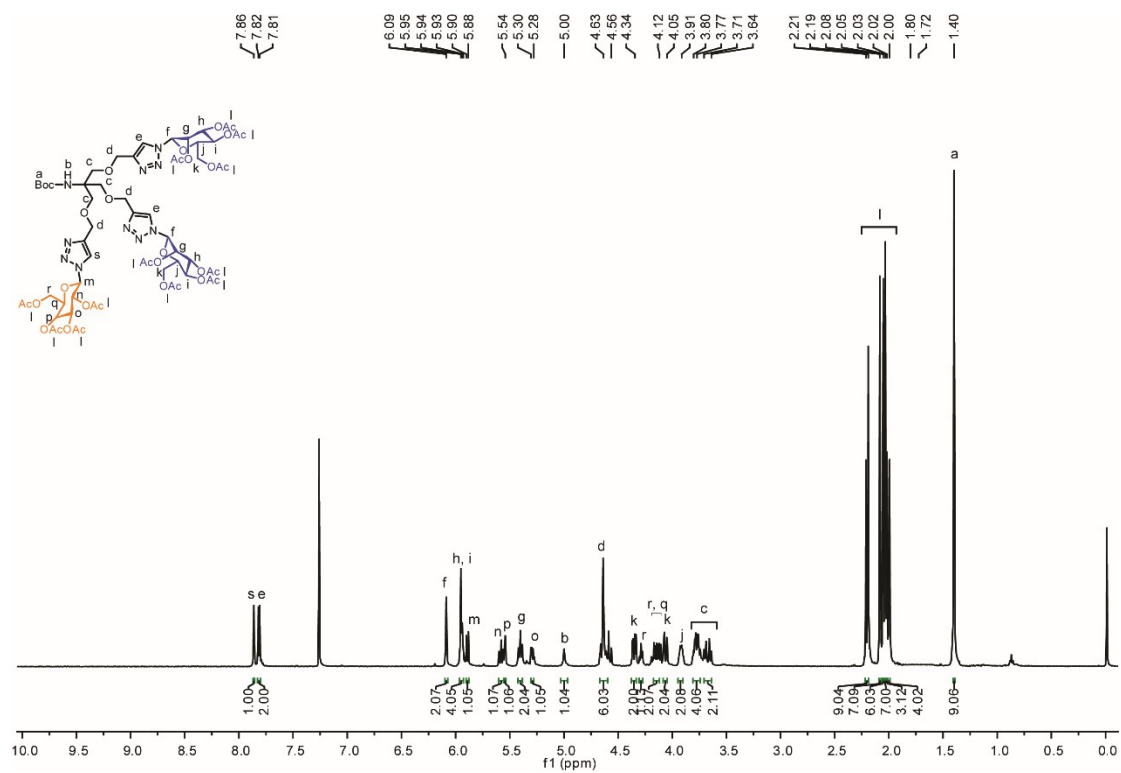

Figure S8.  $^1\text{H}$  NMR spectrum of Compound **5** in  $\text{CDCl}_3$



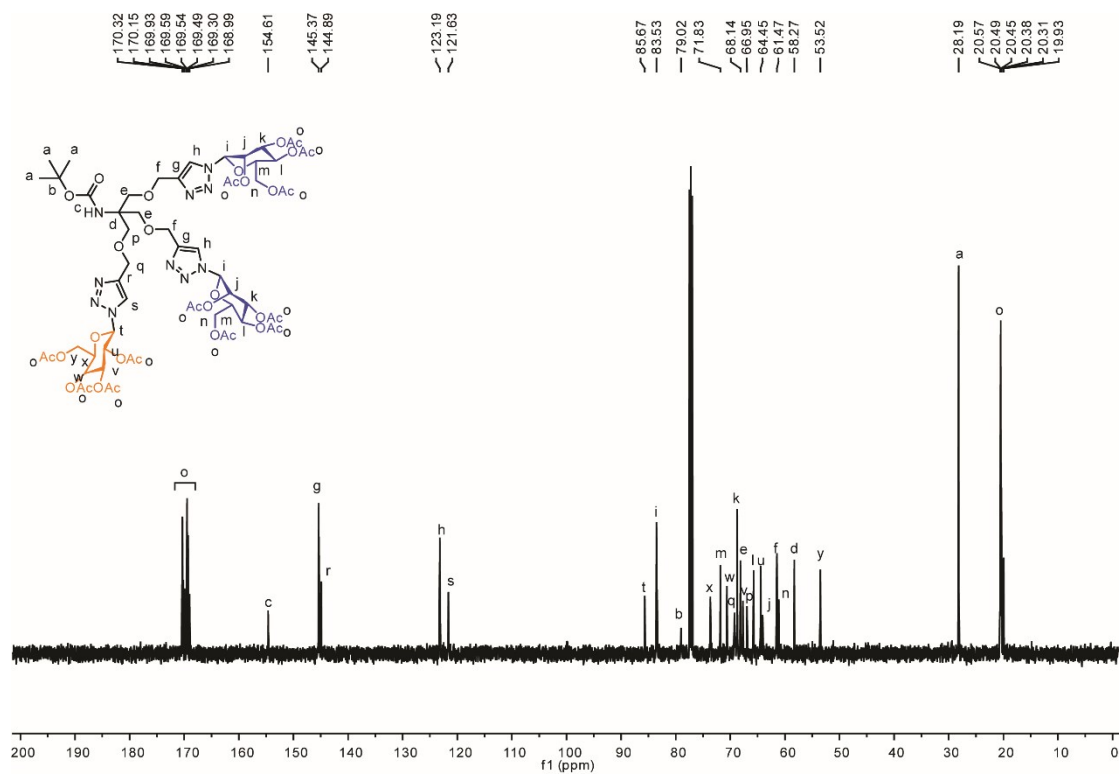

Figure S9.  $^{13}\text{C}$  NMR spectrum of compound **5** in  $\text{CDCl}_3$

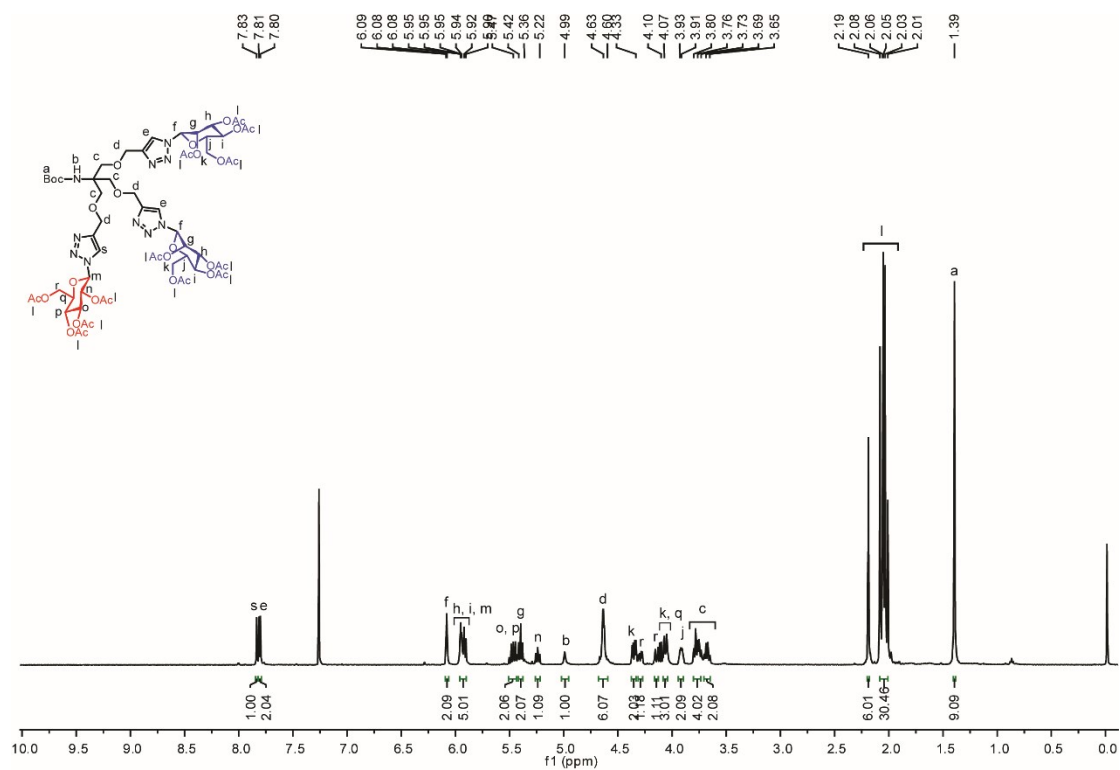

Figure S10.  $^1\text{H}$  NMR spectrum of Compound **6** in  $\text{CDCl}_3$

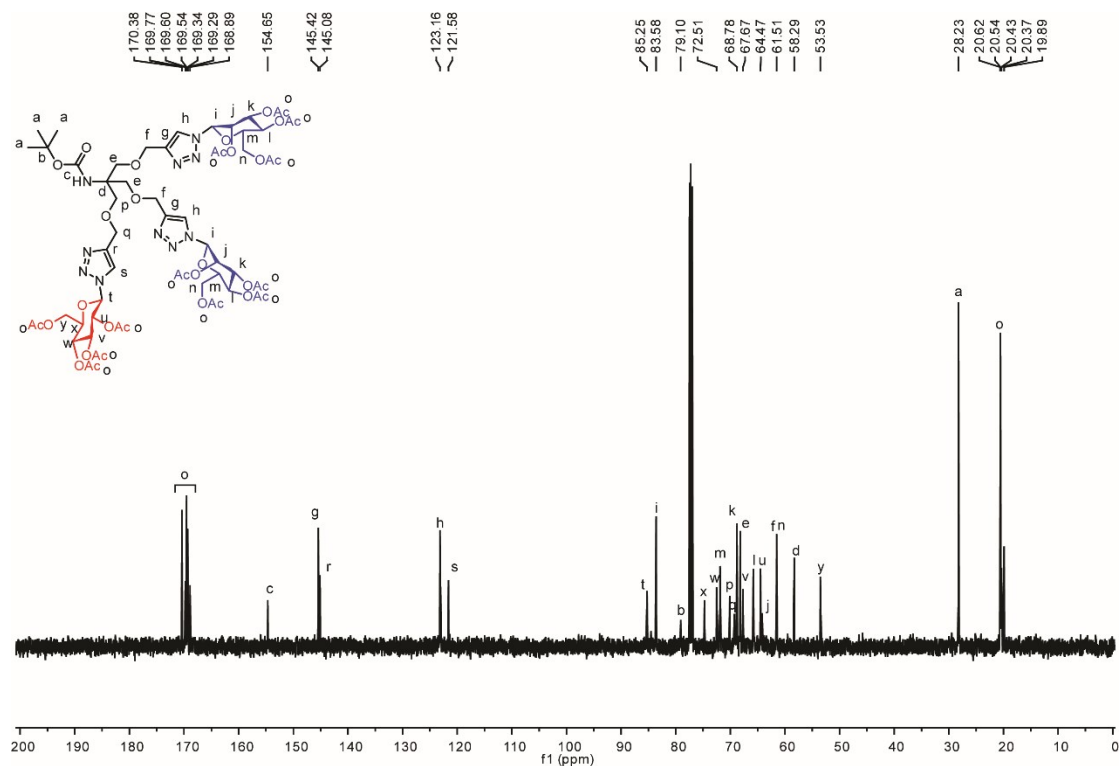

Figure S11.  $^{13}\text{C}$  NMR spectrum of compound **6** in  $\text{CDCl}_3$

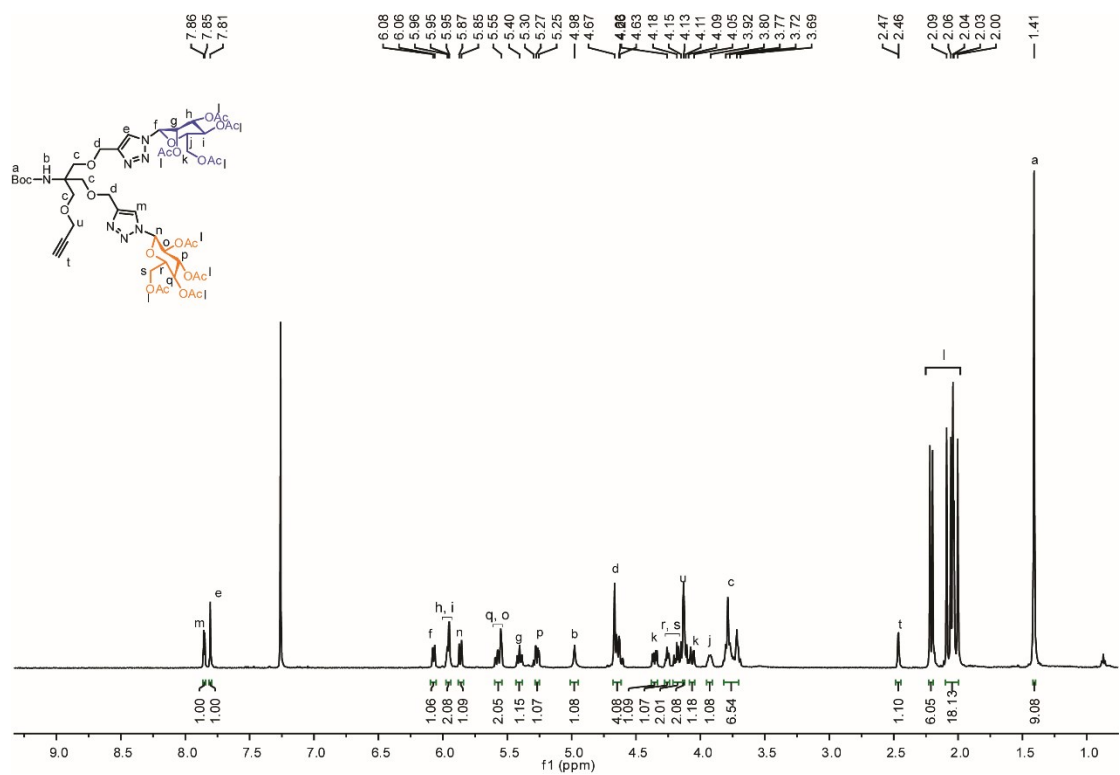

Figure S12.  $^1\text{H}$  NMR spectrum of Compound **7** in  $\text{CDCl}_3$

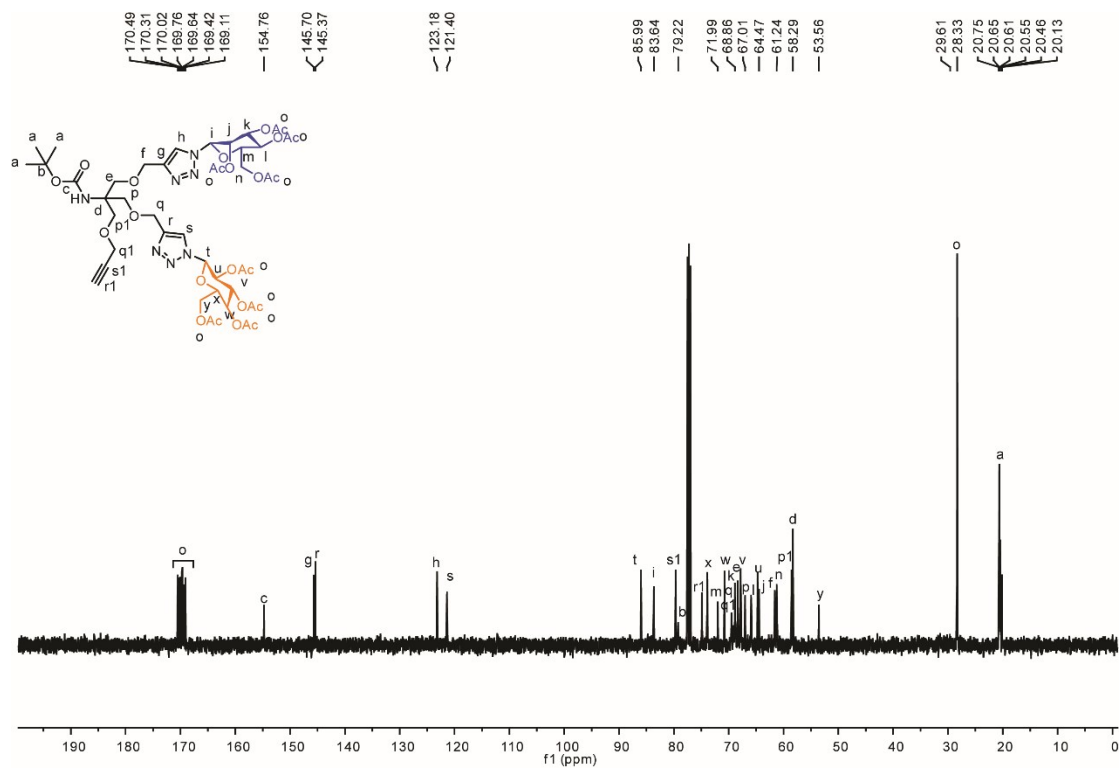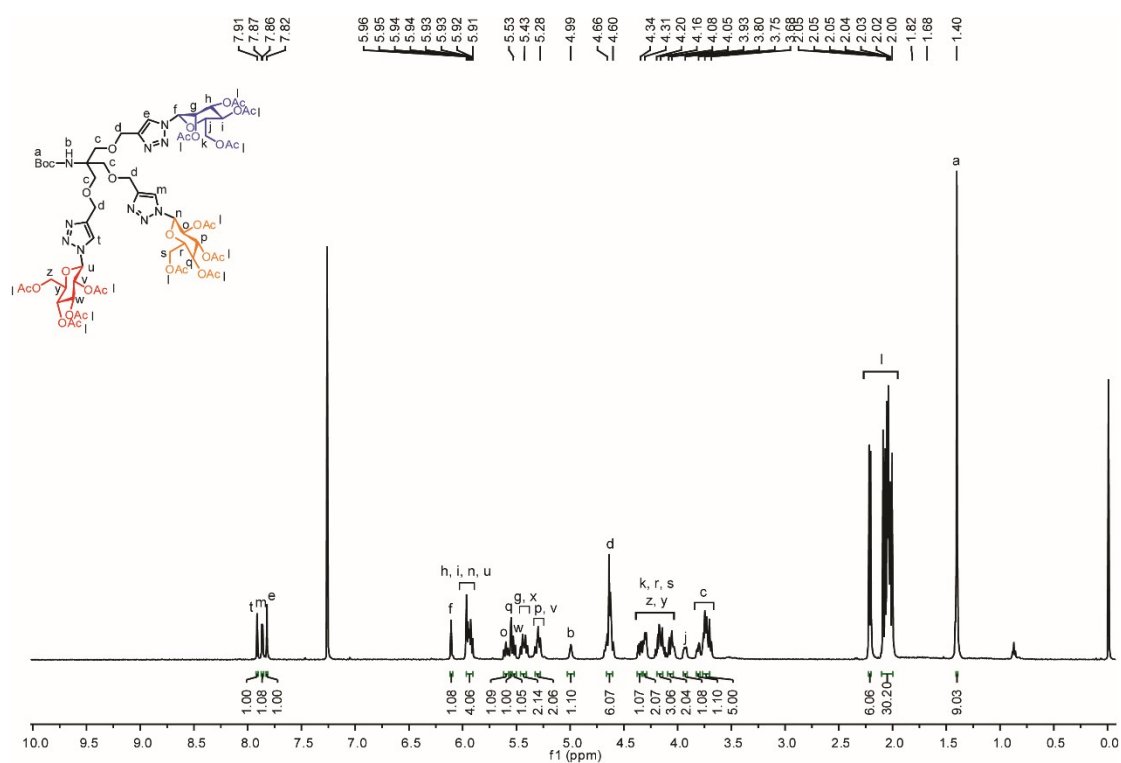

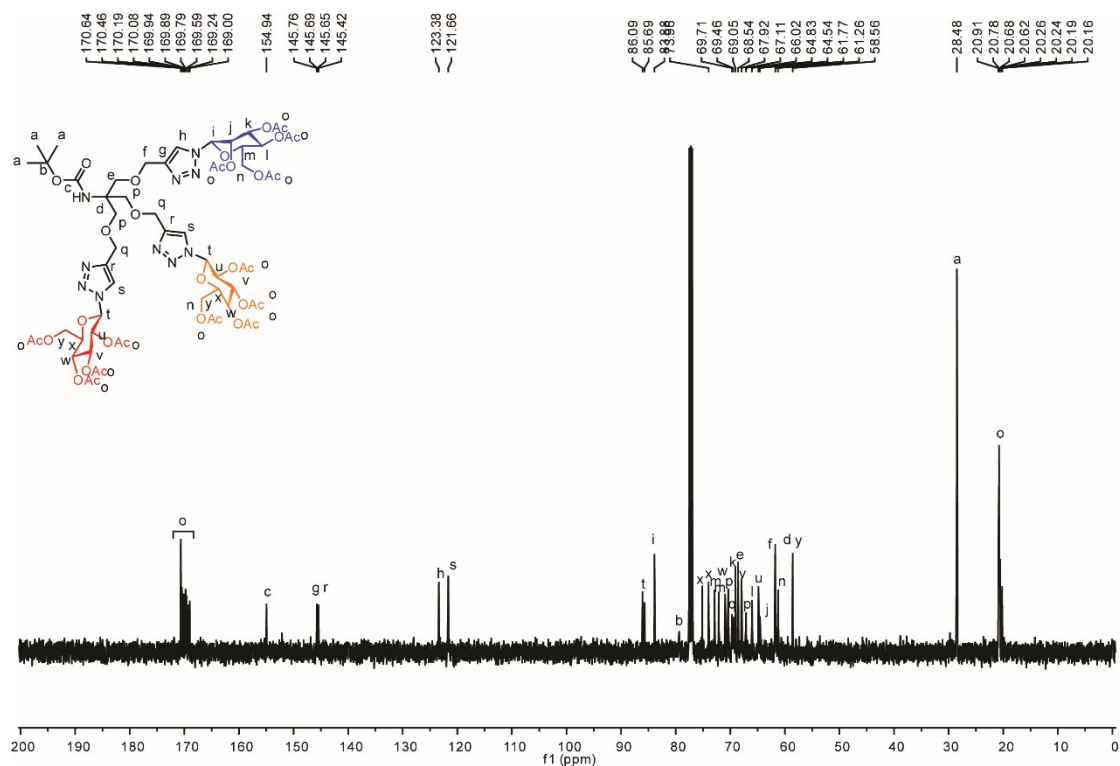

Figure S15.  $^{13}\text{C}$  NMR spectrum of compound **8** in  $\text{CDCl}_3$

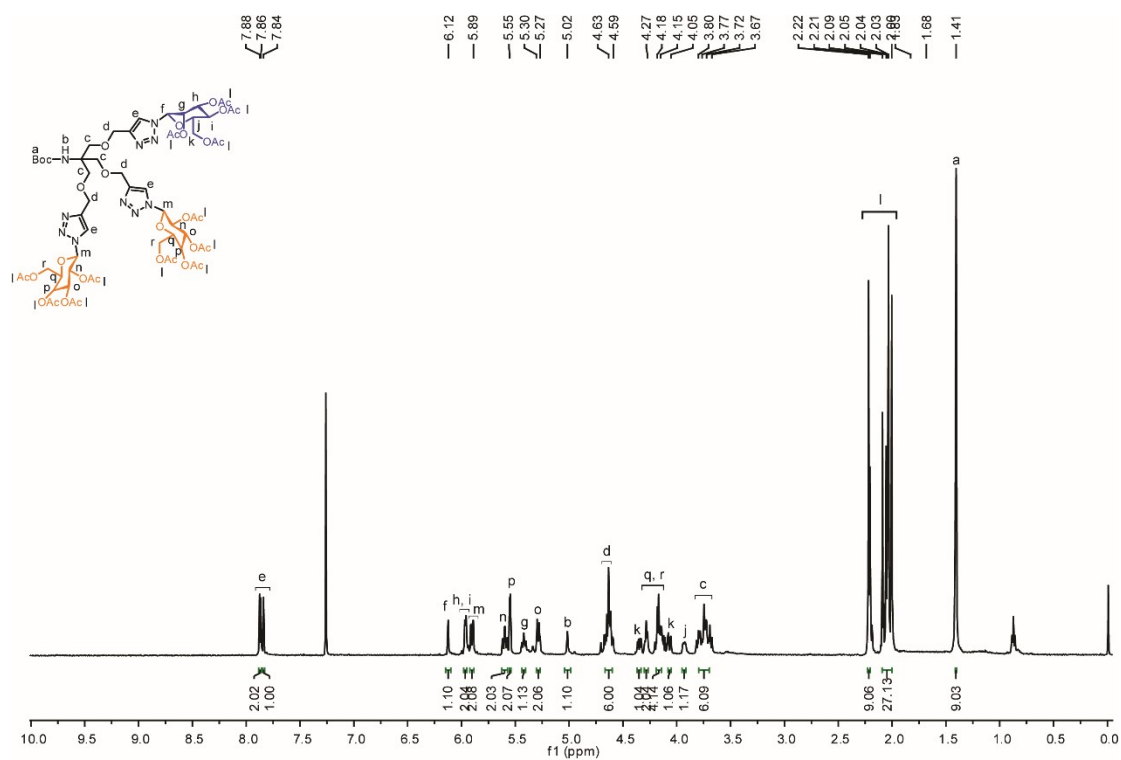

Figure S16.  $^1\text{H}$  NMR spectrum of Compound **9** in  $\text{CDCl}_3$

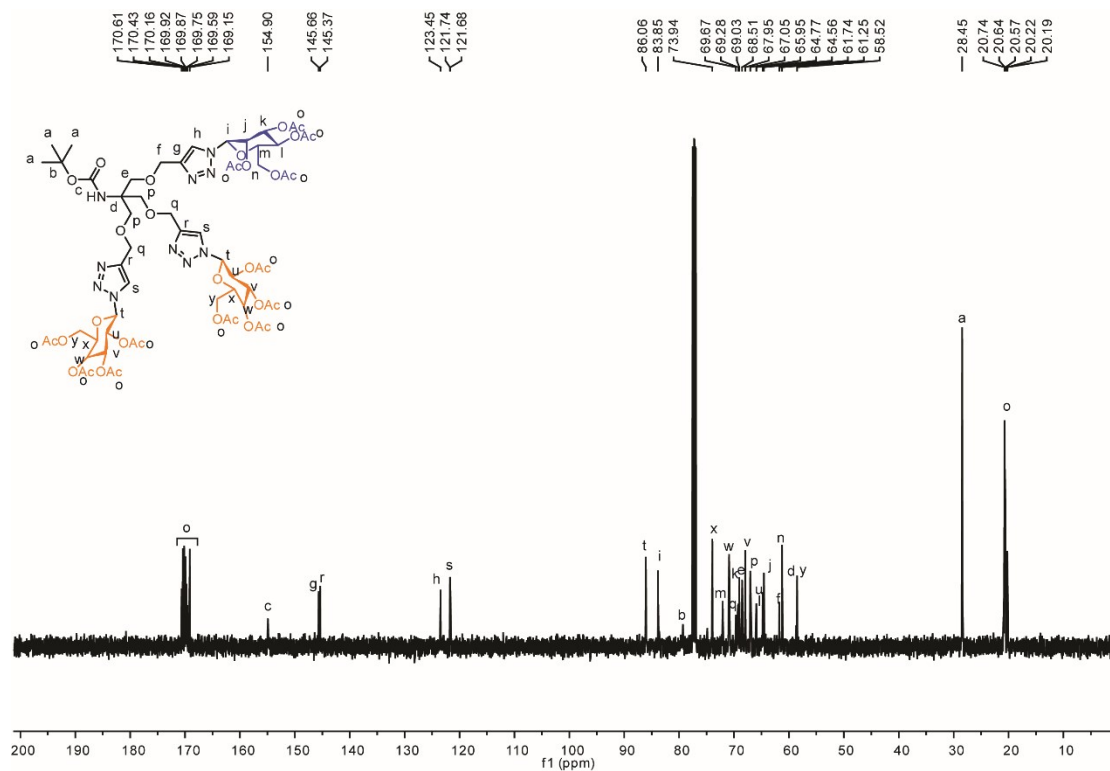

Figure S17.  $^{13}\text{C}$  NMR spectrum of compound **9** in  $\text{CDCl}_3$

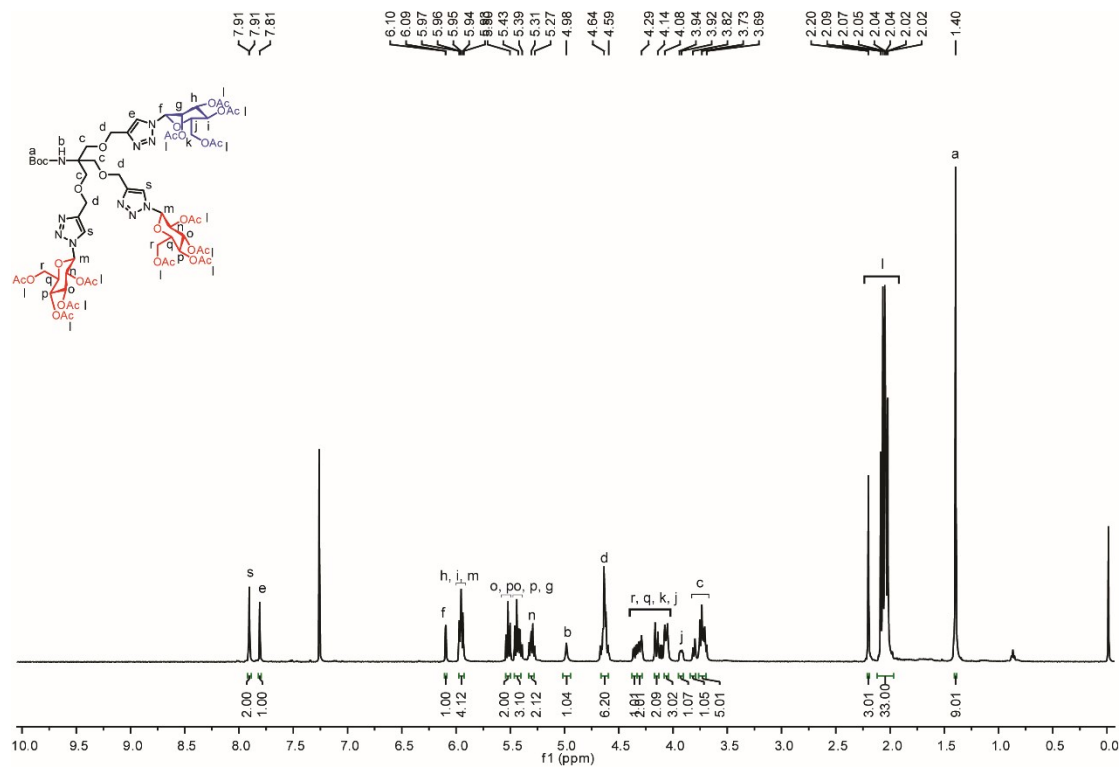

Figure S18.  $^1\text{H}$  NMR spectrum of Compound **10** in  $\text{CDCl}_3$

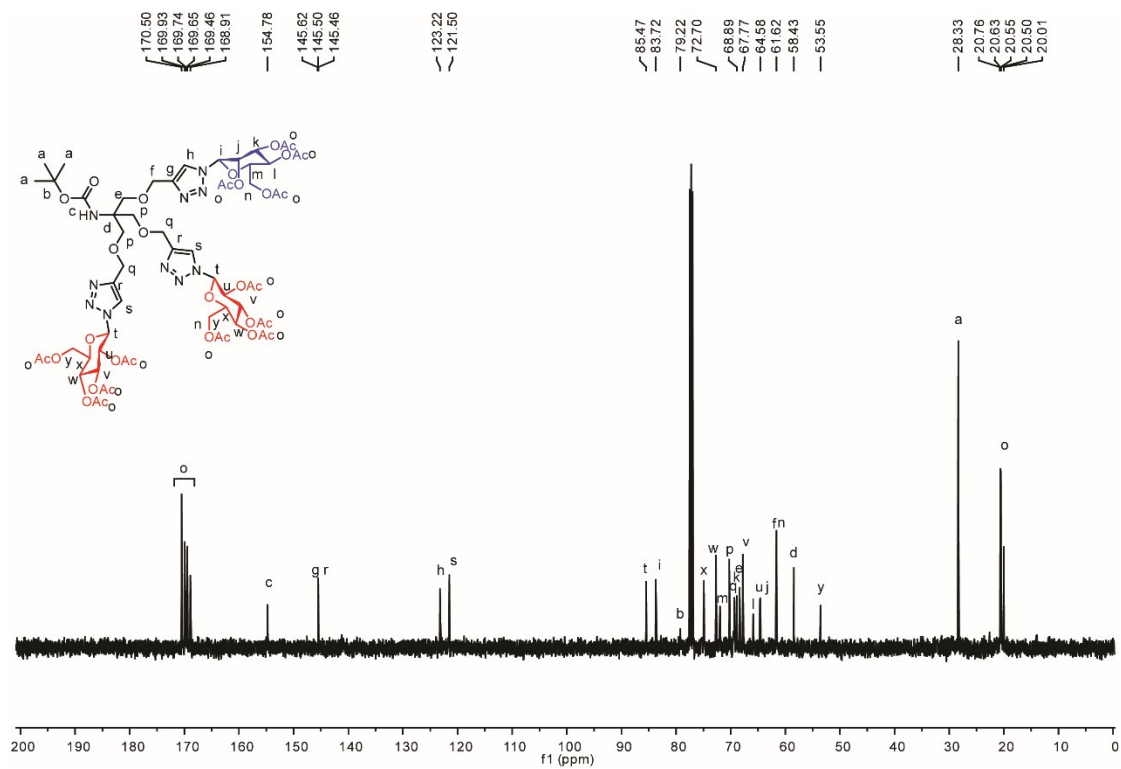

Figure S19.  $^{13}\text{C}$  NMR spectrum of compound **10** in  $\text{CDCl}_3$

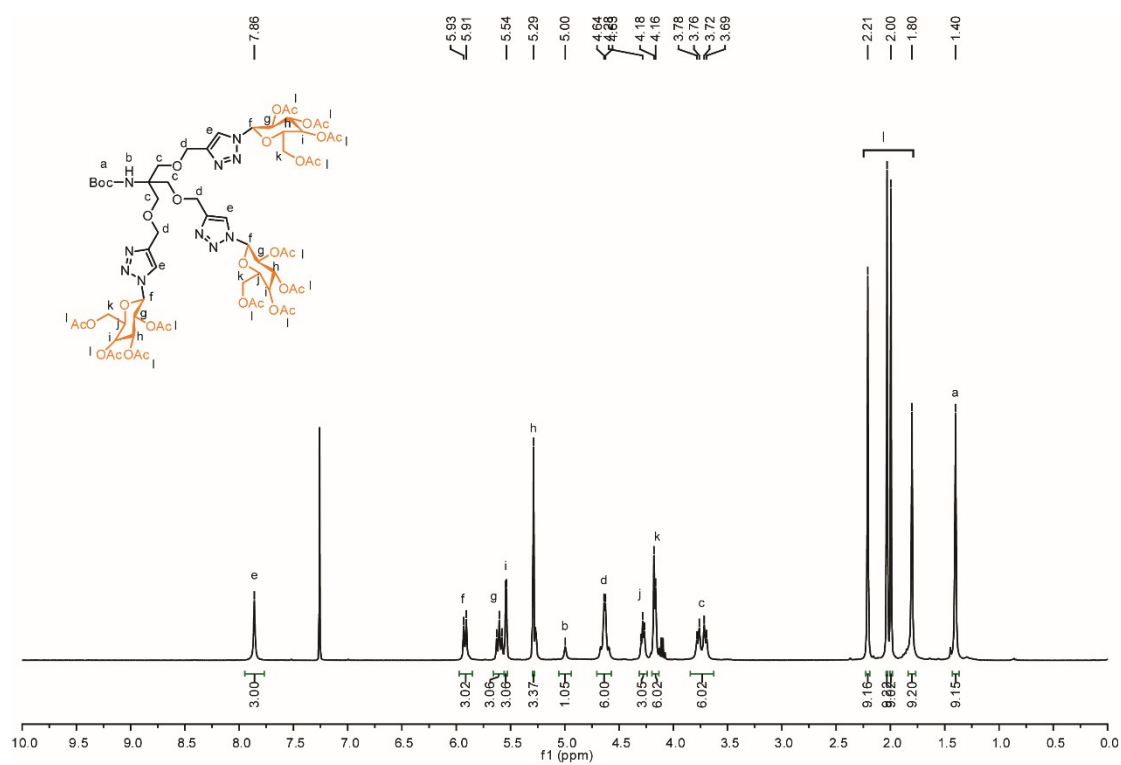

Figure S20.  $^1\text{H}$  NMR spectrum of Compound **11** in  $\text{CDCl}_3$

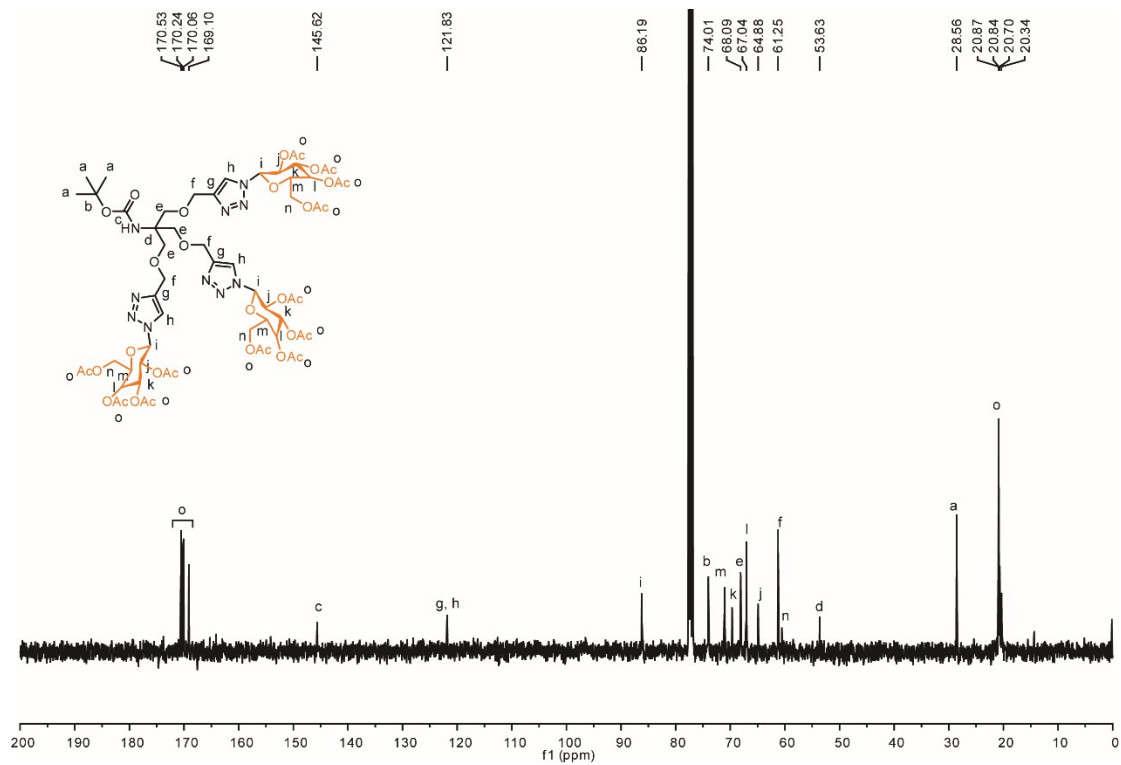

Figure S21. <sup>13</sup>C NMR spectrum of compound 11 in CDCl<sub>3</sub>

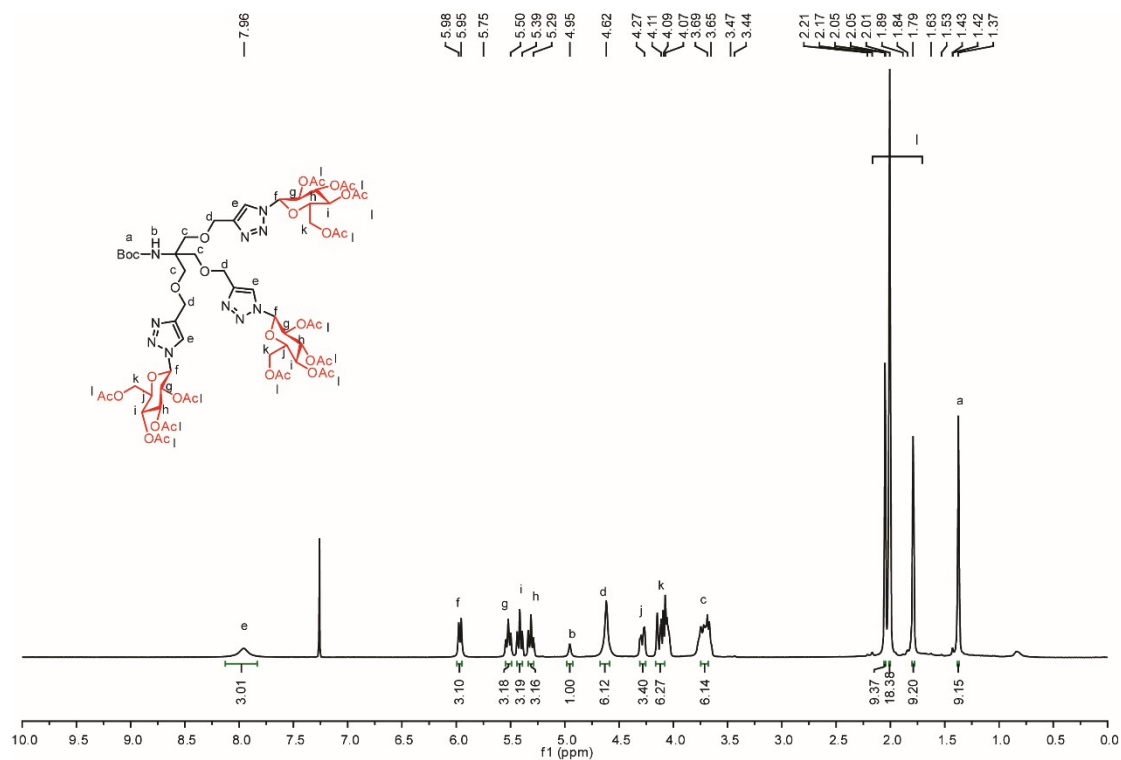

Figure S22. <sup>1</sup>H NMR spectrum of Compound 12 in CDCl<sub>3</sub>

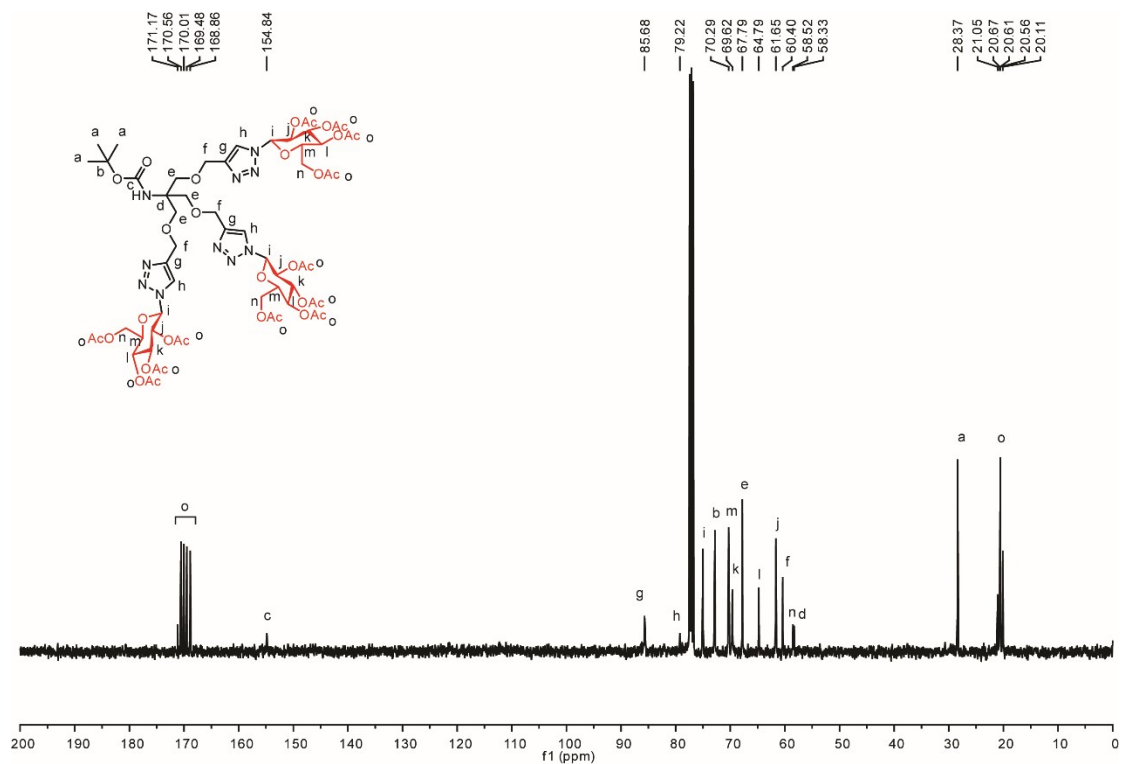

Figure S23.  $^{13}\text{C}$  NMR spectrum of compound **12** in  $\text{CDCl}_3$

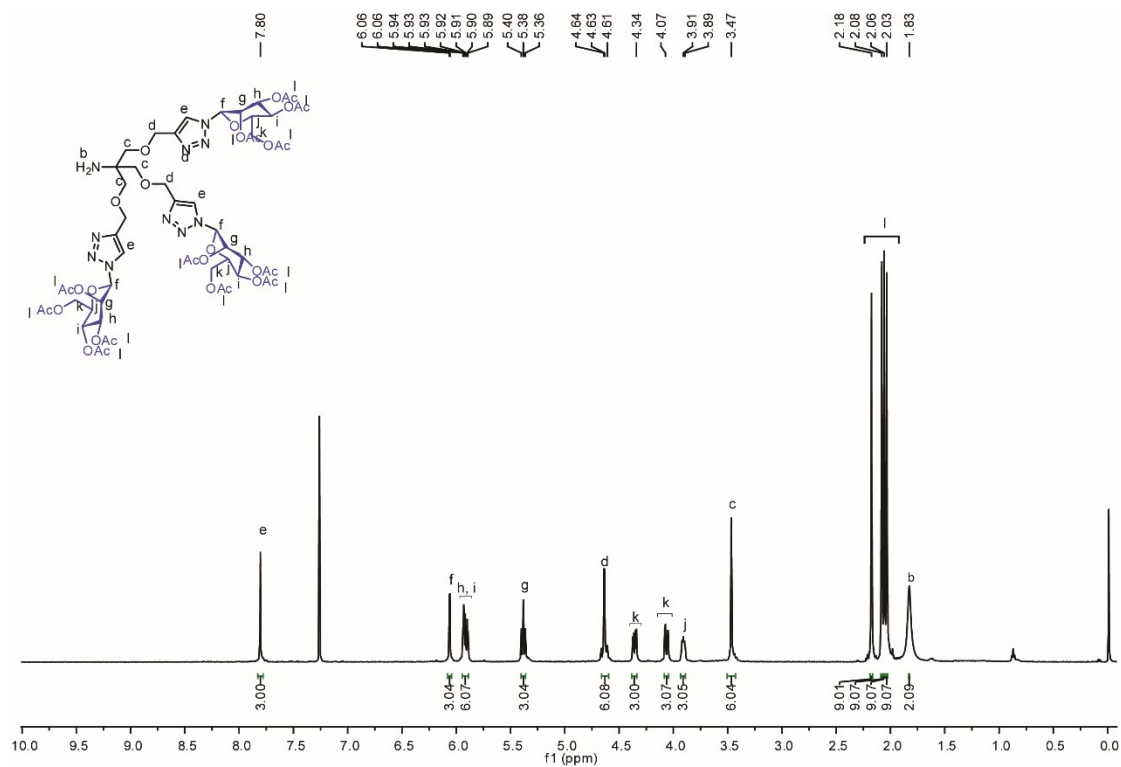

Figure S24.  $^1\text{H}$  NMR spectrum of Compound **13** in  $\text{CDCl}_3$



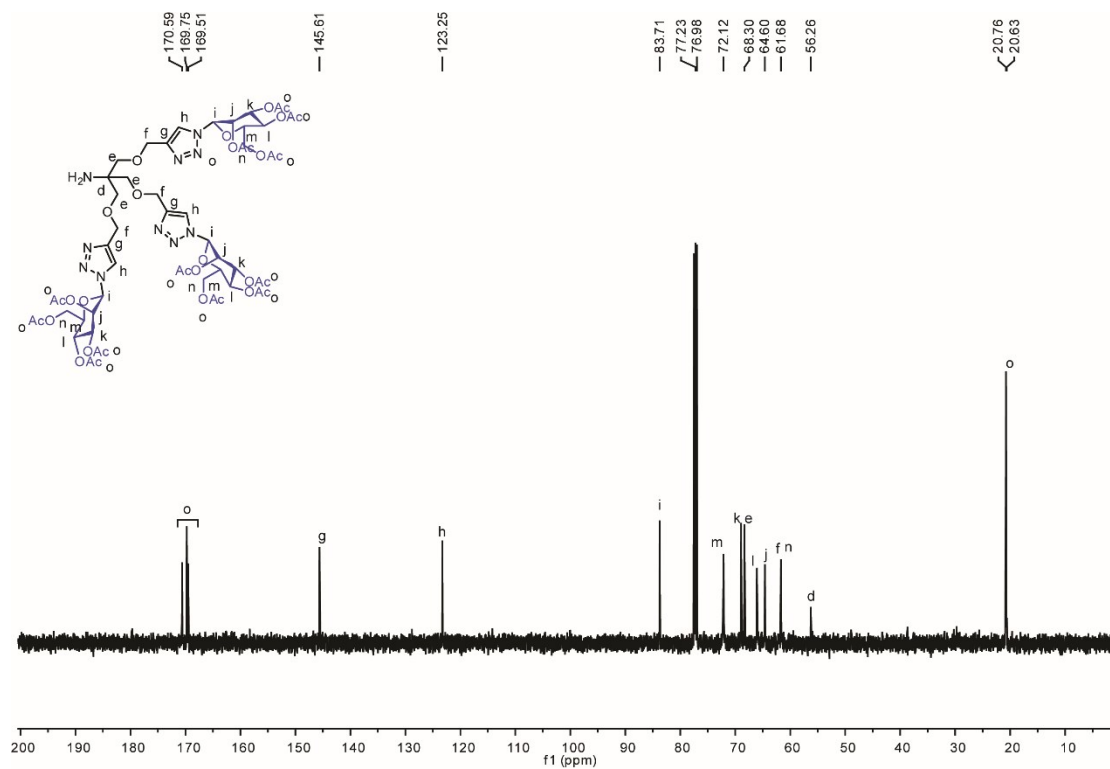

Figure S25.  $^{13}\text{C}$  NMR spectrum of compound 13 in  $\text{CDCl}_3$

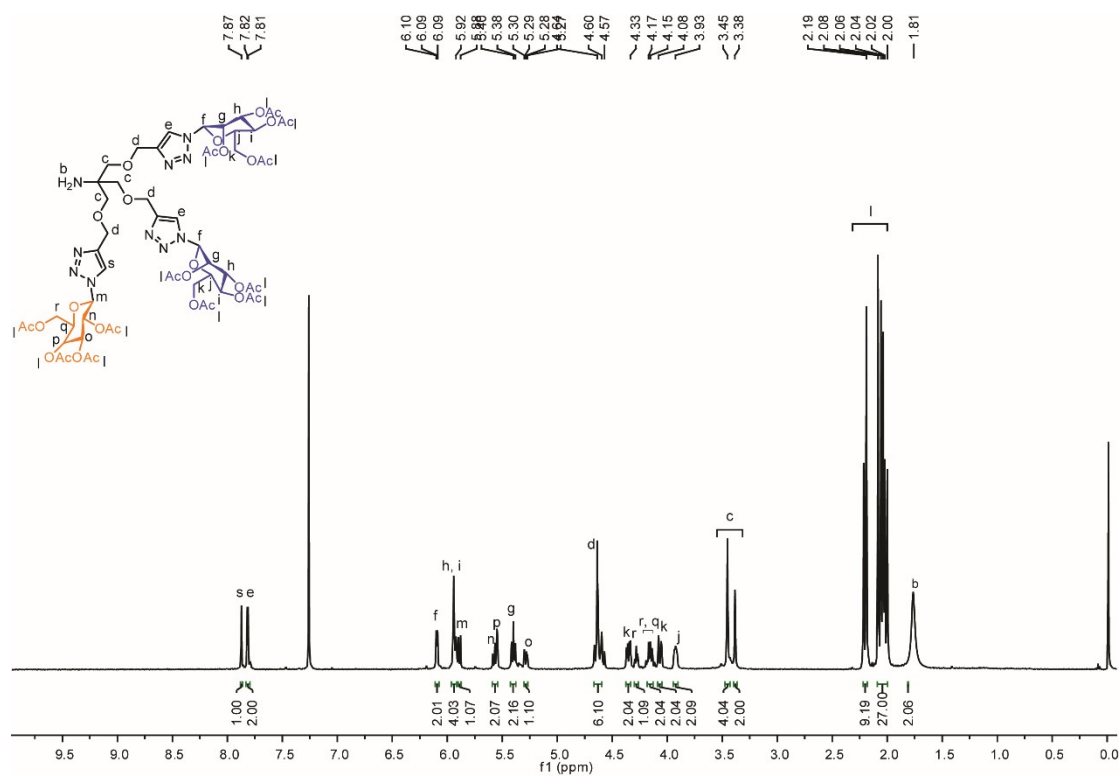

Figure S26.  $^1\text{H}$  NMR spectrum of Compound 14 in  $\text{CDCl}_3$

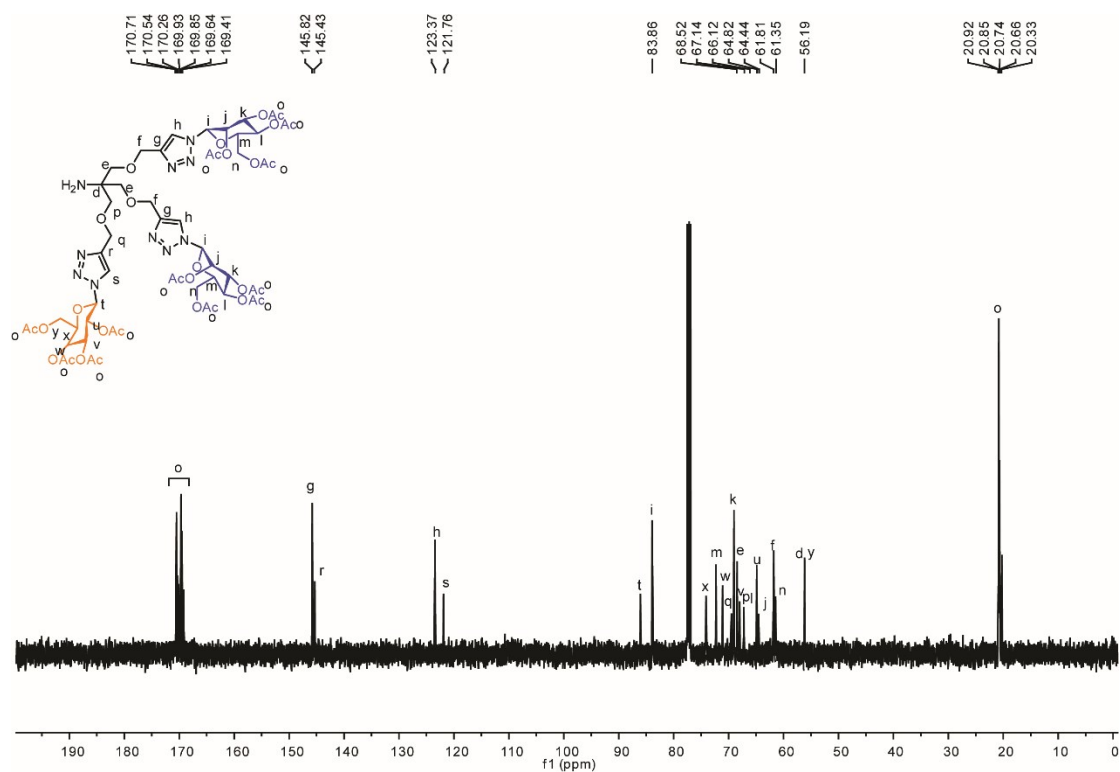

Figure S27.  $^{13}\text{C}$  NMR spectrum of compound **14** in  $\text{CDCl}_3$

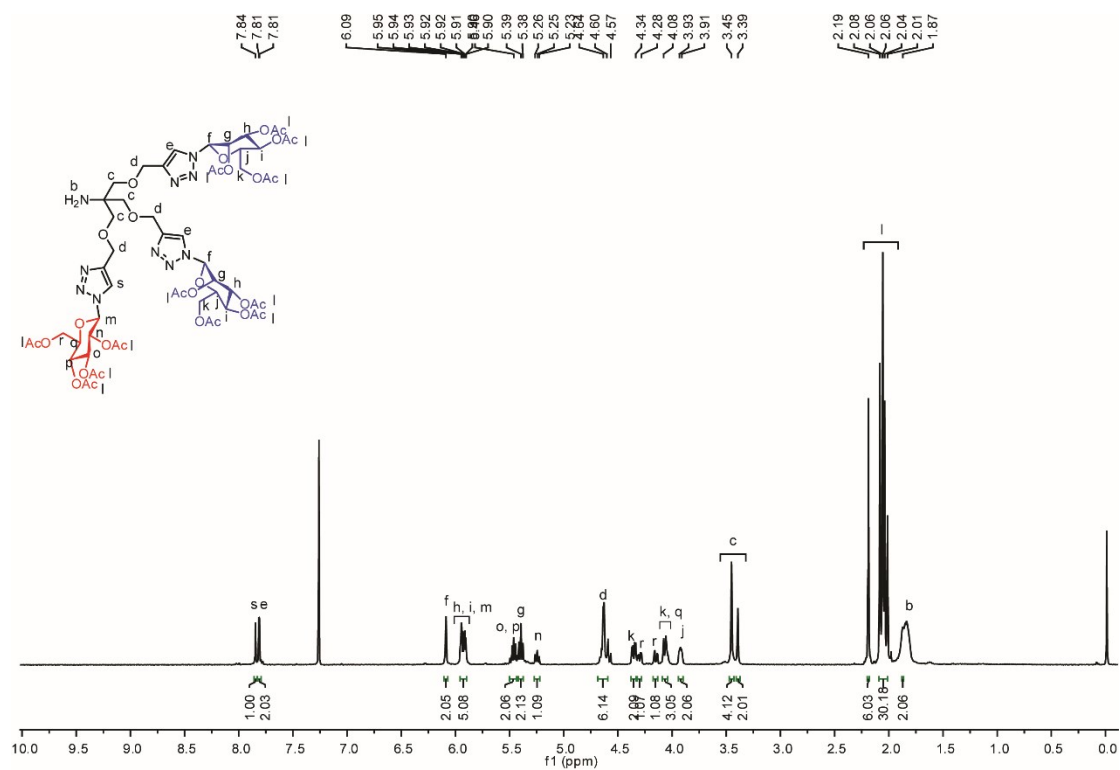

Figure S28.  $^1\text{H}$  NMR spectrum of Compound **15** in  $\text{CDCl}_3$

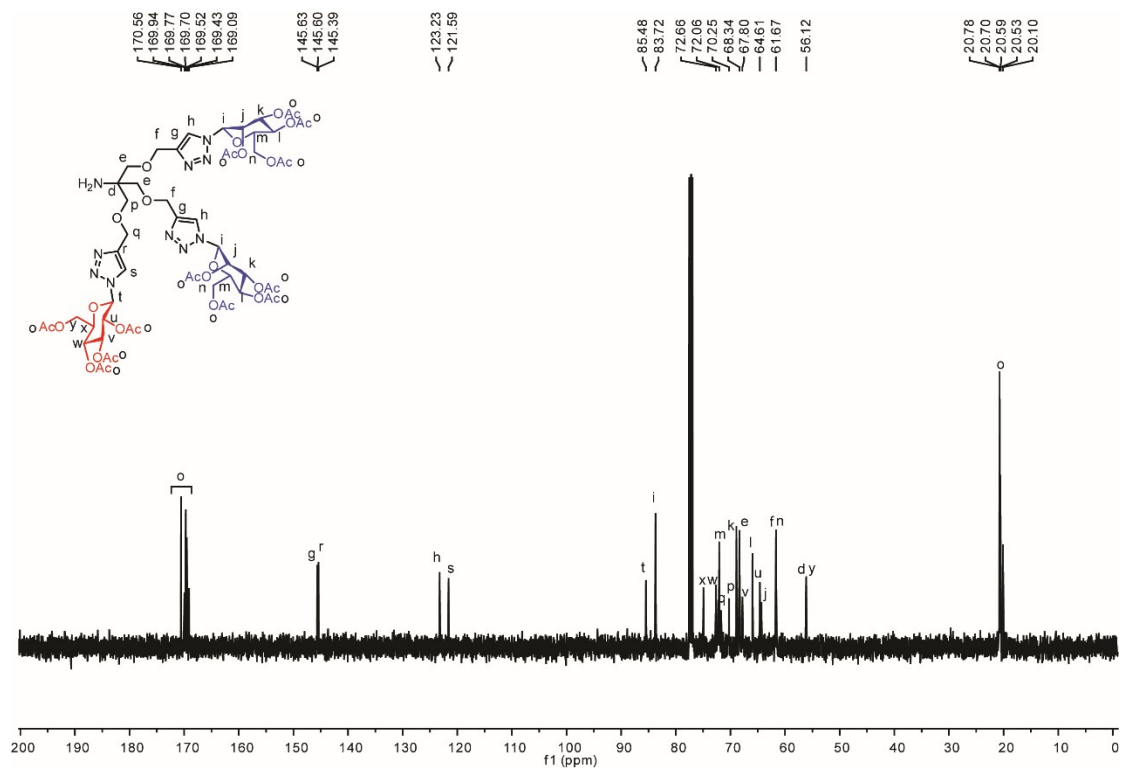

Figure S29. <sup>13</sup>C NMR spectrum of compound 15 in CDCl<sub>3</sub>

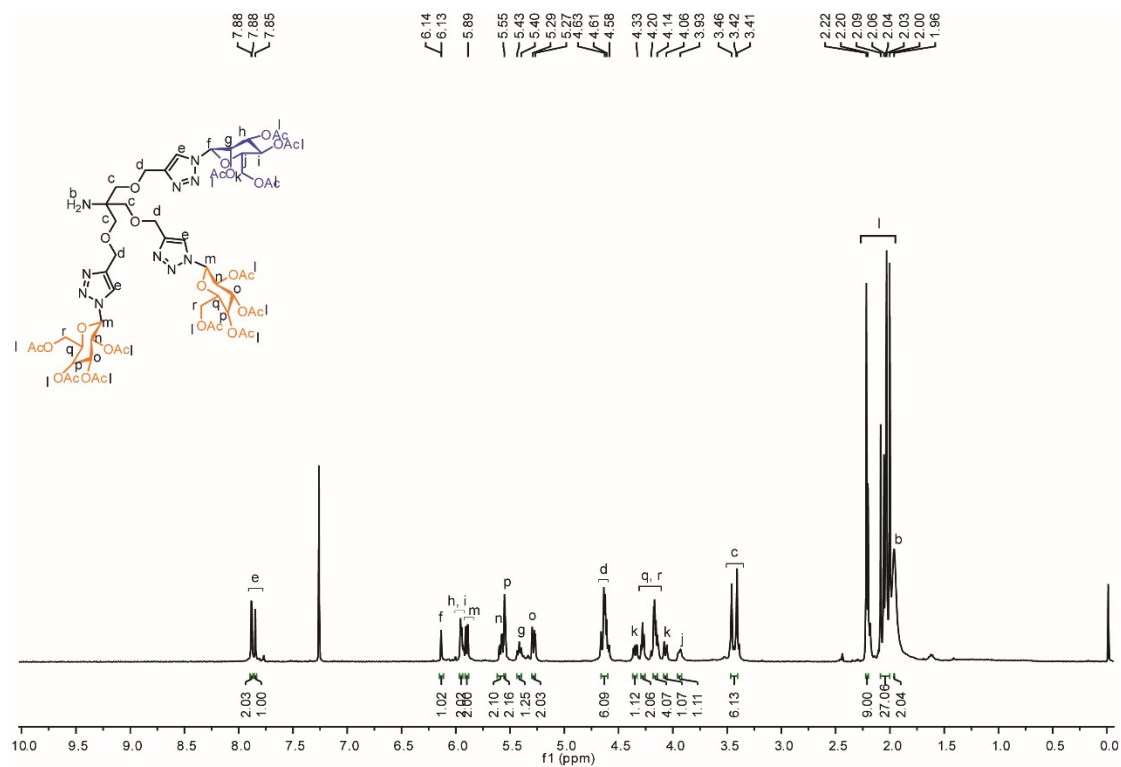

Figure S30. <sup>1</sup>H NMR spectrum of Compound 16 in CDCl<sub>3</sub>

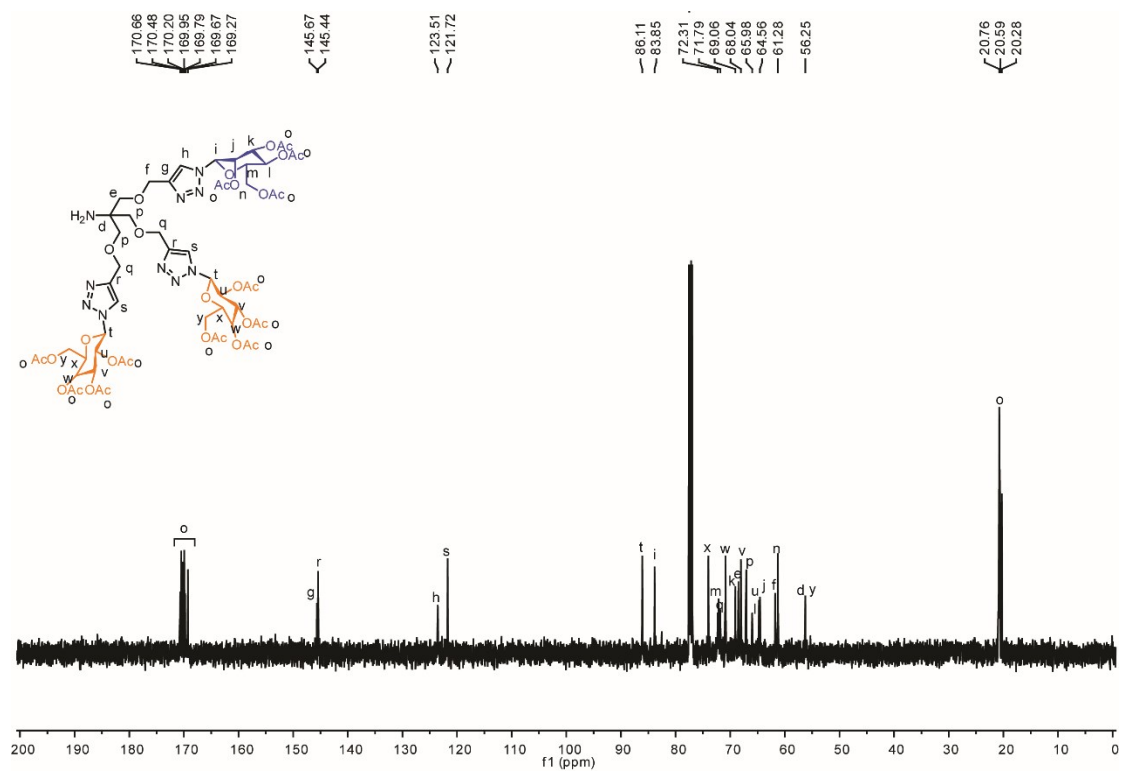

Figure S31.  $^{13}\text{C}$  NMR spectrum of compound 16 in  $\text{CDCl}_3$

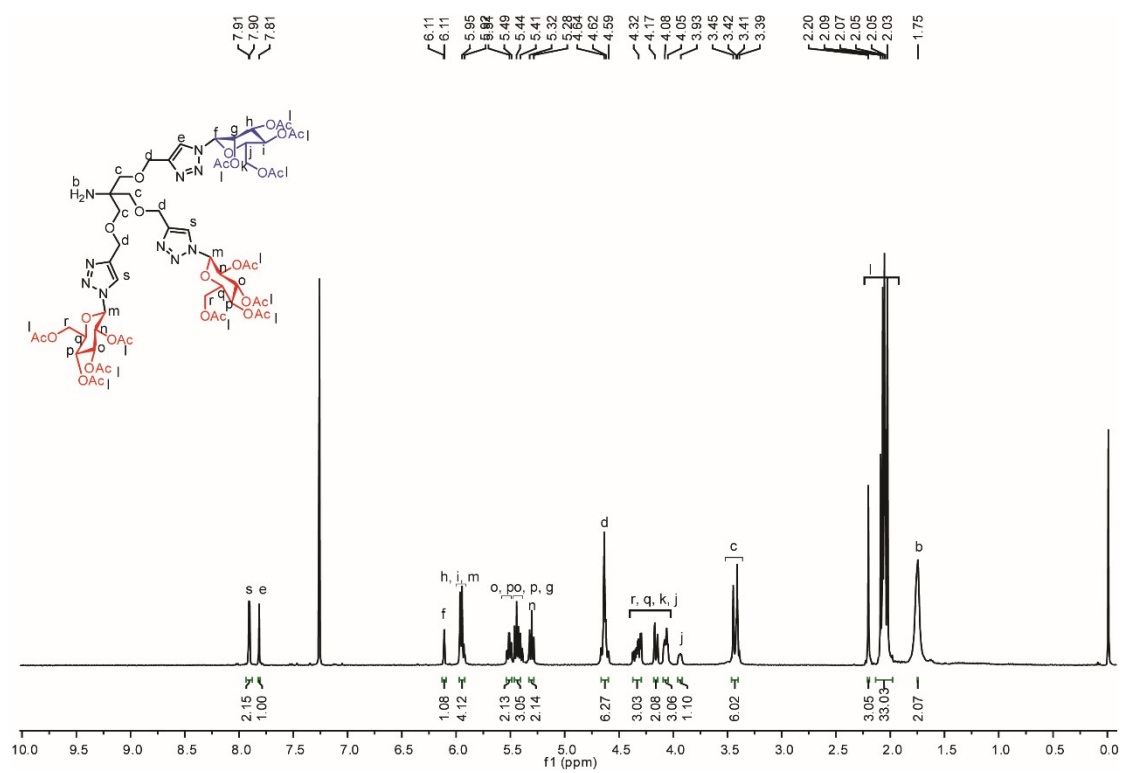

Figure S32.  $^1\text{H}$  NMR spectrum of compound 17 in  $\text{CDCl}_3$

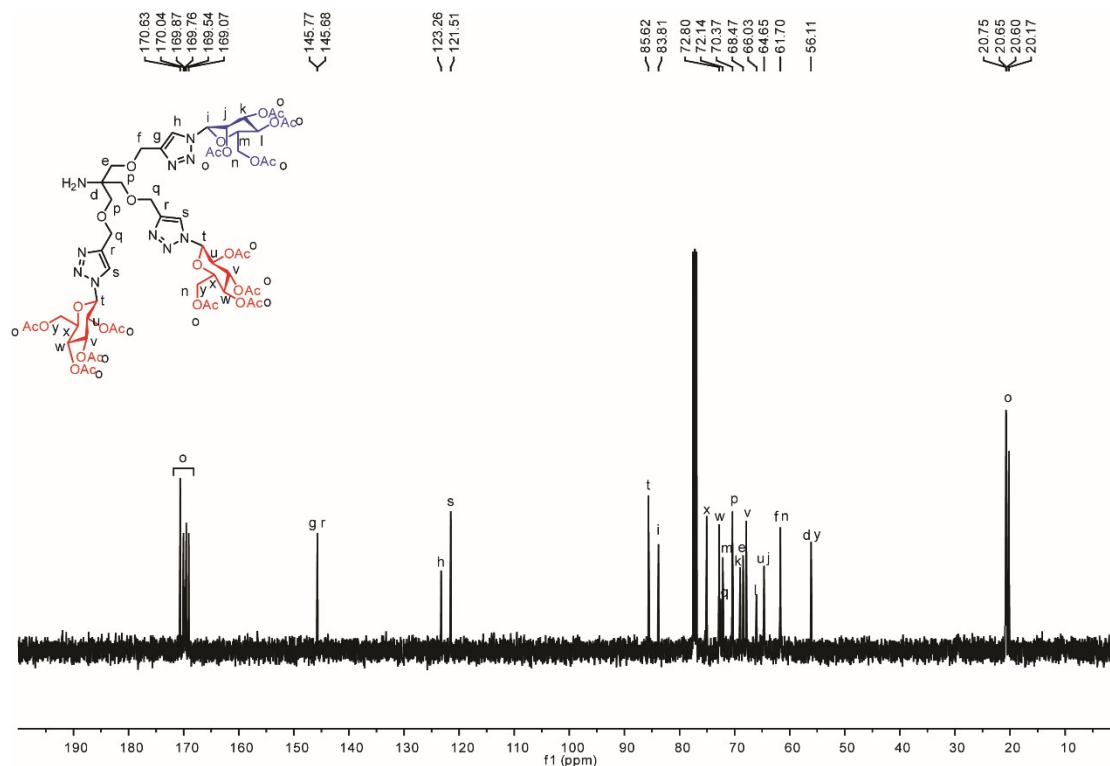

Figure S33.  $^{13}\text{C}$  NMR spectrum of compound **17** in  $\text{CDCl}_3$

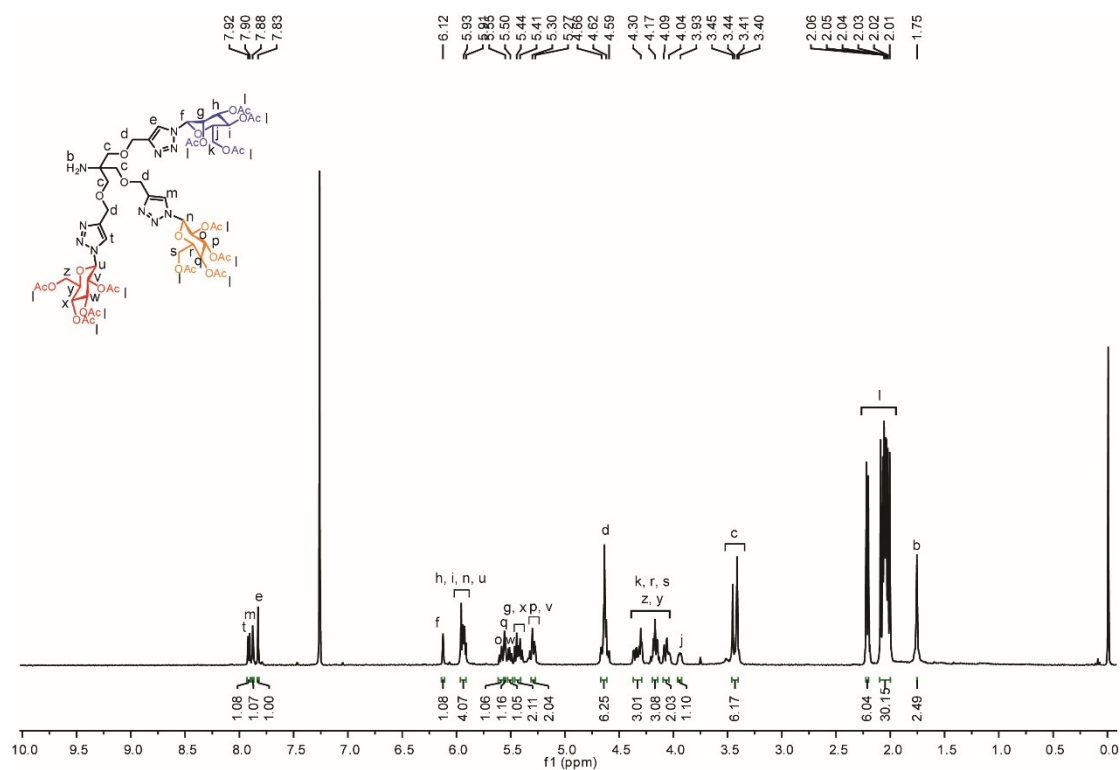

Figure S34.  $^1\text{H}$  NMR spectrum of compound **18** in  $\text{CDCl}_3$

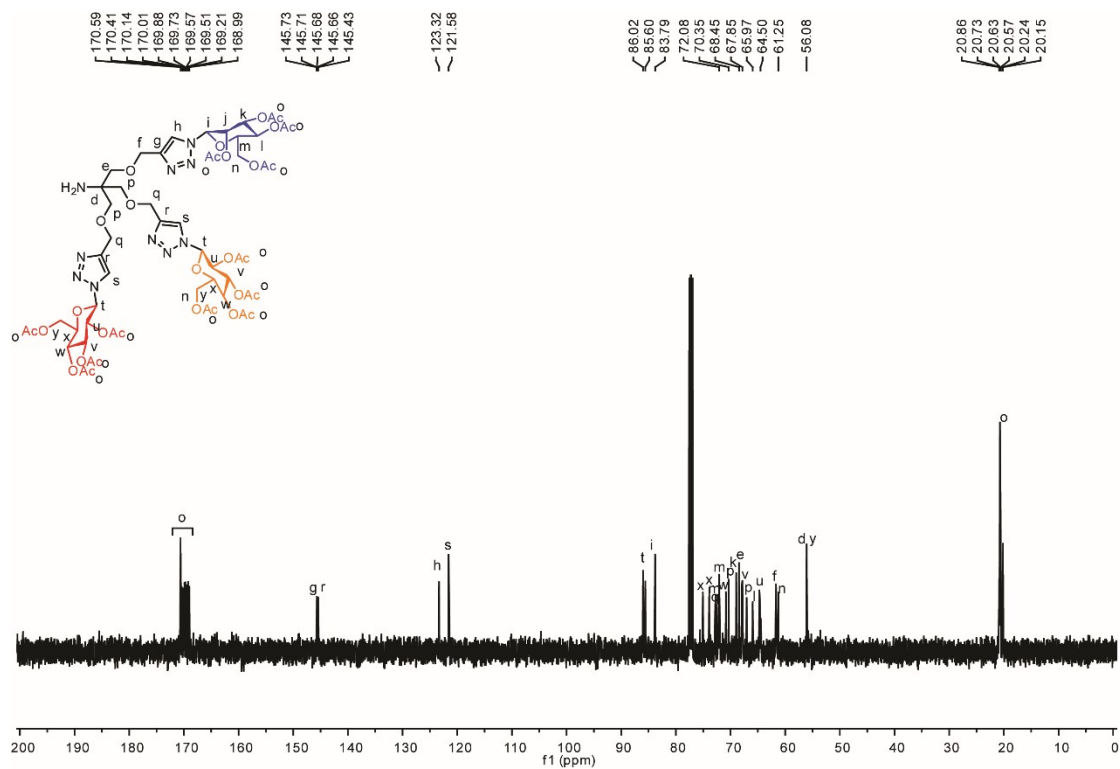

Figure S35.  $^{13}\text{C}$  NMR spectrum of compound 18 in  $\text{CDCl}_3$

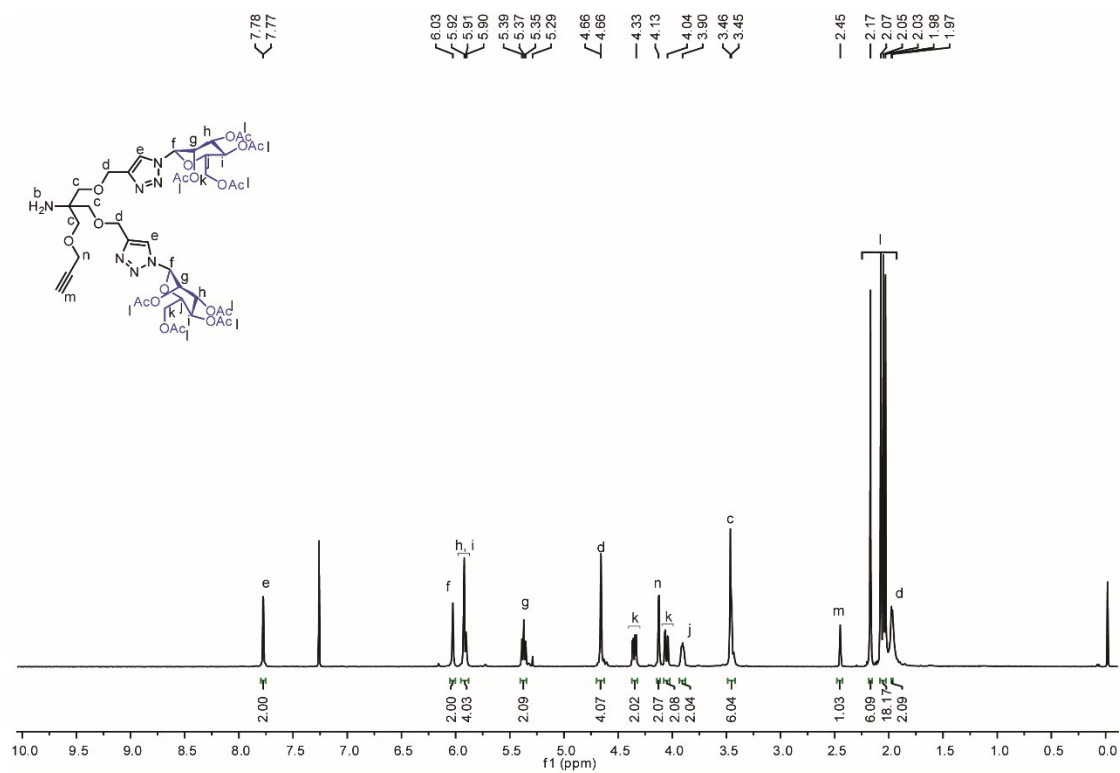

Figure S36.  $^1\text{H}$  NMR spectrum of compound 19 in  $\text{CDCl}_3$

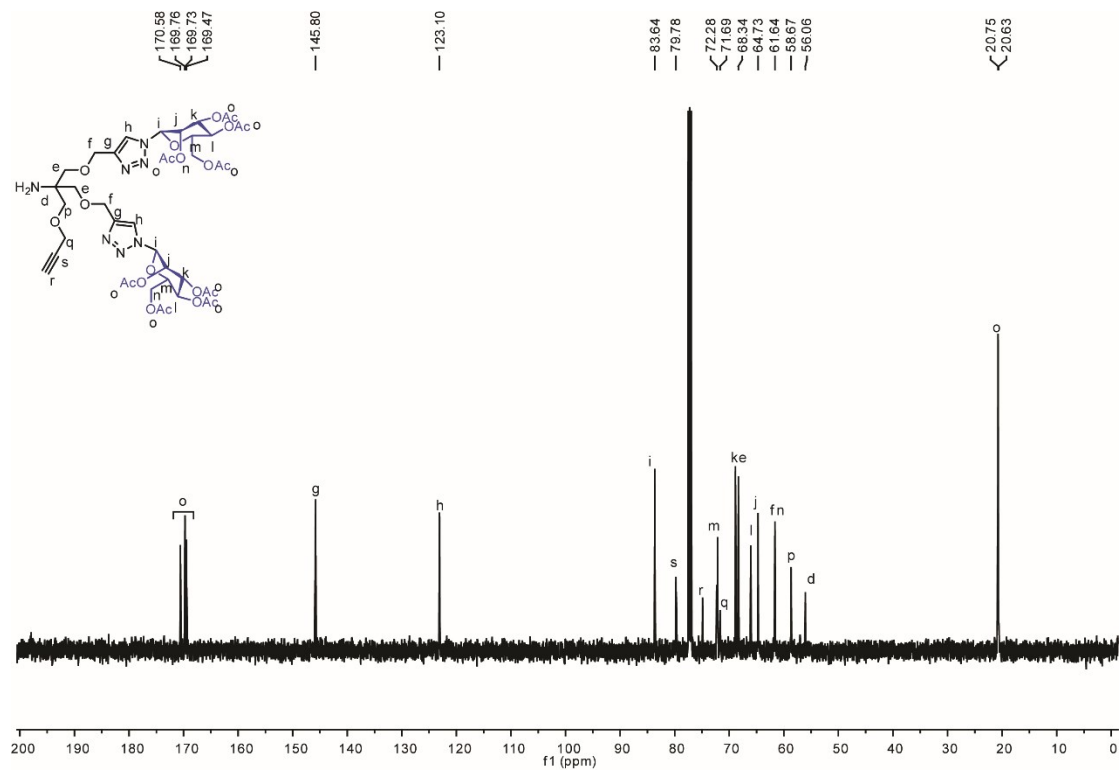

Figure S37.  $^{13}\text{C}$  NMR spectrum of compound **19** in  $\text{CDCl}_3$

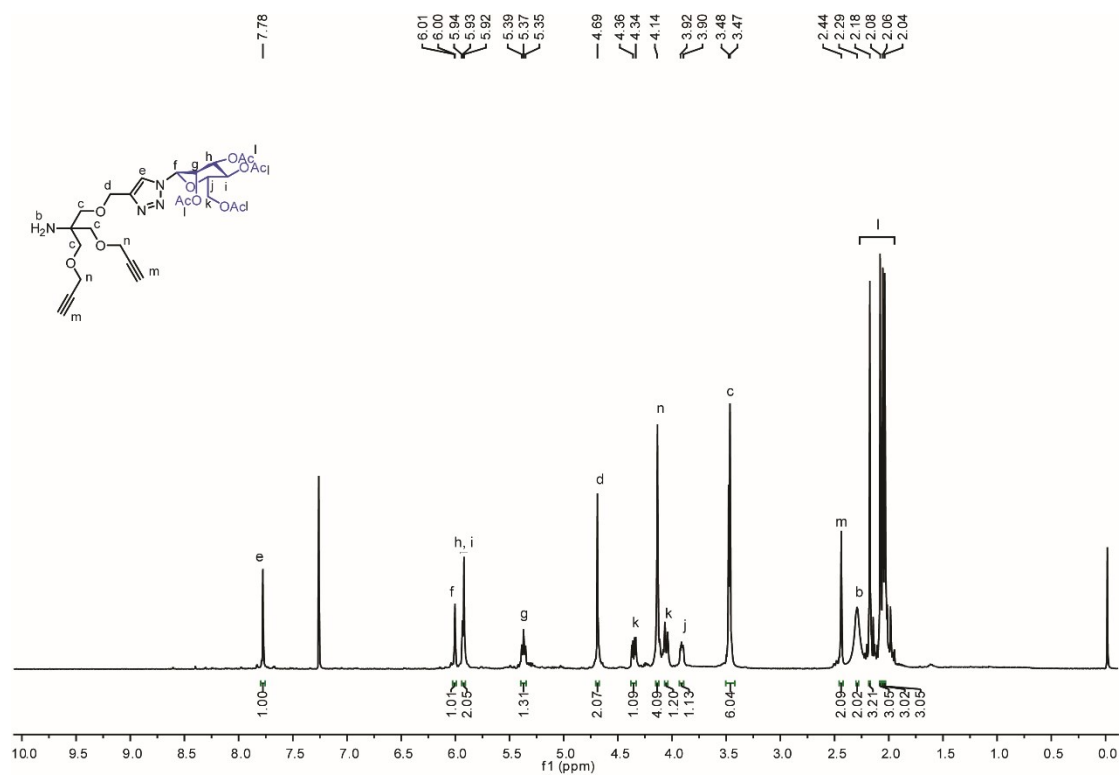

Figure S38.  $^1\text{H}$  NMR spectrum of compound **20** in  $\text{CDCl}_3$

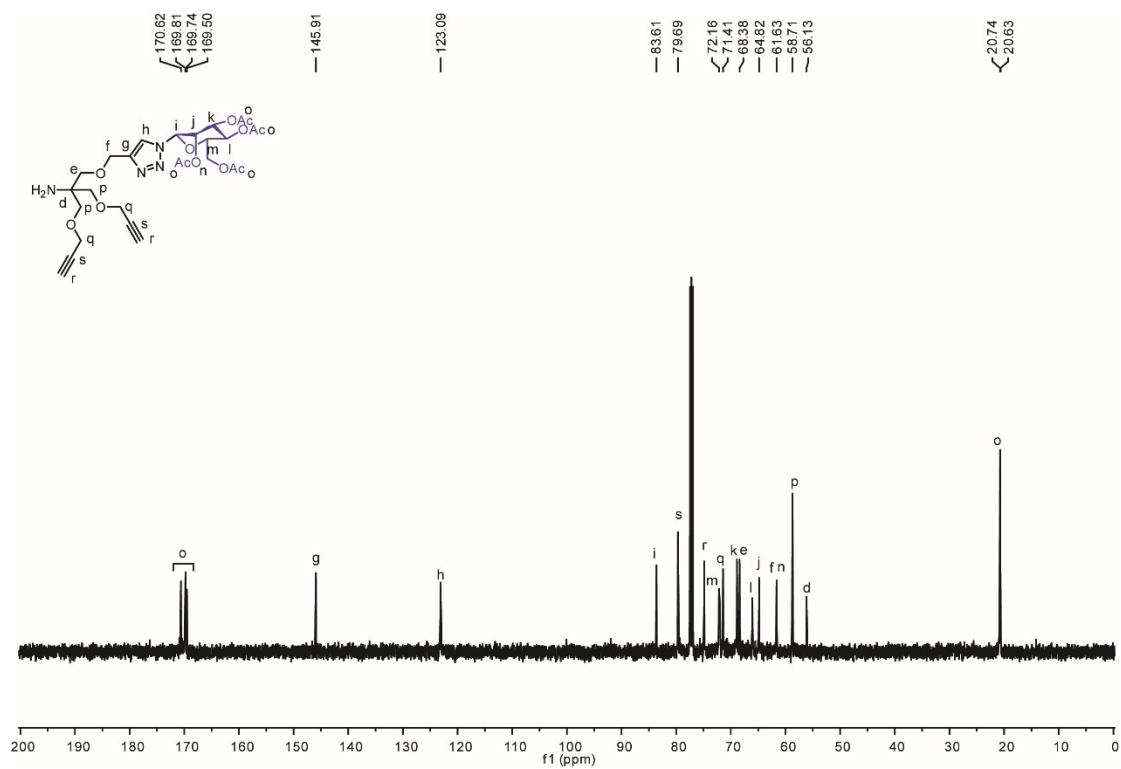

Figure S39.  $^{13}\text{C}$  NMR spectrum of compound **20** in  $\text{CDCl}_3$

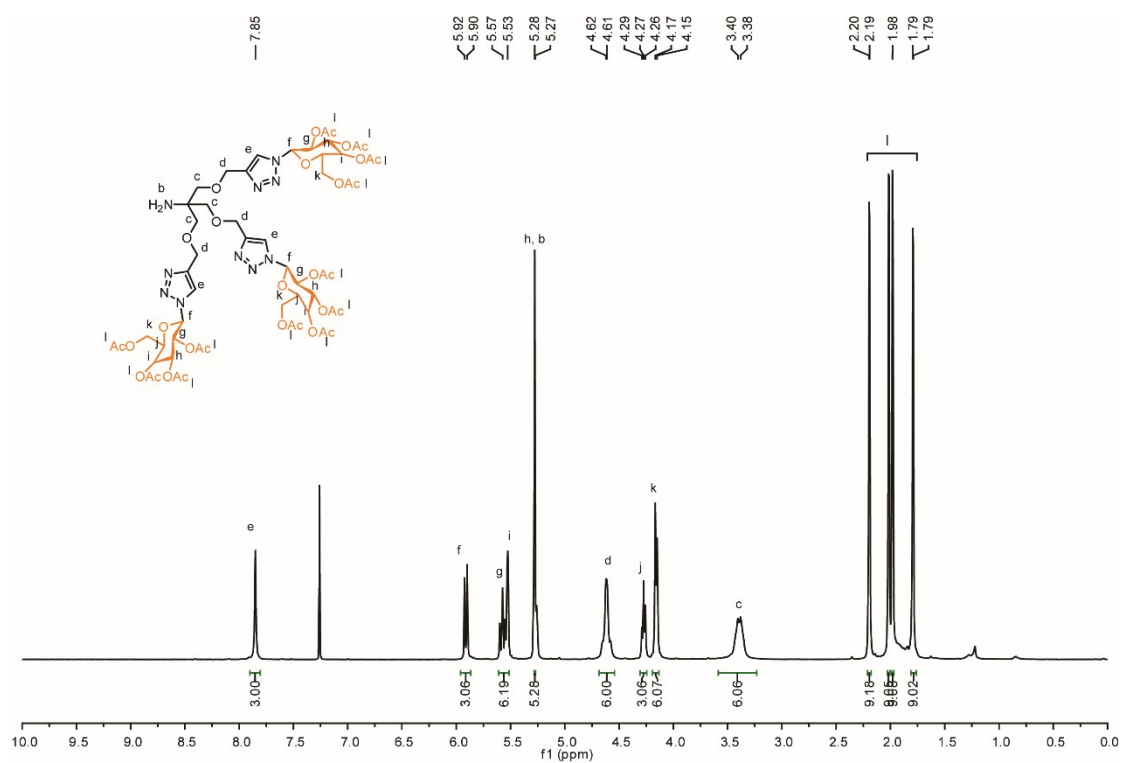

Figure S40.  $^1\text{H}$  NMR spectrum of compound **21** in  $\text{CDCl}_3$



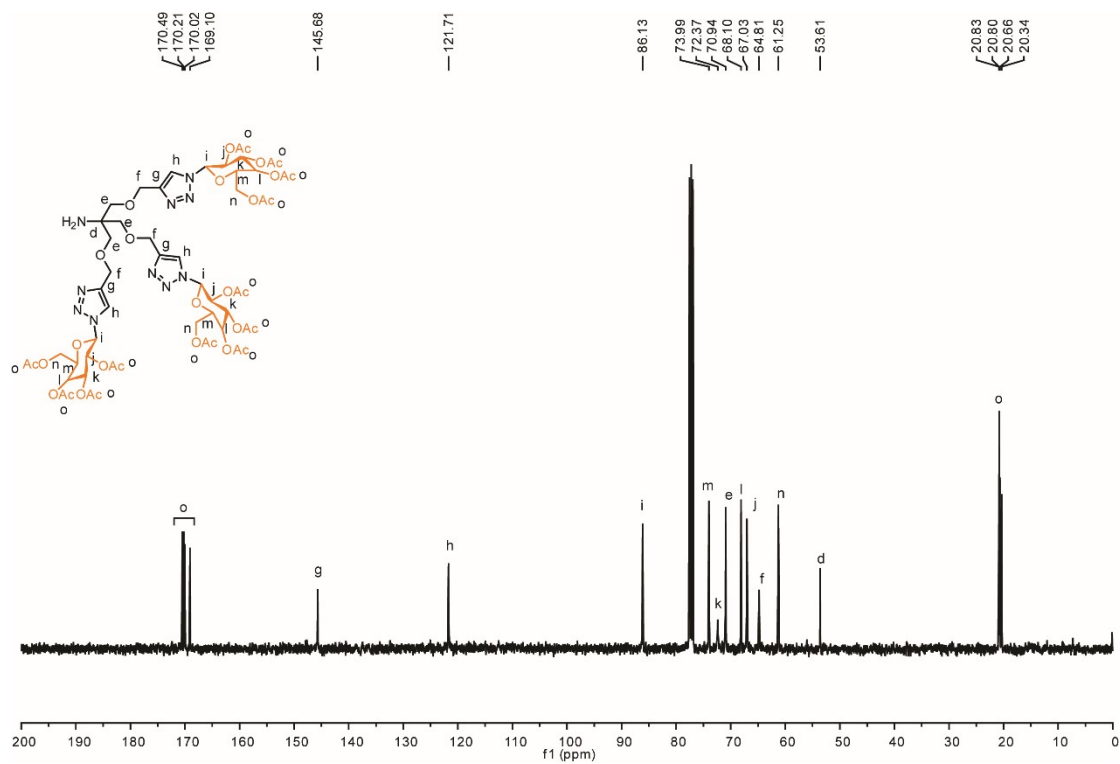

Figure S41.  $^{13}\text{C}$  NMR spectrum of compound 21 in  $\text{CDCl}_3$

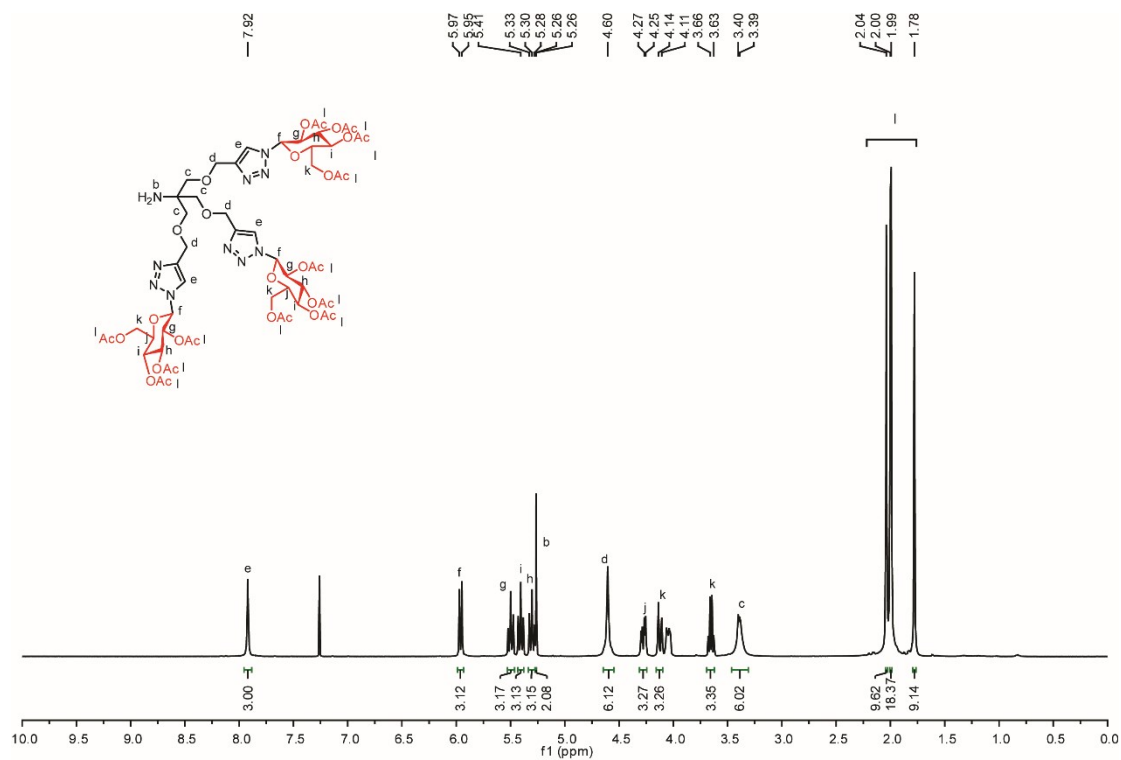

Figure S42.  $^1\text{H}$  NMR spectrum of compound 22 in  $\text{CDCl}_3$

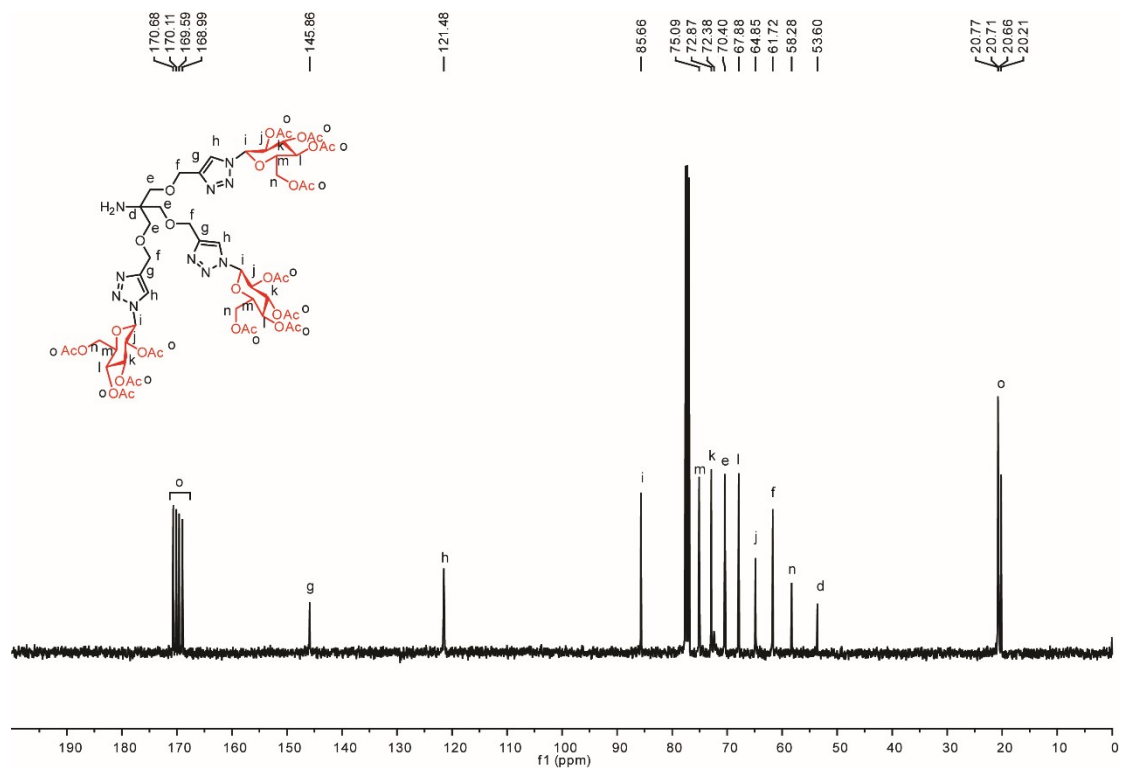

Figure S43.  $^{13}\text{C}$  NMR spectrum of compound **22** in  $\text{CDCl}_3$

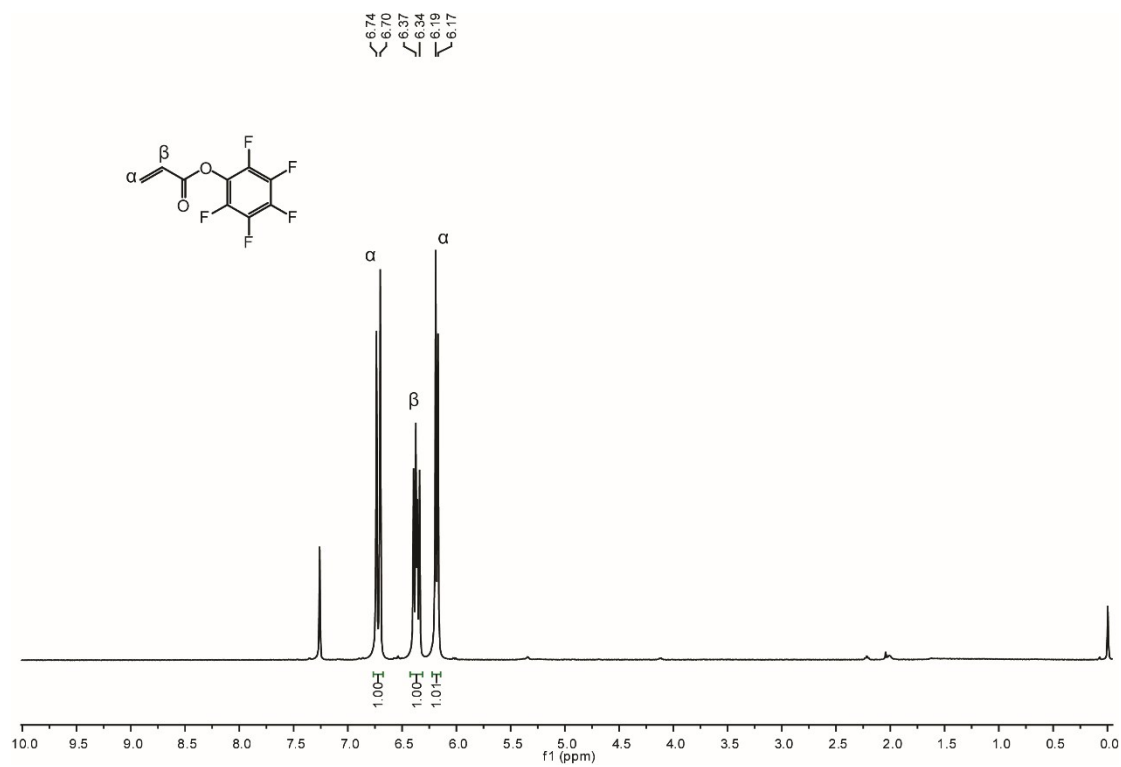

Figure S44.  $^1\text{H}$  NMR spectrum of **PFPA** in  $\text{CDCl}_3$

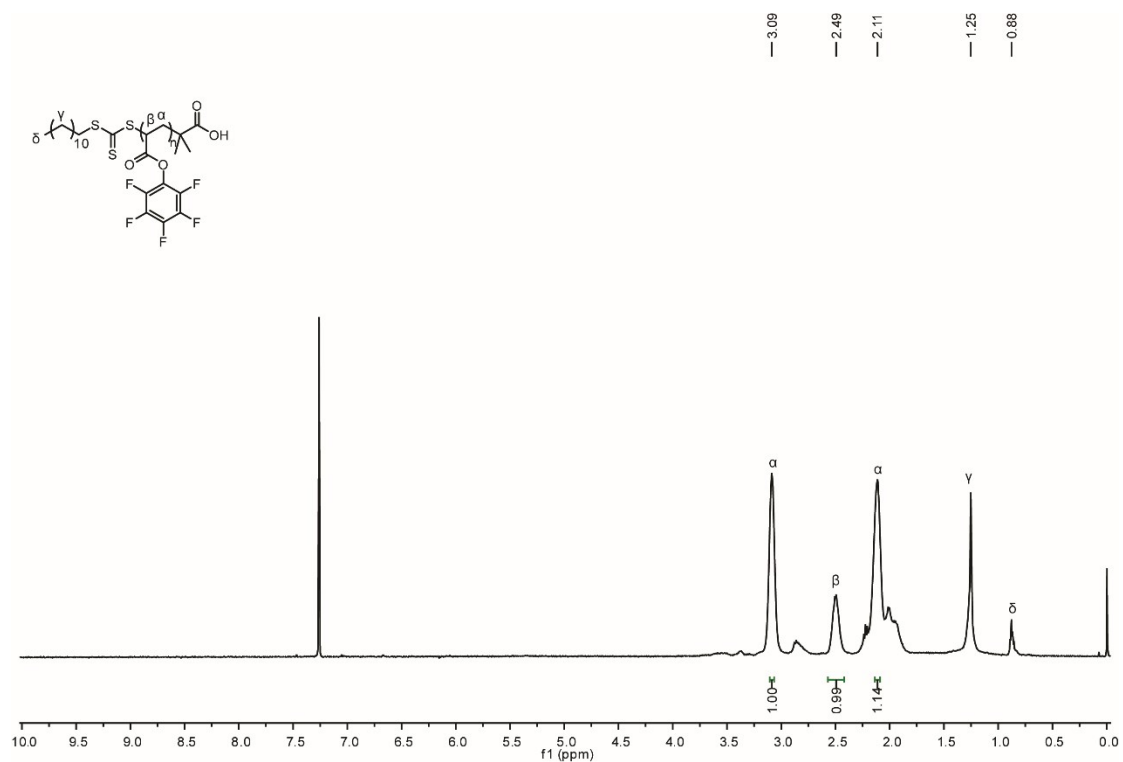

Figure S45.  $^1\text{H}$  NMR spectrum of pPFPA in  $\text{CDCl}_3$

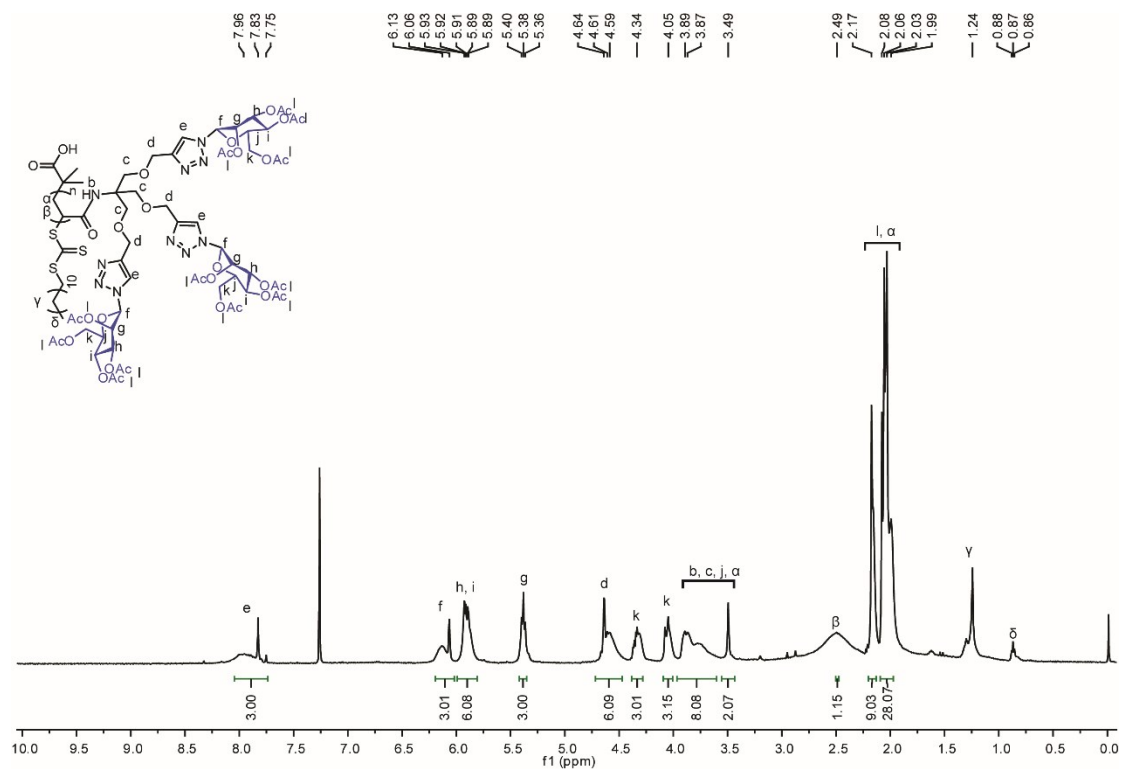

Figure S46.  $^1\text{H}$  NMR spectrum of  $\text{P}(\alpha\text{Man}-\alpha\text{Man}-\alpha\text{Man}-\text{OAc})$  in  $\text{CDCl}_3$

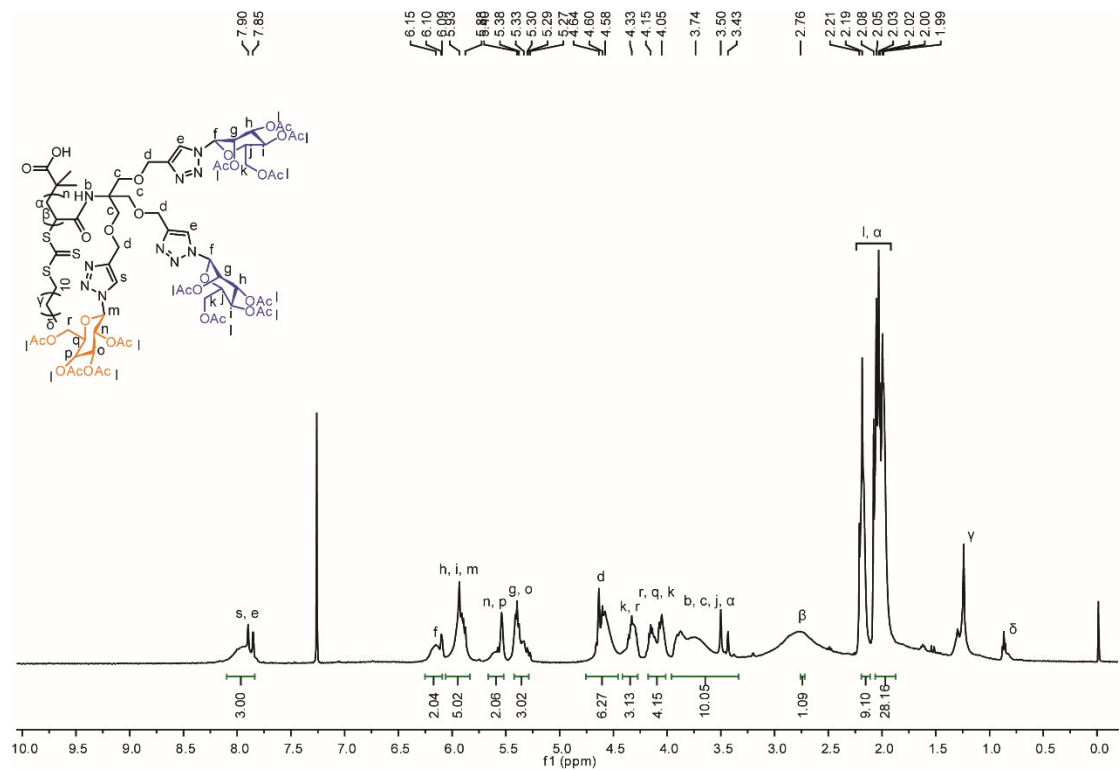

Figure S47.  $^1\text{H}$  NMR spectrum of  $P(\alpha\text{Man}-\alpha\text{Man}-\beta\text{Gal}-\text{OAc})$  in  $\text{CDCl}_3$

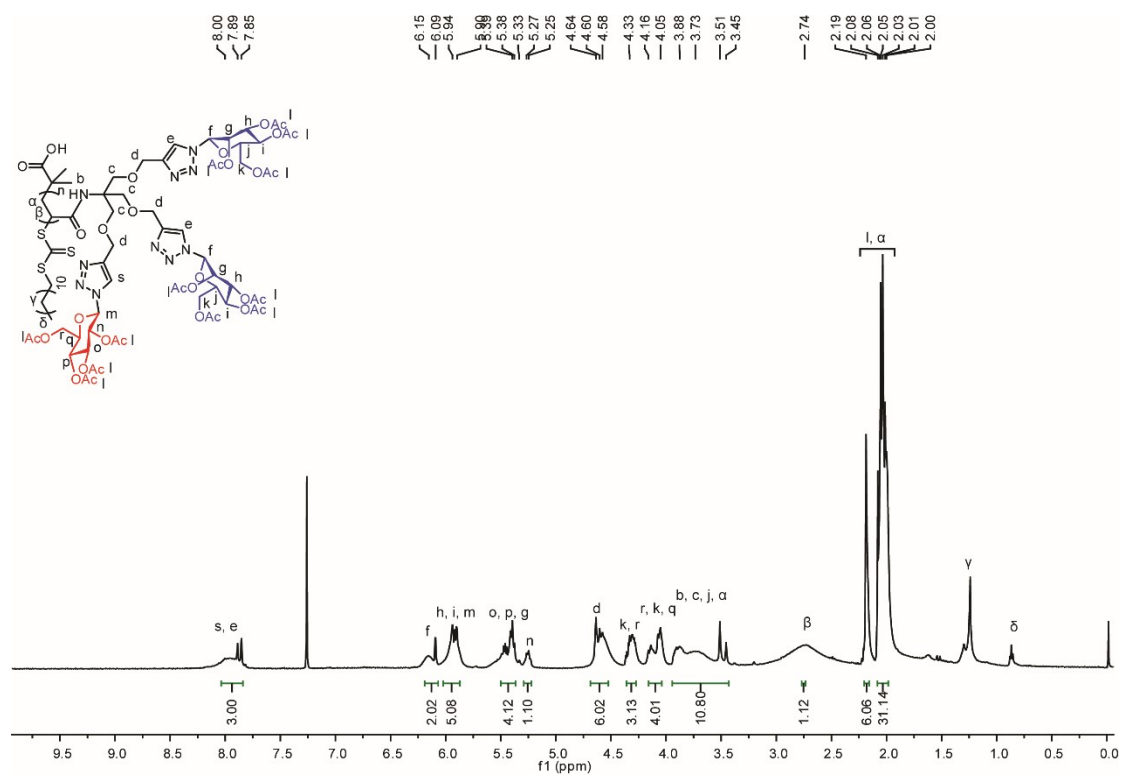

Figure S48.  $^1\text{H}$  NMR spectrum of  $P(\alpha\text{Man}-\alpha\text{Man}-\beta\text{Glu}-\text{OAc})$  in  $\text{CDCl}_3$

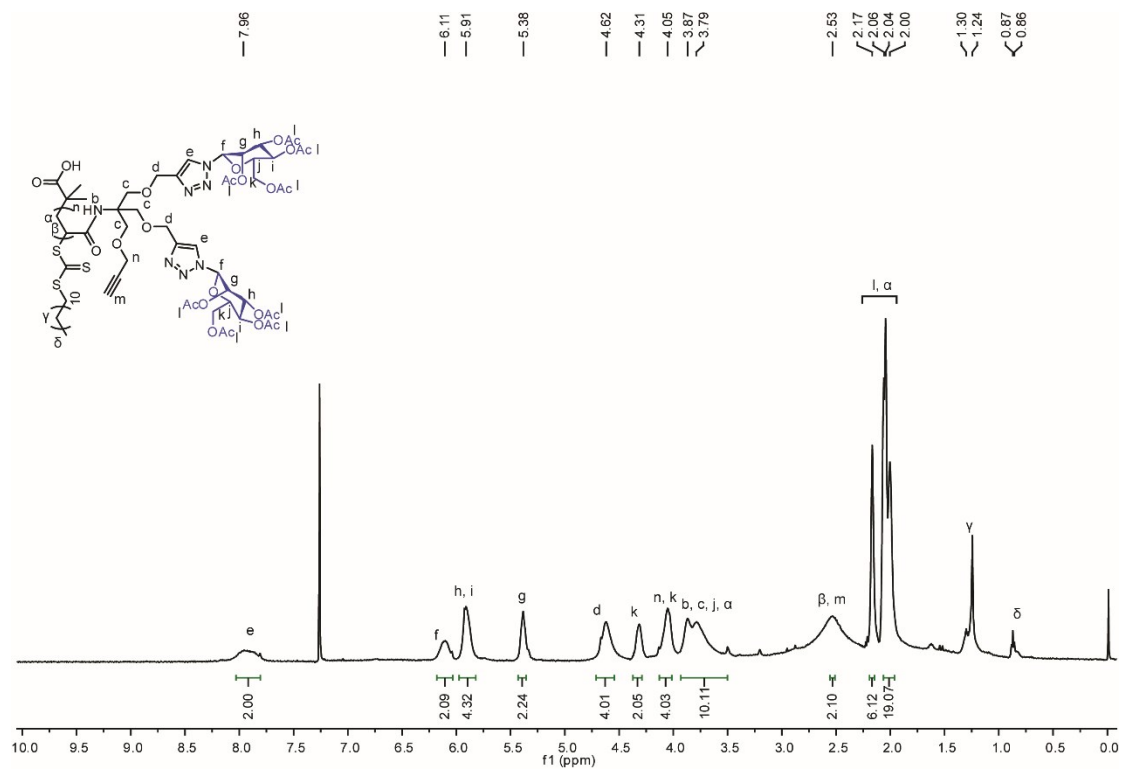

Figure S49.  $^1\text{H}$  NMR spectrum of  $P(\alpha\text{Man-}\alpha\text{Man-yne-OAc})$  in  $\text{CDCl}_3$

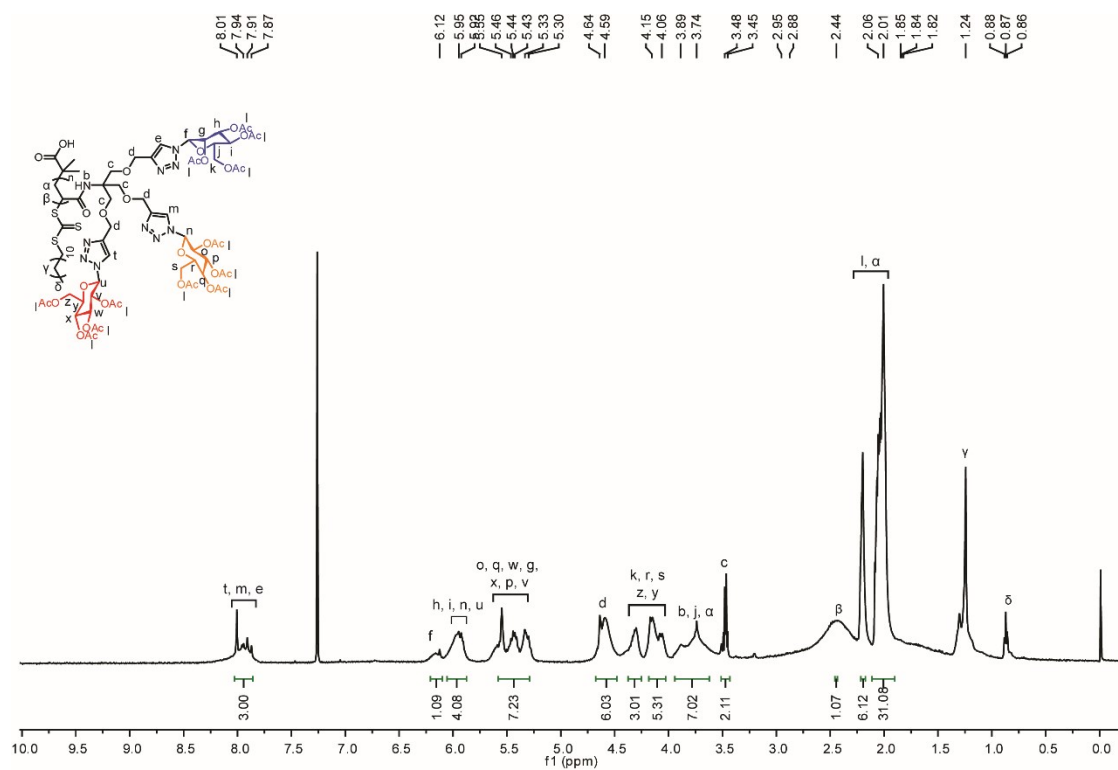

Figure S50.  $^1\text{H}$  NMR spectrum of  $P(\alpha\text{Man-}\beta\text{Gal-}\beta\text{Glu-OAc})$  in  $\text{CDCl}_3$

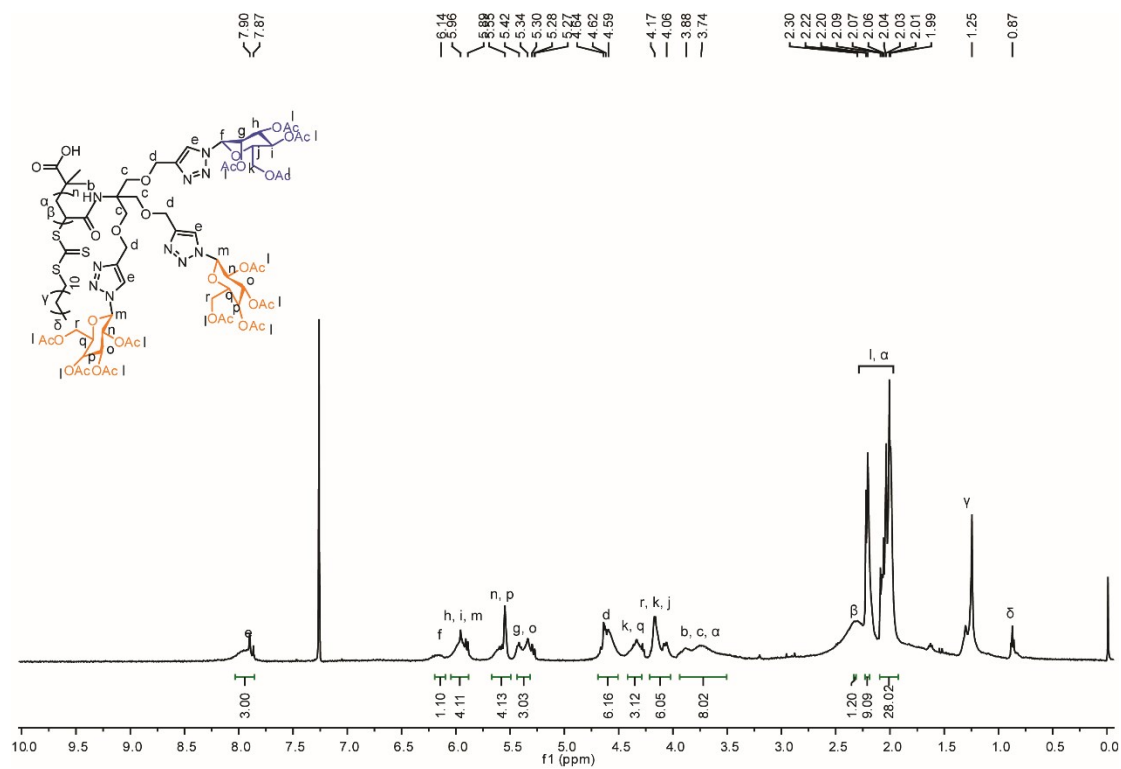

Figure S51.  $^1\text{H}$  NMR spectrum of  $\text{P}(\alpha\text{Man-}\beta\text{Gal-}\beta\text{Gal-OAc})$  in  $\text{CDCl}_3$

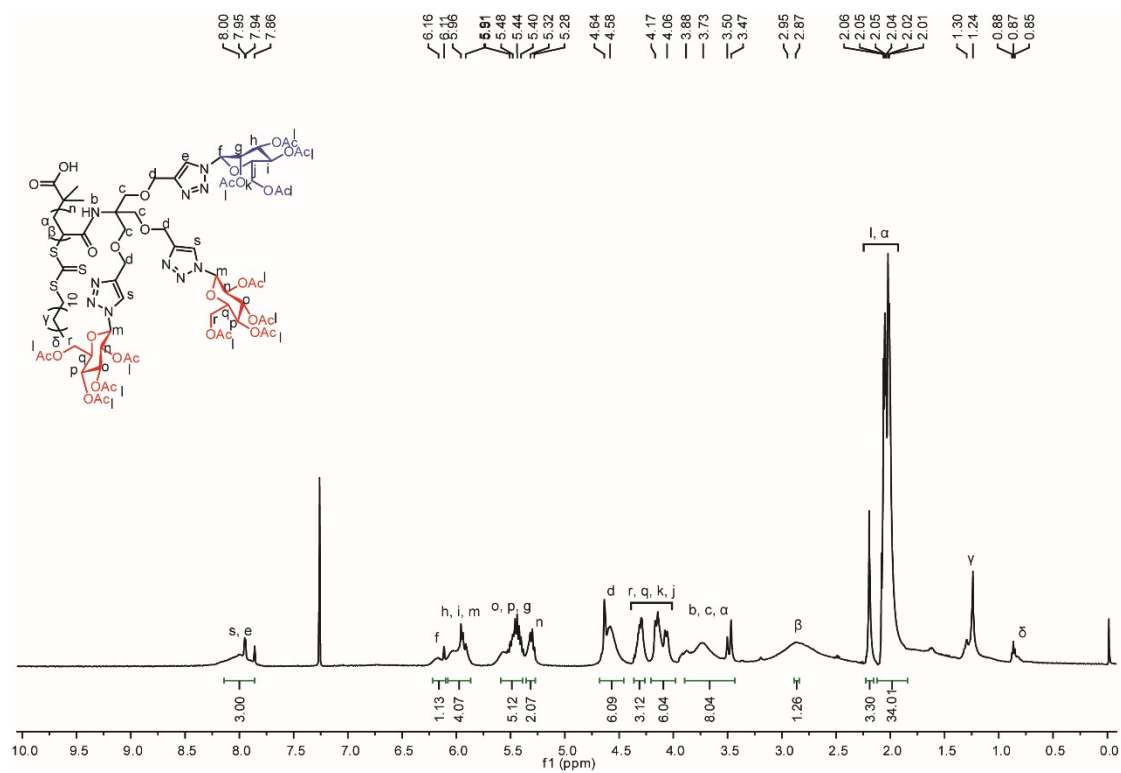

Figure S52.  $^1\text{H}$  NMR spectrum of  $\text{P}(\alpha\text{Man-}\beta\text{Glu-}\beta\text{Glu-OAc})$  in  $\text{CDCl}_3$

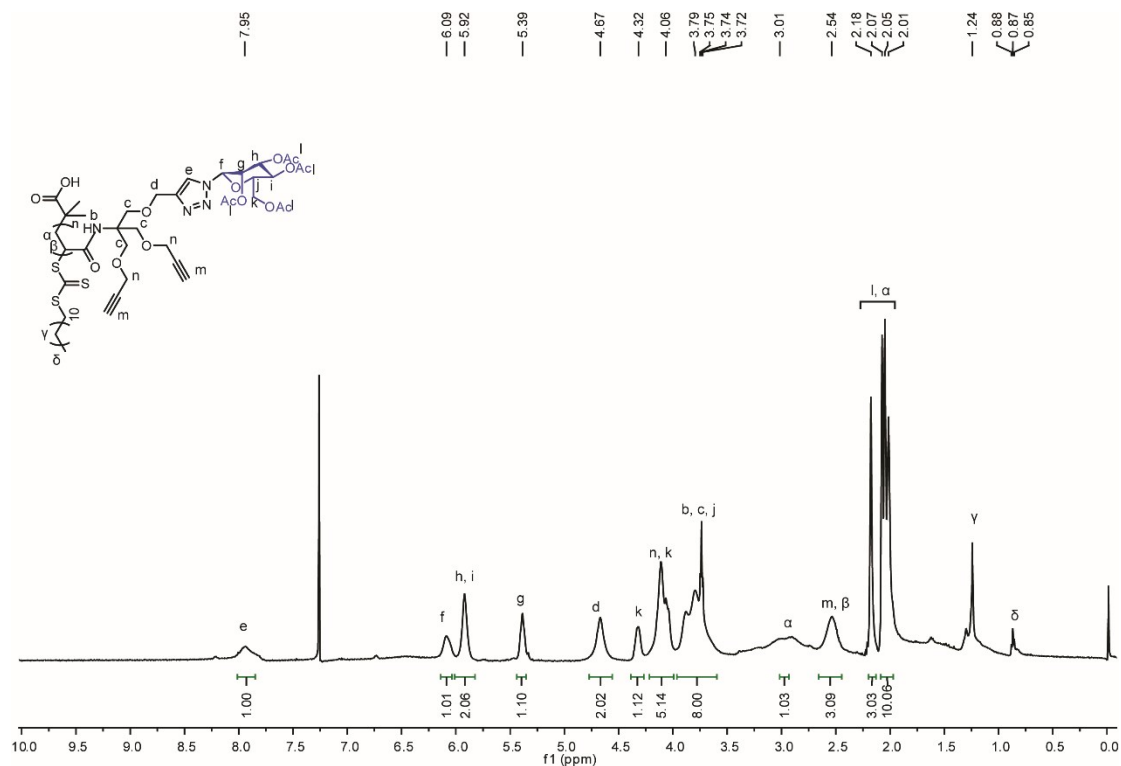

Figure S53.  $^1\text{H NMR}$  spectrum of  $P(\alpha\text{Man-yne-yne-OAc})$  in  $\text{CDCl}_3$

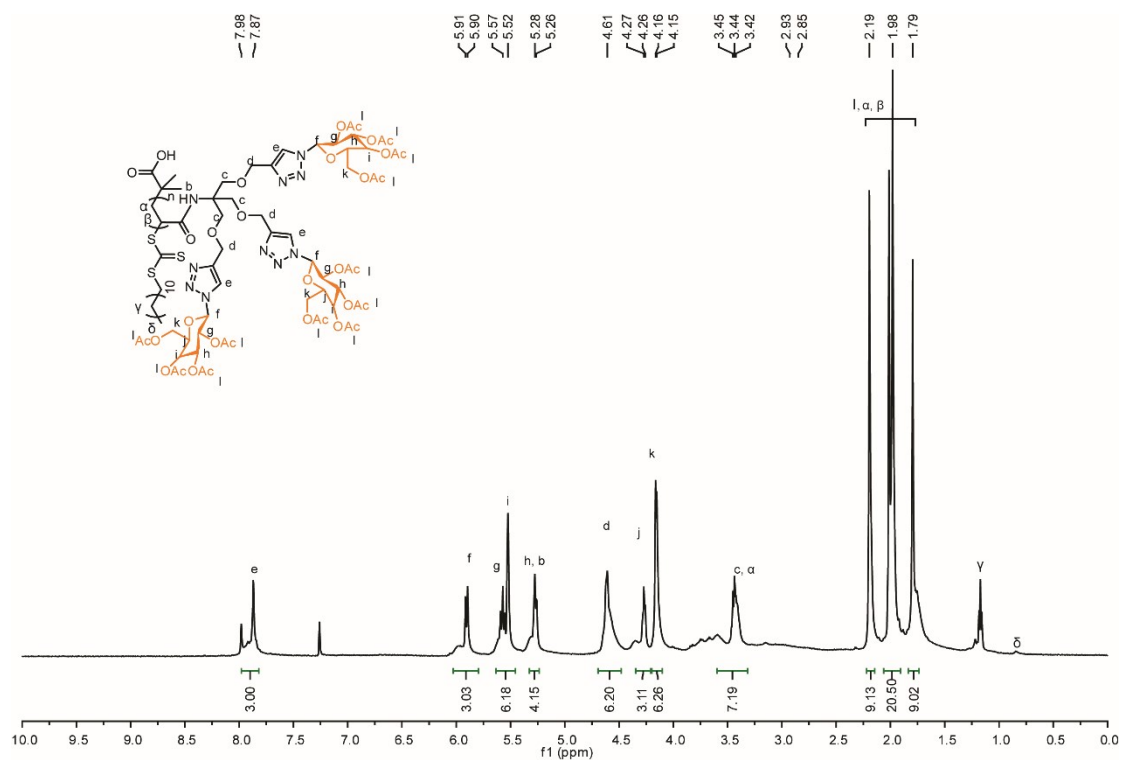

Figure S54.  $^1\text{H NMR}$  spectrum of  $P(\beta\text{Gal-}\beta\text{Gal-}\beta\text{Gal-OAc})$  in  $\text{CDCl}_3$

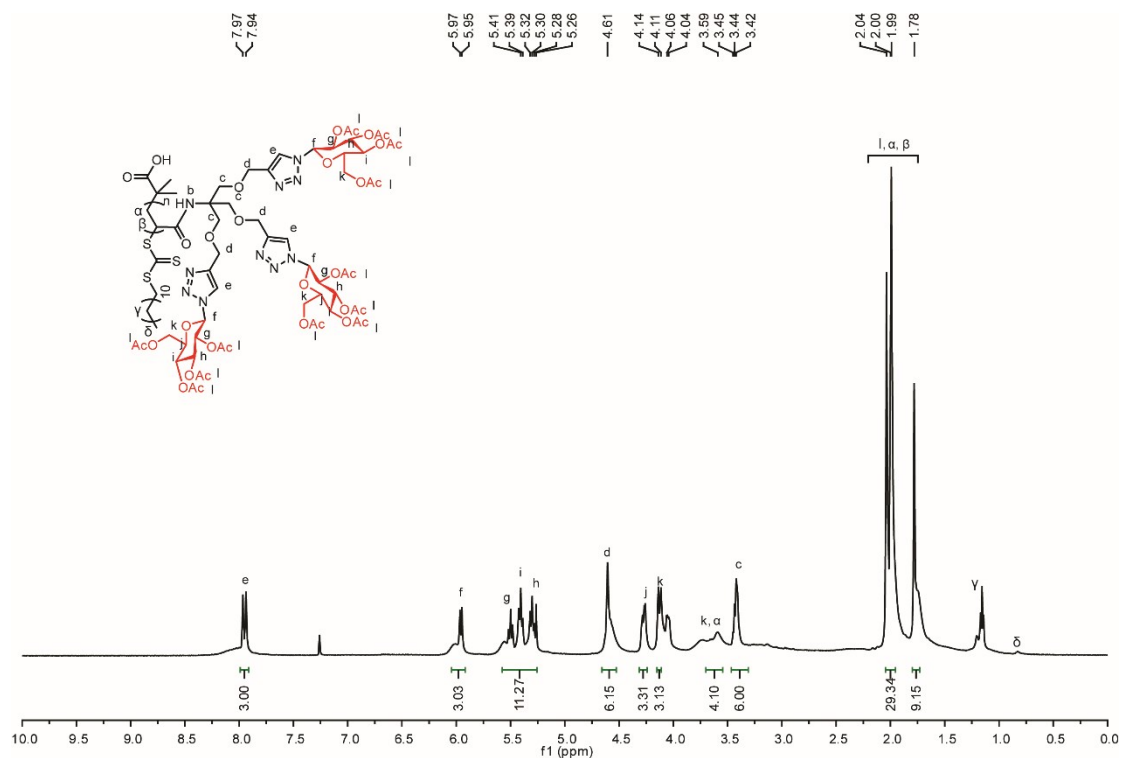

Figure S55.  $^1\text{H}$  NMR spectrum of  $P(\beta\text{Glu}-\beta\text{Glu}-\beta\text{Glu}-\text{OAc})$  in  $\text{CDCl}_3$

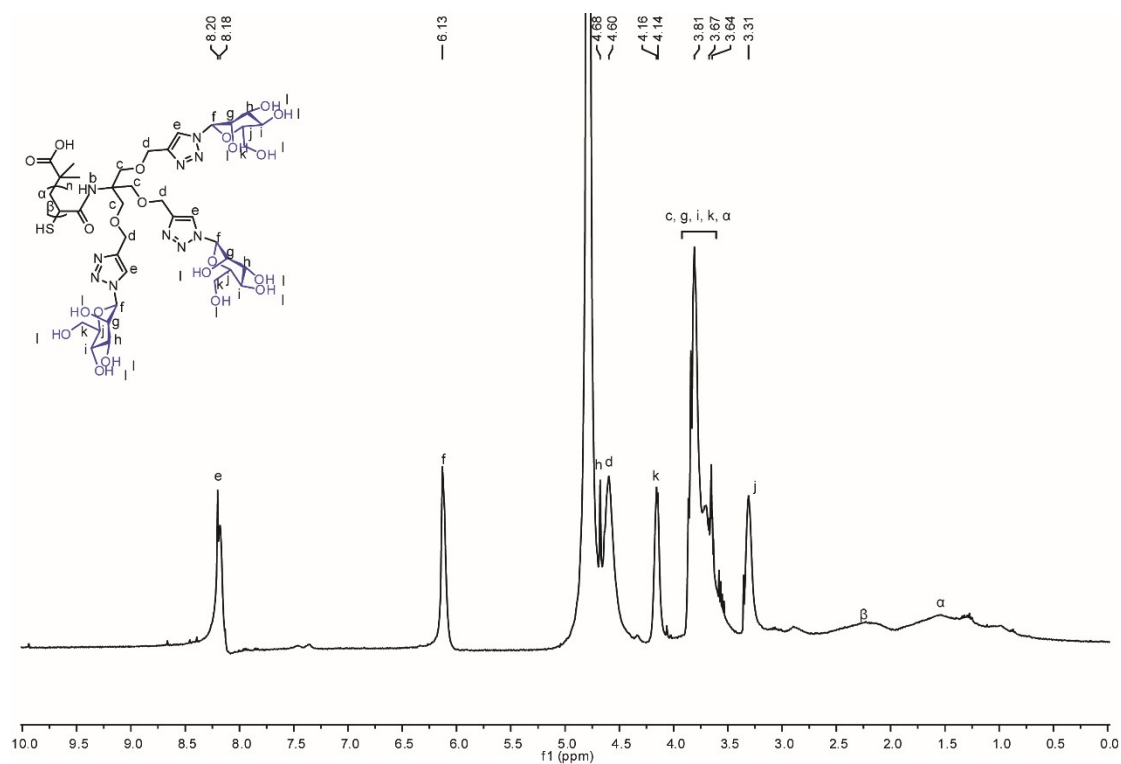

Figure S56.  $^1\text{H}$  NMR spectrum of  $P(\alpha\text{Man}-\alpha\text{Man}-\alpha\text{Man})$  (P1) in  $\text{CDCl}_3$



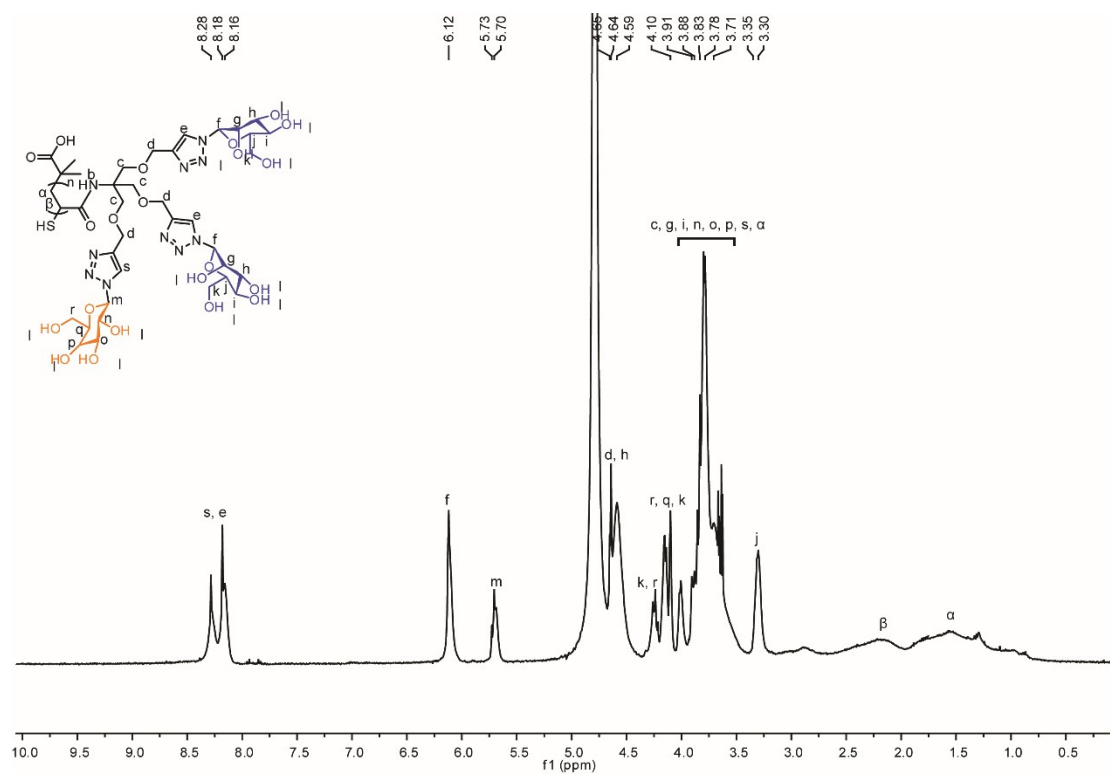

Figure S57.  $^1\text{H}$  NMR spectrum of  $\text{P}(\alpha\text{Man}-\alpha\text{Man}-\beta\text{Gal})$  (**P2**) in  $\text{CDCl}_3$

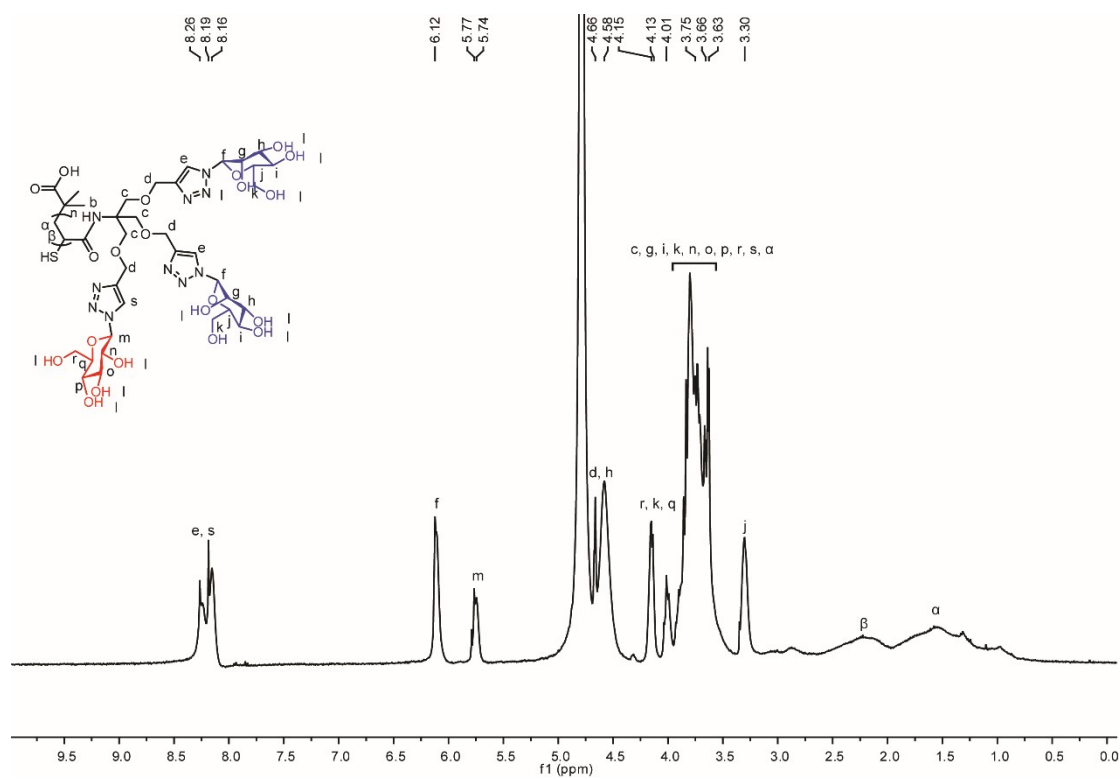

Figure S58.  $^1\text{H}$  NMR spectrum of  $\text{P}(\alpha\text{Man}-\alpha\text{Man}-\beta\text{Glu})$  (**P3**) in  $\text{CDCl}_3$

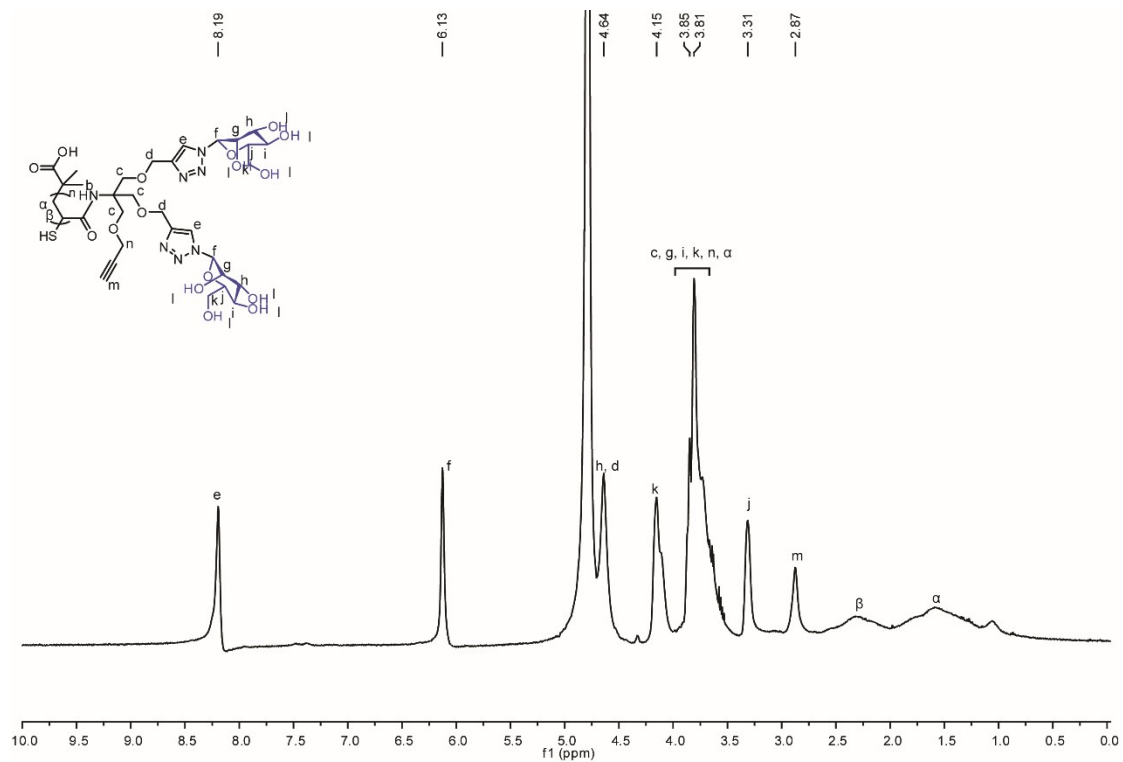

**Figure S59.**  $^1\text{H}$  NMR spectrum of **P( $\alpha$ Man- $\alpha$ Man-yne) (P4)** in CDCl<sub>3</sub>

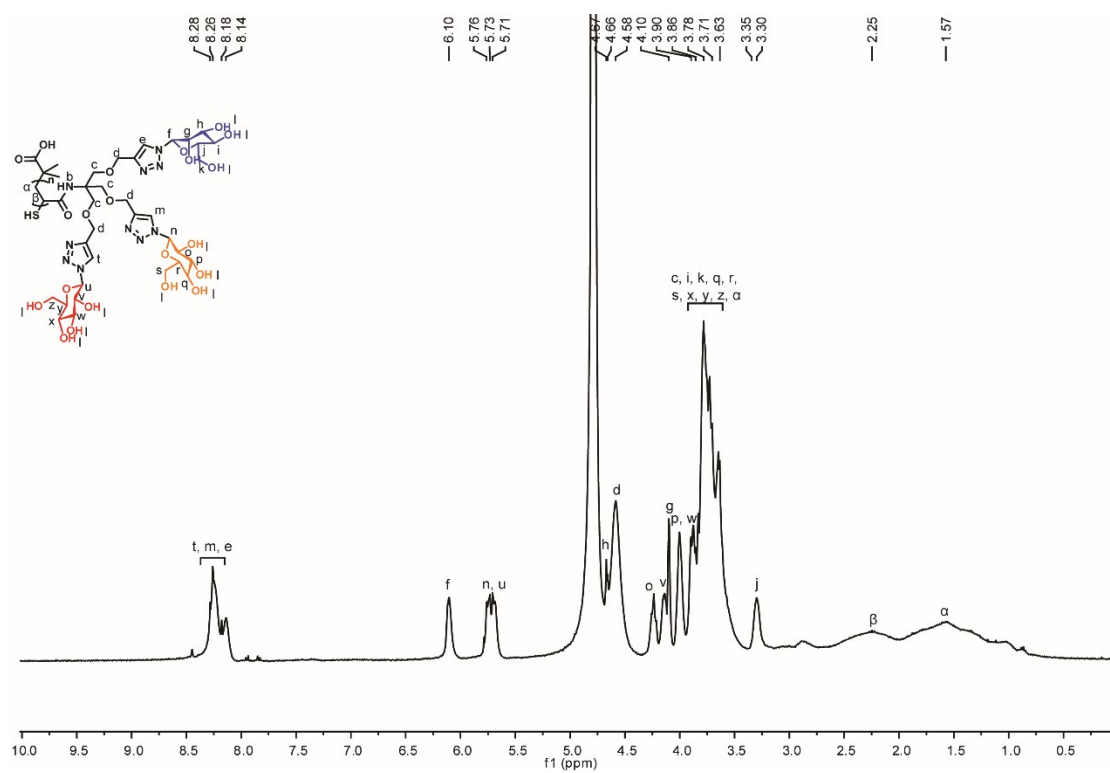

**Figure S60.**  $^1\text{H}$  NMR spectrum of **P( $\alpha$ Man- $\beta$ Gal- $\beta$ Glu) (P5)** in CDCl<sub>3</sub>



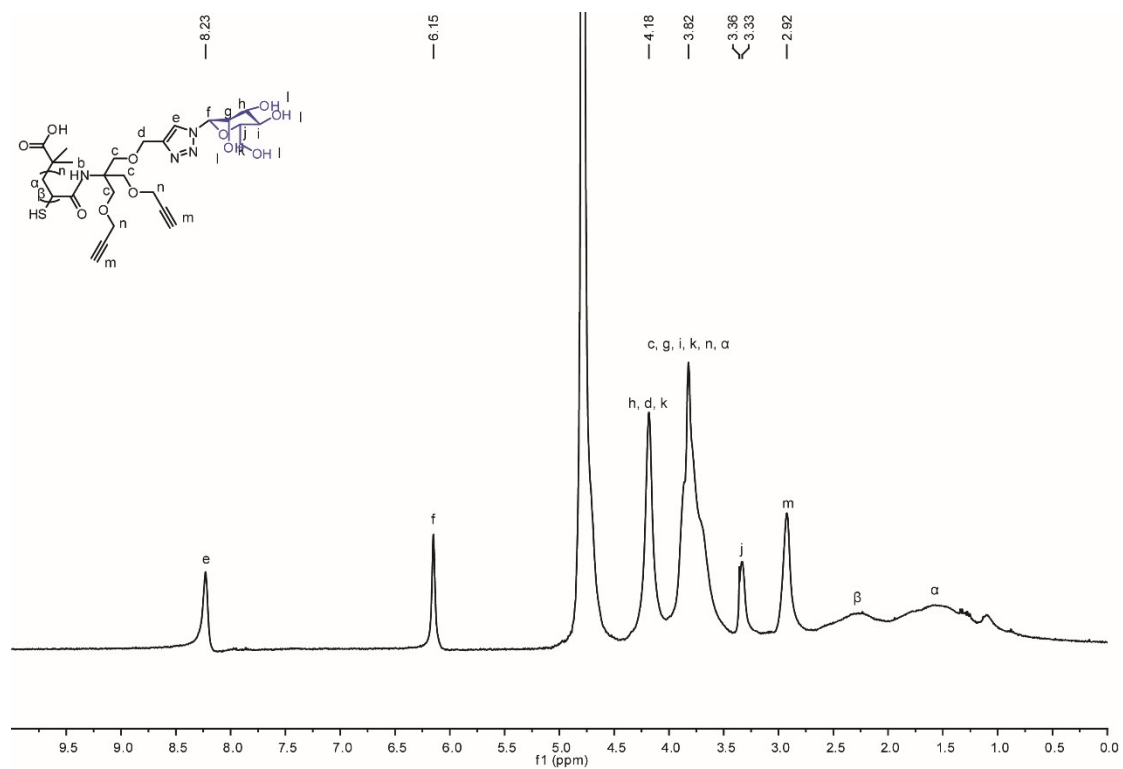

Figure S63.  $^1\text{H}$  NMR spectrum of  $\text{P}(\alpha\text{Man-yne-yne})$  (**P8**) in  $\text{CDCl}_3$

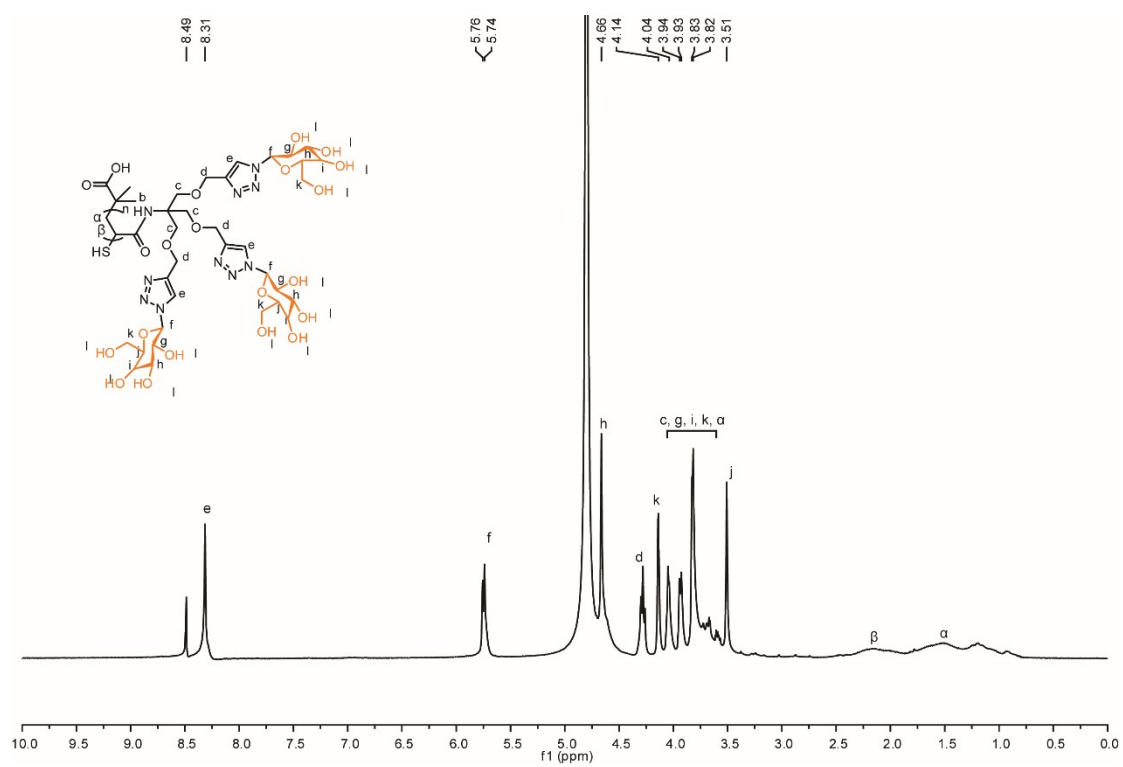

Figure S64.  $^1\text{H}$  NMR spectrum of  $\text{P}(\beta\text{Gal-}\beta\text{Gal-}\beta\text{Gal})$  (**P9**) in  $\text{CDCl}_3$

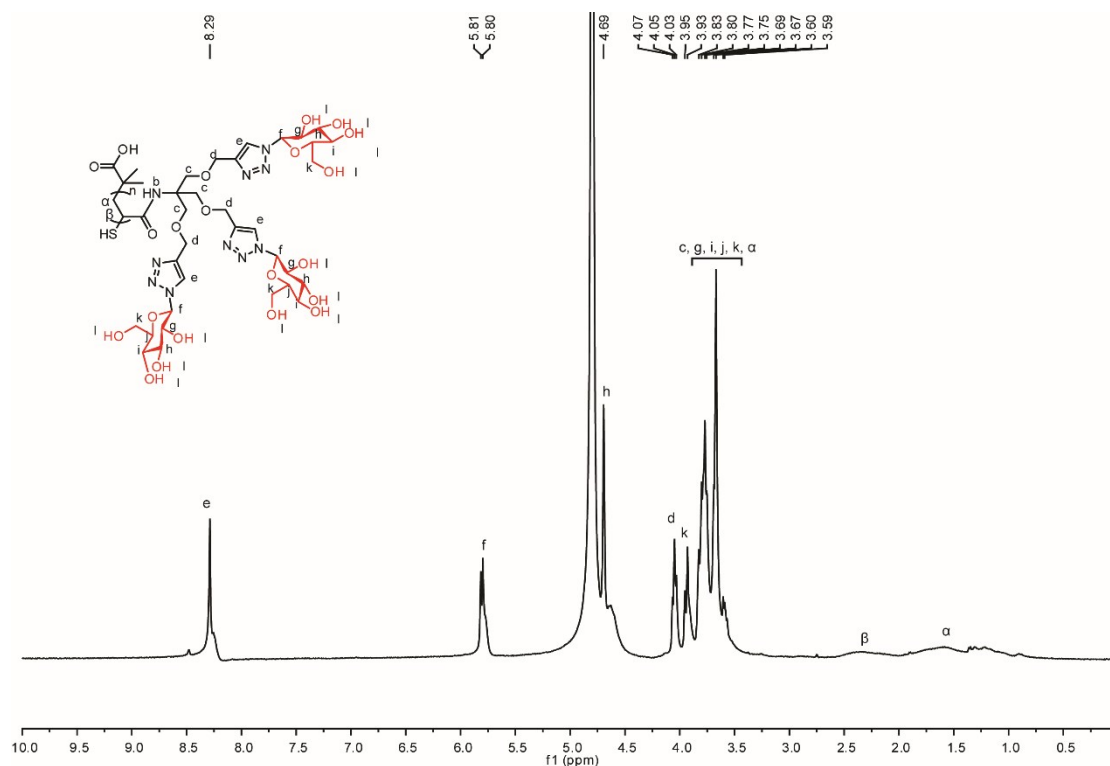

Figure S65.  $^1\text{H}$  NMR spectrum of  $\text{P}(\beta\text{Glu}-\beta\text{Glu}-\beta\text{Glu})$  (P10) in  $\text{CDCl}_3$

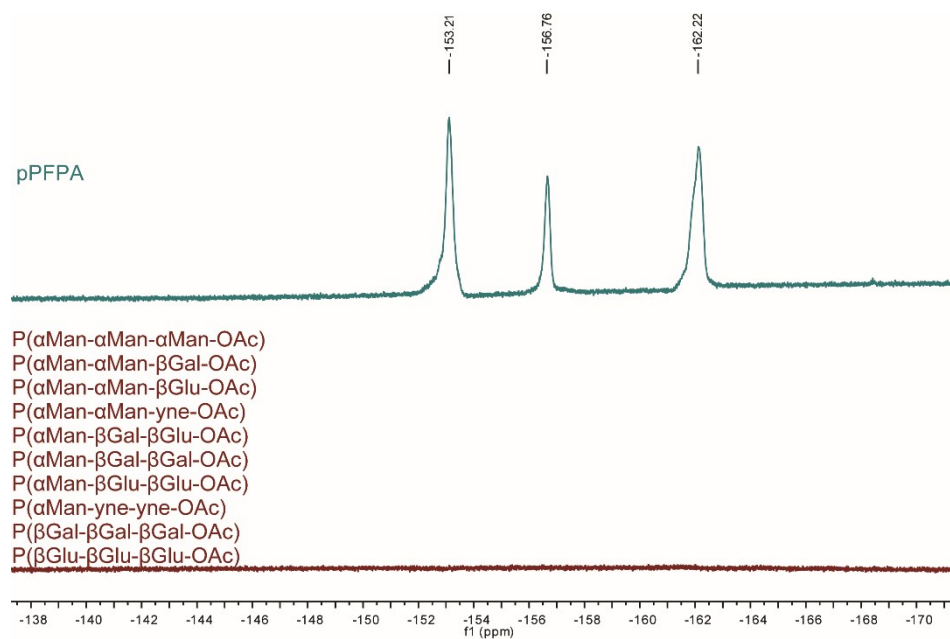

Figure S66.  $^{19}\text{F}$  NMR spectrum of pPFPA and OAc-protected glycopolymers in  $\text{CDCl}_3$

### 3. FT-IR spectra of glycopolymers

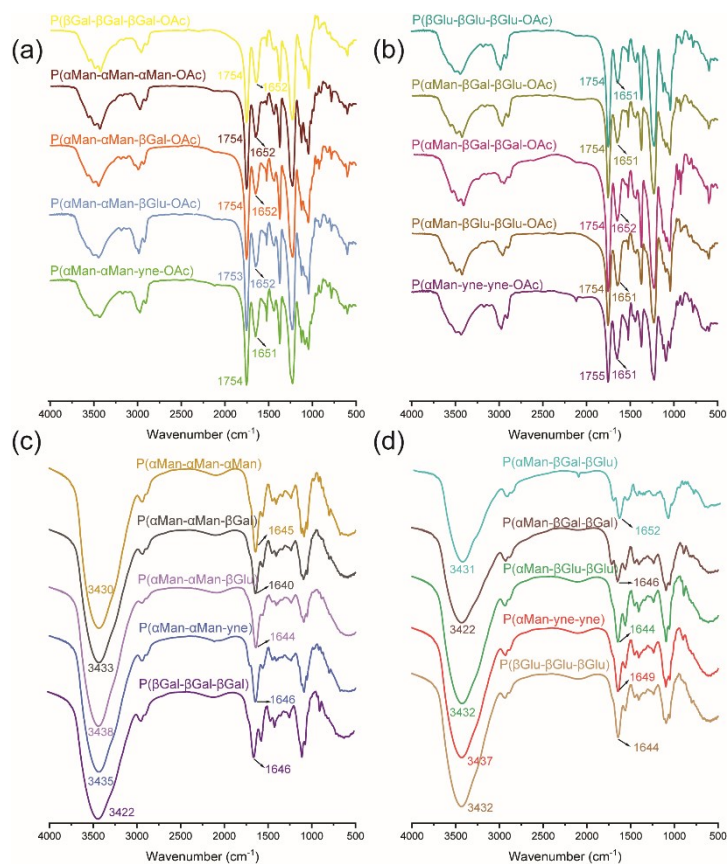

Figure S67. FT-IR spectra of the OAc-protected glycopolymers (a), (b) and deprotected glycopolymers (c), (d).

### 4. Dynamic light scattering

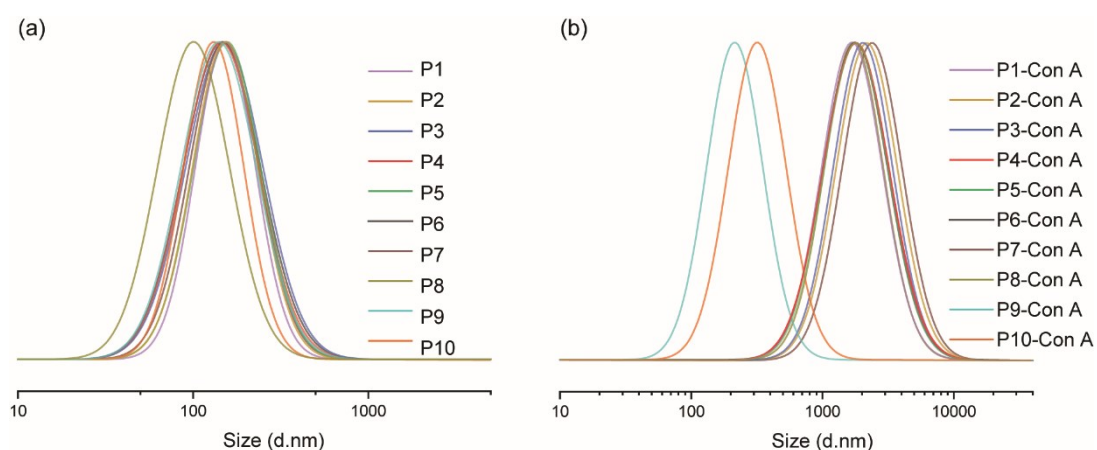

Figure S68. DLS study of interaction behavior between glycopolymers and Con A in HEPES buffer.

## 5. ITC thermograms

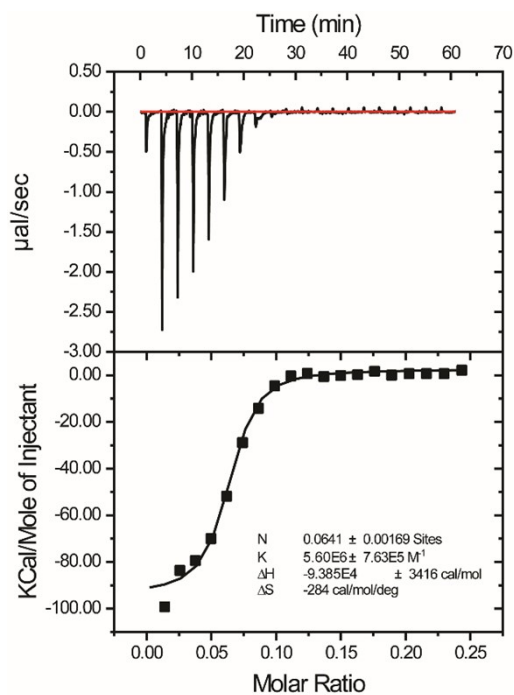

Figure S69. Calorimetric titration for P( $\alpha$ Man- $\alpha$ Man).

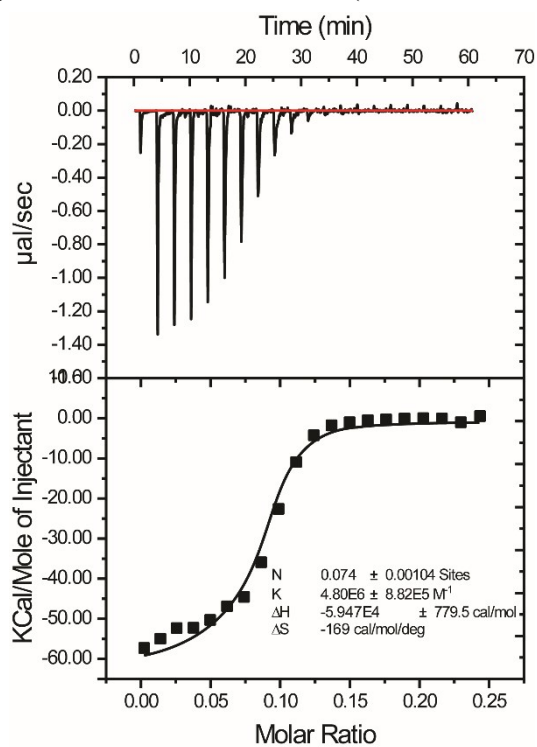

Figure S70. Calorimetric titration for P( $\alpha$ Man- $\alpha$ Man- $\beta$ Gal).

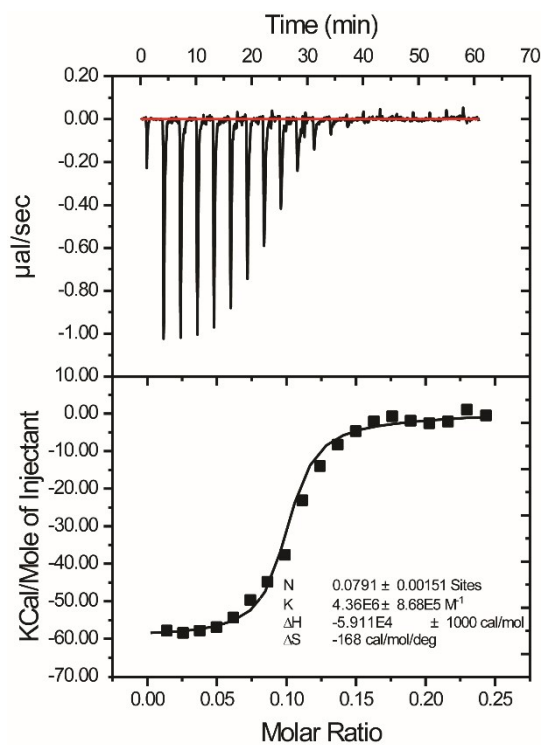

Figure S71. Calorimetric titration for P( $\alpha$ Man- $\alpha$ Man- $\beta$ Glu).

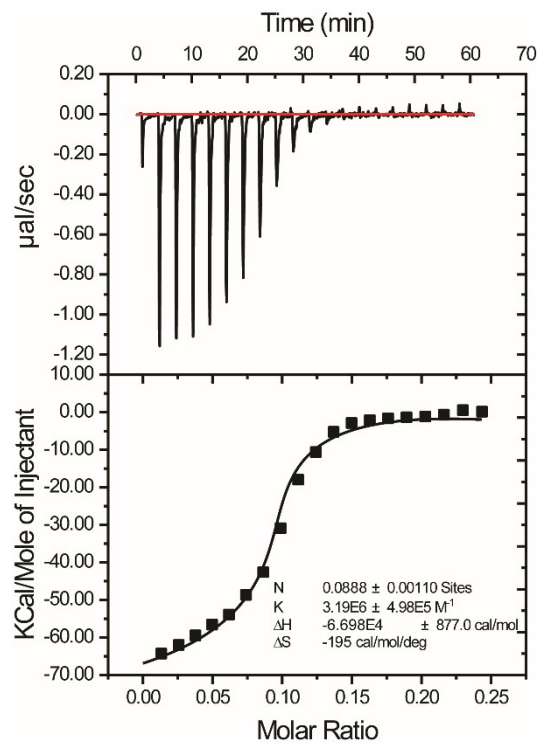

Figure S72. Calorimetric titration for P( $\alpha$ Man- $\alpha$ Man- $\gamma$ ne).



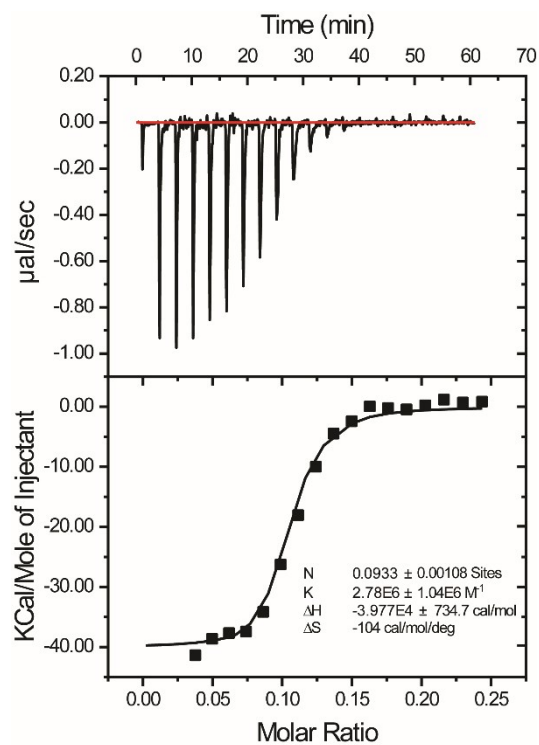

Figure S73. Calorimetric titration for P(αMan-βGal-βGlu).

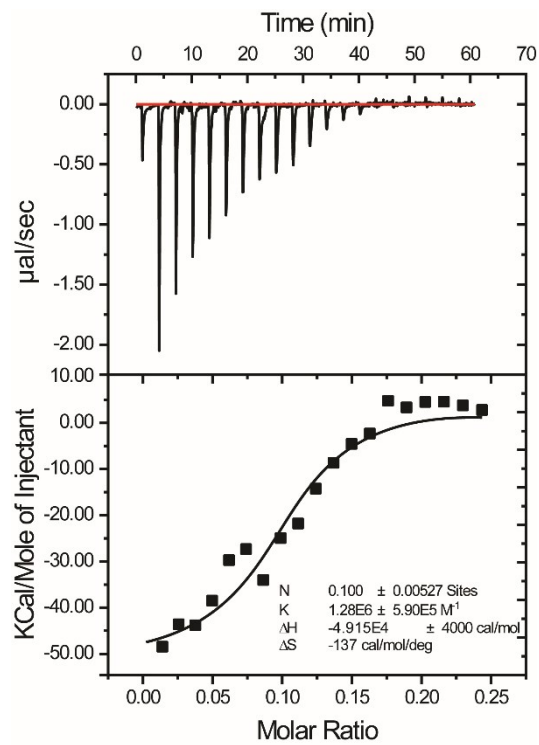

Figure S74. Calorimetric titration for P(αMan-βGal-βGal).

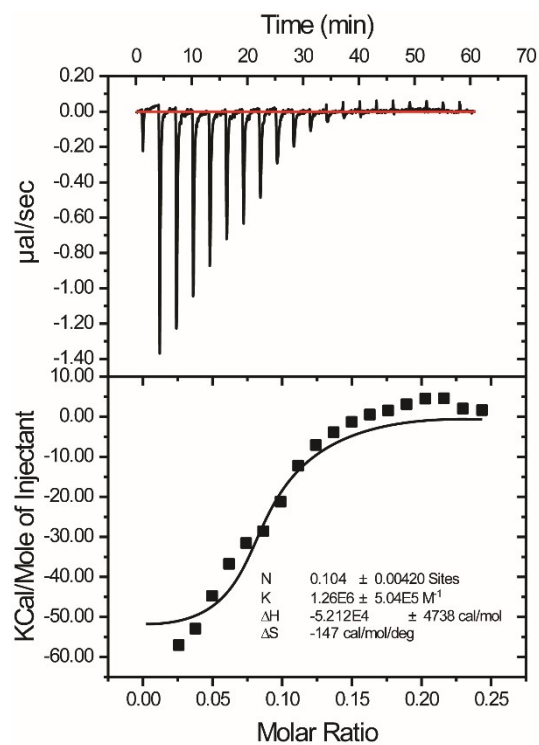

Figure S75. Calorimetric titration for P(αMan-βGlu-βGlu).

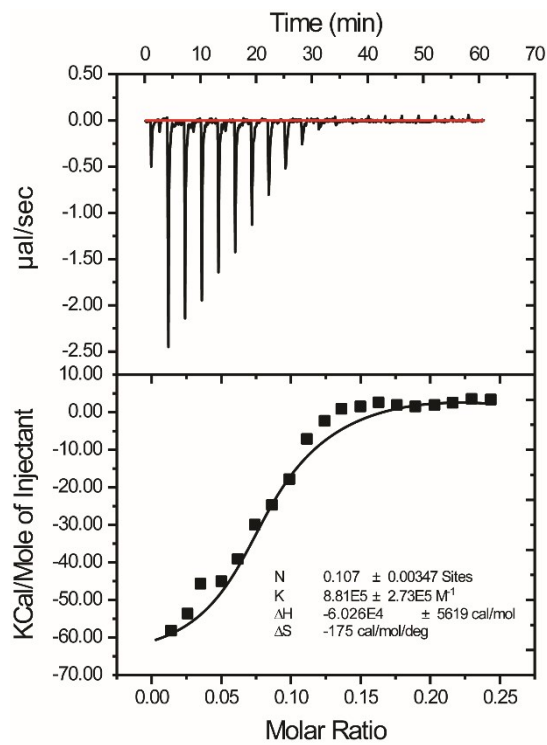

Figure S76. Calorimetric titration for P(αMan-yne-yne).

## 6. Characterization of OAc-protected glycopolymers

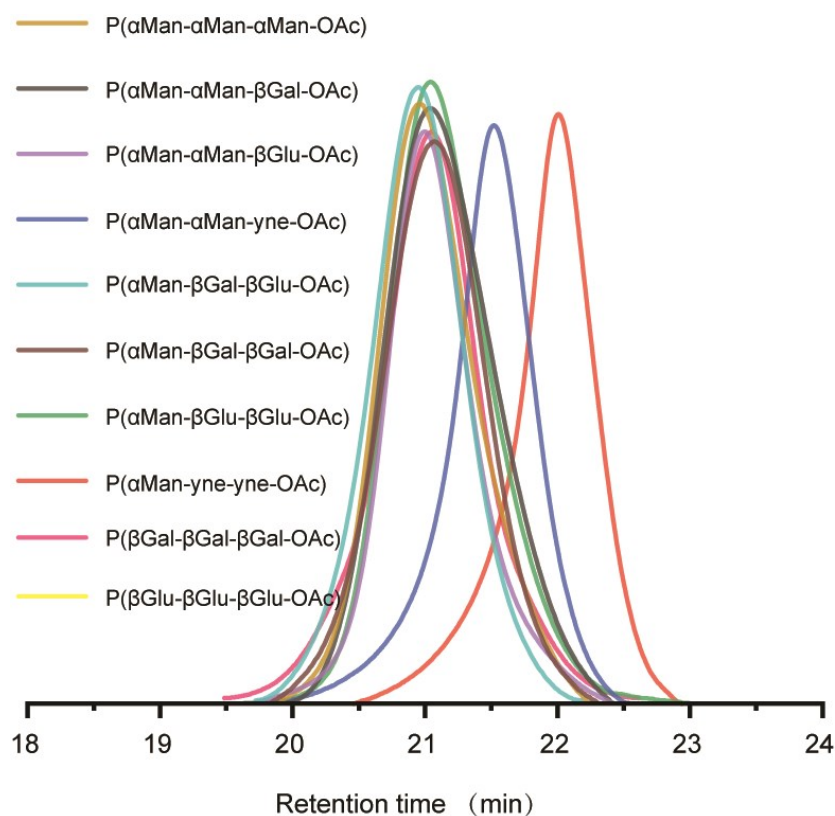

Figure S77. GPC chromatogram of OAc-protected glycopolymers

Table S1 Characterization of the pPFPA and OAc-protected glycopolymers

| OAc-protected glycopolymer and pPFPA | Yield <sup>a</sup> [%] | M <sub>n</sub> <sup>b</sup> [KDa] | M <sub>w</sub> <sup>b</sup> [KDa] | D <sup>b</sup> |
|--------------------------------------|------------------------|-----------------------------------|-----------------------------------|----------------|
| P(αMan-αMan-αMan-OAc)                | 56                     | 15.5                              | 19.2                              | 1.24           |
| P(αMan-αMan-βGal-OAc)                | 55                     | 15.3                              | 19.0                              | 1.24           |
| P(αMan-αMan-βGlu-OAc)                | 58                     | 15.5                              | 18.9                              | 1.22           |
| P(αMan-αMan-yne-OAc)                 | 55                     | 11.4                              | 14.2                              | 1.25           |
| P(αMan-βGal-βGlu-OAc)                | 55                     | 15.5                              | 19.0                              | 1.23           |
| P(αMan-βGal-βGal-OAc)                | 56                     | 15.1                              | 18.8                              | 1.25           |
| P(αMan-βGlu-βGlu-OAc)                | 58                     | 15.3                              | 18.7                              | 1.23           |
| P(αMan-yne-yne-OAc)                  | 56                     | 6.8                               | 8.4                               | 1.24           |
| P(βGal-βGal-βGal-OAc)                | 56                     | 15.3                              | 18.8                              | 1.23           |
| P(βGlu-βGlu-βGlu-OAc)                | 58                     | 15.5                              | 19.1                              | 1.23           |
| pPFPA                                | 65                     | 3.8                               | 4.3                               | 1.14           |

<sup>a</sup> Isolated yield. <sup>b</sup> Obtained by GPC (DMF).
